# Supplementary material
Source: Research Square preprint supplement (doi:10.21203/rs.3.rs-9718494/v1)
Supplement: Supplementary file 1 [file d0cdb7d1ae5020ecc7abf1f5.docx]

**Supporting Information**

**Strategy of Electron-Withdrawing-Group Peripheralization (SEP) for Designing High-performance Polymer Donors in Organic Solar Cells**

Tan Wang1,3,4, Yuchang Zhao1,2, Fuzhen Bi1,3,4, Tong Liu1,2, Zhen Fu5, Jingfei Chen1,3,4, Chunming Yang2,6, Xiaotao Hao5, Junhao Chu1,3,4, Alex K.-Y. Jen7, Xichang Bao1,2,3,4,*

1 StateKey Laboratory of Photoelectric Conversion and Utilization of Solar Energy, Qingdao Institute of Bioenergy and Bioprocess Technology, Chinese Academy of Sciences, Qingdao, 266101, China

2 College of Materials Sciences and Opto-Electronic Technology, Uninversity of Chinese Academy of Sciences, Beijing, 100049, China

3 Laboratory of Solar Energy, Shandong Energy Institute, Qingdao, 266101, China

4 Qingdao New Energy Shandong Laboratory, Qingdao, 266101, China

5 School of Physics State Key Laboratory of Crystal Materials, Shandong University, Jinan, 250100, China

6 Shanghai Synchrotron Radiation Facility Shanghai Advanced Research Institute, Chinese Academy of Sciences, Shanghai 201204, China

7 Department of Materials Science and Engineering, City University of Hong Kong, Kowloon, 999077, Hong Kong

*Correspondence author: baoxc@qibebt.ac.cn

**Table of Contents**

1. General Experimental Procedures

2. Synthesis

3. Nuclear Magnetic Resonance Spectra

4. Molecular geometry and ESP analysis

5. Cyclic Voltammetry

6. Gel Permeation Chromatography

7. Thermogravimetric Analysis

8. Charge transmission and distribution

9. Exciton binding energy, dielectric constant and exciton Bohr radius

10. Femtosecond transient absorption

11. Optimization of Device Performance

12. Exciton Dissociation and Collection Probability

13. Charge Carrier Mobility

14. TPC and TPV

15. Grazing Incidence Wide Angle X-Ray Scattering Peak Fitting

16. Atomic Force Microscope and Transmission Electron Microscope

17. Contact Angles

18. D/D self-aggregation and D/A distribution

19. Molecular structure

20. Optimization of Device Performance treated with PVDF-TrFE and PAEN

21. EQE curves of PBDTT-L8BO device treated with PVDF&PAEN

22. The certification report

23. Energy loss analysis

24. Comparative evaluation of SEP principle in LBL and BHJ architecture

25. Summary of device performance

26. Reference

**1. General experimental procedures**

**1.1 Materials**

The acceptors L8-BO, Y6, eC9 and PDINN were purchased from Derthon Co. Ltd. PVDF-TrFE was purchased from Piezotech Arkema Inc. PAEN were synthesized as previously reported1. The starting reagents and solvents were purchased from Alfa Aesar, Sigma-Aldrich, Ltd, Bide Pharmatech Ltd. et al., which were utilized directly unless stated otherwise.

**1.2 Characterization**

1H and 13C NMR spectra were measured on a Bruker Avance-600 spectrometer at 298 K. Absorption spectra and temperature-dependent absorption spectrum were recorded on a Hitachi U-4100 UV-Vis scanning spectrophotometer. The polymer was determined by Agilent 1260 Infinity II high temperature gel permeation chromatography (GPC) at 150℃ with 1,2, 4-trichlorobenzene as eluent. Thermogravimetric analysis (TGA) thermogram was tested from room temperature to 600°C under Ar atmosphere and the heating rate is 10°C min-1 on Mettler TGA/DSC3+. Cyclic voltammetry was done by using a Shanghai Chenhua CHI660D voltametric analyzer under argon at a scan rate of 100 mV s-1 in an anhydrous acetonitrile solution of tetra-n-butylammonium hexafluorophosphate (0.1 M). A glassy-carbon electrode was used as the working electrode, a platinum-wire was used as the counter electrode, and a saturated calomel electrode (SCE) was used as the reference electrode. Polymers were coated onto glassy-carbon electrode and all potentials were corrected against Fc/Fc+ with -4.80 eV as absolute energy level. Temperature-dependent PL spectra were measured by FLS980 infrared fluorescence spectrometer, with excitation at 470 nm for PDs provided by 450W ozone-free continuous xenon lamp. The temperature was controlled by a temperature controller for thermal equilibrium, and the measurement at each temperature point was held for at least 20 minutes before starting. The dielectric constants of pristine and blend film were measured by the capacitance -frequency (C-F) measurements with a device structure of ITO/PEDOT:PSS/test film/Al. The C-F measurements were performed under the frequency from 1 to 1×106 Hz. The εr were calculated from the equation of εr = CL/ε0A, where C is the capacitance, L is the thickness of the tested film (≈200 nm) and A is the device area (0.0936 cm2).

The theoretical simulations of molecular conformations were based on Gaussian at a B3LYP/6-31G(d, p) set. The molecular electrostatic potential (ESP) and independent gradient model based on Hirshfeld partition (IGMH) analysis were implemented using Multiwfn 3.82, 3 and outputs are visualized using VMD 1.9.3.4

Femtosecond transient absorption spectroscopy measurements were performed on an Ultrafast Helios pump-probe system in collaboration with a regenerative amplified laser system from Coherent. Apulse with a repetition rate of 1k Hz, a length of 100 fs, and an energy of 7 μJ cm-2 pulse-1, was generated by a Ti:sapphire amplifier (Astrella, Coherent). Then the pulse was separated into two parts by a beam splitter. One part was coupled into an optical parametric amplifier (TOPAS, Coherent) to generate the pump pulses at various wavelengths. The other part was focused on a sapphire plate and a YAG plate to generate white light supercontinuum as the probe beams. The time delay between pump and probe was controlled by a motorized optical delay line with a maximum delay time of 10 ns. The pump pulse is chopped by a mechanical chopper with 500 Hz and then focused on to the mounted sample with probe beams. The energy of pump pulse was measured and calibrated by a power meter (PM400, Thorlabs). The samples used for TA measurements were obtained by spin-coating the neat and blend solutions on the quartz substrates.

All pure films and blend films for film characterization were deposited onto PEDOT:PSS/Si substrates via spin-coating. The photoluminescence (PL) spectra and time-resolved photoluminescence (TRPL) spectra were recorded by FLS1000 Edinburgh steady state and transient fluorescence spectrometer with excited wavelength of 550 nm. Grazing incidence wide-angle X-ray scattering (GIWAXS) patterns were acquired from Shanghai Synchrotron Radiation Facility at beam BL6B1. Transmission electron microscopy (TEM) images were obtained by using a Hitachi HT7800 electron microscope with an acceleration voltage of 100kV. Atomic force microscopy (AFM) images were obtained using Agilent 5400 scanning probe microscope in tapping mode with MikroMasch NSC-15 AFM tips. The thickness of films was measured using a Veeco Dektak 150 profilometer. Contact angles are measured by the contact angle measuring instrument CSCDIC-200S with water (H2O) and diiodomethane (CH2I2) droplet on top of the films. In-situ absorptions were carried out from the in-situ dynamic spectrometer DU-300, with chloroform as the solvents. For transient photovoltage (TPV) and photocurrent (TPC), the background illumination was provided by the LED light source, and pulsed light was provided by an arbitrary wave generator (AFG322C, Tektronix). The photovoltage traces were registered by the oscilloscope (AFG322C, Tektronix). The photocurrent traces were registered with the resistance of 50Ω, switching open-circuit mode to short-circuit mode. The integrated TPC signal provides a measure of the total charge generated by the LED light source.

**1.3 Device fabrication and measurements**

**Conventional solar cells**

All the solar cells were fabricated with a conventional device structure of ITO/PEDOT:PSS/active layer/PDINN/Ag. The patterned ITO glass (sheet resistance = 20 Ω/ square) was pre-cleaned in an ultrasonic bath of acetone and isopropyl alcohol and treated in an ultraviolet-ozone chamber (PREEN II-862) for 4 min. A 30 nm thick PEDOT:PSS layer (Heraeus Clevios P VP. AI 4083) was filtered (0.45 μm) and made by spin-coating an aqueous dispersion onto ITO glass (4000 rpm for 30 s) for hole transfer layer. PEDOT:PSS substrates were dried at 150 °C for 15 min in air. Transfer the glasses to the glove box and then washed the surface with ethanol at 5000 rpm for 30 s. For LBL devices: PDs is dissolved in chlorobenzene (CB) / chloroform (CF), then spin coated and annealed at 100 °C for 5 min of CB and 1 min of CF. 8.6 mg mL-1 L8-BO is dissolved in CF, dissolved at 45 °C for 2 h, and then spin coating to the upper layer of PDs film at 2500 rpm for 30 s, annealed at 90 °C for 7 min. 1,3,5-trichlorobenzene (TCB) as solid additive add in both donor and acceptor layer. For BHJ devices: A PDs:L8BO blend in chloroform (CF) was spin-coated onto PEDOT:PSS, with TCB as solid additive, followed by a rapid annealing process. PDINN (1 mg/mL) in MeOH was spin-coated onto an active layer (3000 rpm for 30 s) to form the electron transfer layer. Ag (~80 nm) was evaporated onto PDINN through a shadow mask (pressure ca. 10-4 Pa). The effective area for the devices is 0.0936 cm2.

Charge carrier mobility was measured by SCLC method. The mobility was determined by fitting the dark current to the model of a single carrier SCLC, which is described by:

where *J* is the current density, *μ* is the zero-field mobility of holes (*μ*h) or electrons (*μ*e), *ε*0 is the permittivity of the vacuum, *ε*r is the relative permittivity of the material, *d* is the thickness of the blend film, and *V* is the effective voltage (*V* = *V*appl - *V*bi, where *V*appl is the applied voltage, and *V*bi is the built-in potential determined by electrode work function difference). Here, *V*bi = 0.1 V for hole-only devices, *V*bi = 0 V for electron-only devices. The mobility was calculated from the slope of *J*1/2*-V* plot5.

**Measurements**

The current density–voltage (*J*-*V* curve) was measured by using a computerized Keithley 2400 SourceMeter and a Xenon-lamp-based solar simulator (Enli Tech, AM 1.5G, 100 mW cm-2). The illumination intensity of solar simulator was determined by using a monocrystalline silicon solar cell (Enli SRC2020, 2 cm × 2 cm) calibrated by NIM. The external quantum efficiency (EQE) spectra were measured by using a QE-R3011 measurement system (Enli Tech).

**Hole-only devices**

The structure for hole-only devices is ITO/PEDOT:PSS/active layer/MoO3/Ag. A 30 nm thick PEDOT:PSS layer was made by spin-coating an aqueous dispersion onto ITO glass (4000 rpm for 30 s). PEDOT:PSS substrates were dried at 150 °C for 10 min. A pure polymer or a blend in CF was spin-coated onto PEDOT:PSS layer. Finally, MoO3 (~ 6 nm) and Ag (~ 80 nm) were successively evaporated onto the active layer through a shadow mask (pressure ca. 10-4 Pa). *J-V* curves were measured by using a computerized Keithley 2400 SourceMeter in the dark.

**Electron-only devices**

The structure for electron-only devices is ITO/ZnO/active layer/PDINN/Ag. ZnO was spin-coated onto ITO glass. A blend in CF was spin-coated onto ZnO. PDINN (1 mg/mL) in MeOH was spin-coated onto an active layer (3000 rpm for 30 s) to form the electron transfer layer. Ag (~ 80 nm) was evaporated onto PDINN through a shadow mask (pressure ca. 10-4 Pa). *J*-*V* curves were measured by using a computerized Keithley 2400 SourceMeter in the dark.

**2. Synthesis**

All reactions dealing with air- or moisture-sensitive compounds were carried out by using standard Schlenk techniques.

**2.1 Synthetic details of PBDTT-perp**


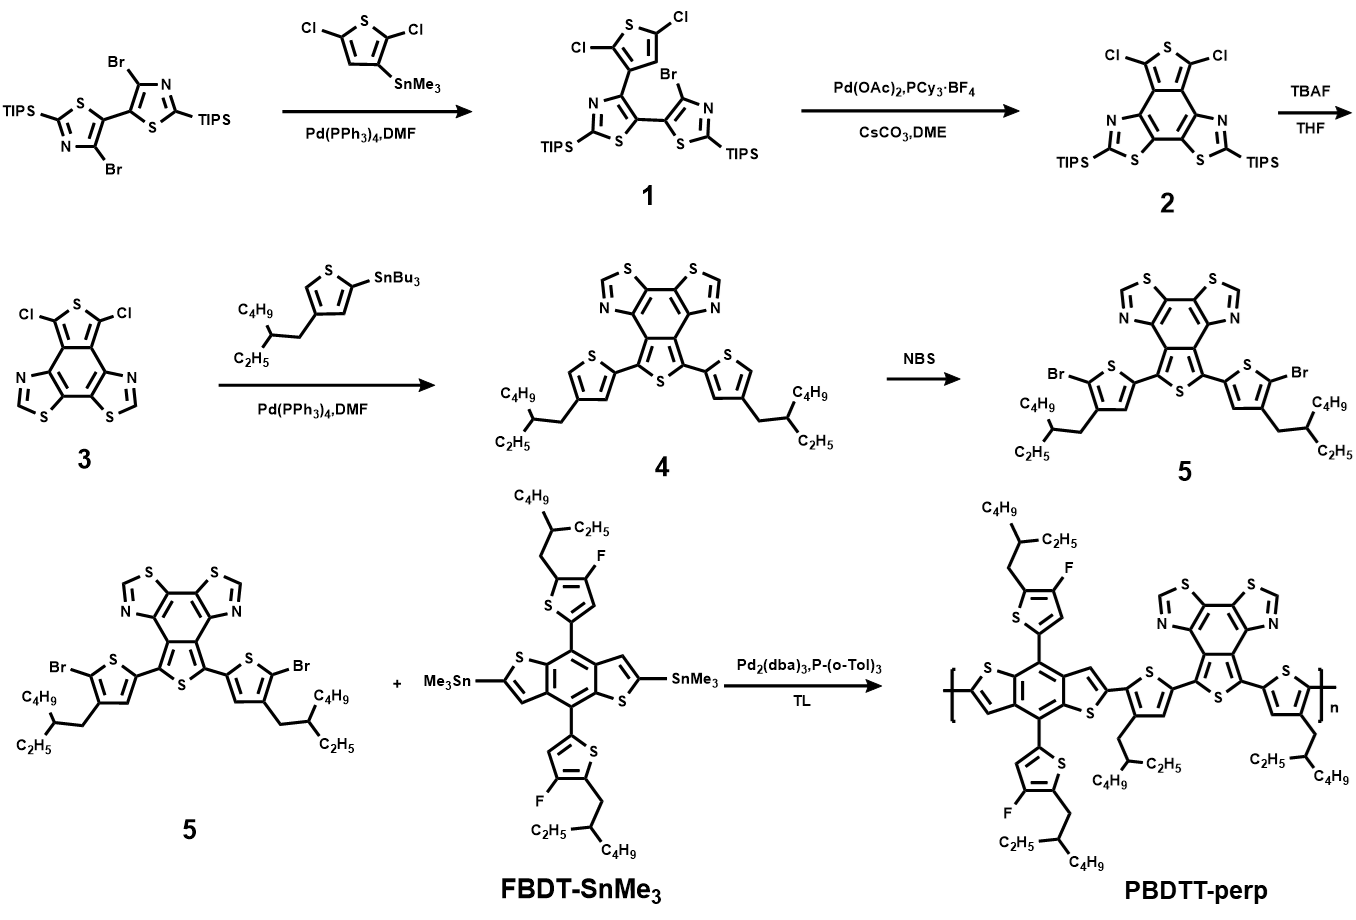


**Scheme S1** The synthetic route for PBDTT-perp.

**Compound 1:** To a solution of 4,4'-dibromo-2,2'-bis(triisopropylsilyl)-5,5'-bithiazole (1.5 g, 2.35 mmol) in anhydrous DMF (37.5 mL), (2,5-dichlorothiophen-3-yl)trimethylstannane (1.19 g, 3.76 mmol, 1.6 eq) and tetrakis(triphenylphosphine)palladium(0) (271.4 mg, 0.23 mmol, 0.1 eq) were added under argon protection. The reaction mixture was stirred at 110 °C for 12 h. After cooling to room temperature, the reaction was quenched with water, and the resulting mixture was extracted with hexane. After the solvent was evaporated under a reduced pressure, the crude product was purified by column chromatography on silica gel with hexane:dichloromethane (7:1) to give **compound 1** as yellow oil (375 mg, 23%).1H NMR (600 MHz, CDCl3): δ 6.81 (s, 1H), 1.48 (m, J = 7.5 Hz, 3H), 1.41 (sept, J = 7.5 Hz, 3H), 1.20-1.15 (m, 18H), 1.15-1.10 (m, 18H).13C NMR (151 MHz, CDCl3): δ 172.53, 171.72, 149.44, 132.28, 129.51, 127.92, 126.45, 126.35, 126.14, 125.92, 18.55, 18.40, 11.67, 11.49.

**Compound 2:** To a solution of compound 1 (370 mg, 0.52 mmol) in anhydrous 1,4-dioxane (9.5 mL), palladium(II) acetate (11.7 mg, 0.052 mmol, 0.1 eq), tricyclohexylphosphine tetrafluoroborate (38.3 mg, 0.10 mmol, 0.2 eq), and cesium carbonate (339.2 mg, 1.04 mmol, 2.0 eq) were added under argon protection. The reaction mixture was then stirred at 140 °C for 12 h. After cooling to room temperature, the reaction mixture was quenched with water, and then extracted with dichloromethane. After the solvent was evaporated under a reduced pressure, the residue was purified by column chromatography on silica gel from hexane:dichloromethane (4:1) to give **compound 2** as yellow oil (137.7 mg, 42%).1H NMR (600 MHz, CDCl3): δ 1.50 (sept, *J* = 7.5 Hz, 6H), 1.27 – 1.20 (m, 36H).13C NMR (151 MHz, CDCl3): δ 170.01, 146.20, 128.46, 127.87, 118.90, 18.57, 11.82.

**Compound 3:** To a solution of compound 2 (130 mg, 0.21 mmol) in anhydrous THF (2.0 mL), tetrabutylammonium fluoride (1.56 mL, 1.56 mmol) was added dropwise under argon protection. The reaction mixture was then stirred for 10 min. The reaction was quenched with water and then extracted with dichloromethane. The solvent was evaporated under a reduced pressure, a dark yellow solid **compound 3** is obtained. Due to its low solubility, this residue could not be purified by column separation (62.2 mg, 95%). 1H NMR (600 MHz, CDCl3): δ 9.08 (s, 2H). We can’t get 13C NMR signal as its low solubility.

**Compound 4:** A solution of compound 3 (60 mg, 0.19 mmol), tributyl(4-(2-ethylhexyl)thiophen-2-yl)stannane (227 mg, 0.57 mmol, 3.0 eq) and tetrakis(triphenylphosphine)palladium(0) (22 mg, 0.019 mmol) in 2 mL of a mixed solvent of anhydrous toluene and anhydrous DMF (1:1) was stirred under argon protection at 110 °C for 4 h. After cooling to room temperature, the reaction was quenched with water and extracted with hexane. After the solvent was evaporated under a reduced pressure, the crude product was purified by column chromatography on silica gel with hexane: dichloromethane (3:1) to give **compound 4** as yellow wax (130.4 mg, 92%). 1H NMR (600 MHz, CDCl3): δ 8.89 (s, 2H), 7.47 (s, 2H), 7.02 (s, 2H), 2.62 (d, *J* = 6.7 Hz, 4H), 1.71 – 1.68 (m, 2H), 1.38 – 1.24 (m, 16H), 0.99 – 0.79 (m, 12H). 13C NMR (151 MHz, CDCl3): δ 150.36, 145.98, 142.19, 134.42, 131.65, 130.31, 128.62, 124.12, 122.83, 38.89, 35.81, 33.73, 29.78, 26.71, 23.13, 22.82, 14.19.

**Compound 5(monomer-perp):** To a solution of compound 4 (130 mg, 0.17 mmol) in chloroform (5 mL), NBS (55.6 mg, 0.31 mmol, 1.8 eq) was added. The reaction mixture was then stirred for 12 h, and water was added. The mixture was extracted with chloroform, and the organic layer was evaporated under a reduced pressure. The crude product was purified by column chromatography on silica gel with hexane:chloroform (8:1) to give **compound 5** as yellow solid (115 mg, 73%). 1H NMR (600 MHz, CDCl3): δ 7.85 (s, 2H), 6.95 (s, 2H), 2.50 (d, *J* = 7.2 Hz, 4H), 1.72 – 1.69 (m, 2H), 1.40-1.20 (m, 16H), 0.95-0.80 (m, 12H). 13C NMR (151 MHz, CDCl3): δ 150.69, 142.61, 136.72, 135.52, 133.27, 129.55, 126.33, 119.52, 110.27, 38.55, 34.24, 33.34, 31.87, 29.71, 26.54, 22.32, 14.17. MALDI-TOF MS (m/z): 795.7 (M+H+).

Polymerization of **PBDTT-perp:** Compound 5 (40.9 mg, 0.045 mmol), FBDT monomer (42.4 mg, 0.045 mmol, 1.0 eq), Pd2(dba)3 (1.3 mg, 0.05 eq), P(o-tol)3 (2.7 mg, 0.2 eq) and 0.95 mL of anhydrous toluene were added to a Schlenk tube. The tube was charged with argon through a freeze-pump-thaw cycle three times. The mixture was stirred for 12 hours at 110 ℃, and then the mixture was precipitated into methanol (100 mL). The precipitate was filtered and purified via Soxhlet extraction for 1 hour with methanol, 2 hours with hexane. The low molecular weight polymer was collected with hot chloroform, and the high molecular weight component finally was collected with hot chlorobenzene. The solution was then concentrated and precipitated into methanol (100 mL) to give **PBDTT-perp** as a dark red solid with a yield of 64%. The *M*n for PBDTT-perp is 49.5 kDa, with a PDI of 1.67. 1H NMR (600 MHz, CDCl3): 7.43-7.14 (br, aromatic protons), 4.20-2.61 (br, aliphatic protons), 2.28-0.69 (br, aliphatic protons).

**2.2 Synthetic details of PBDTT-cent**


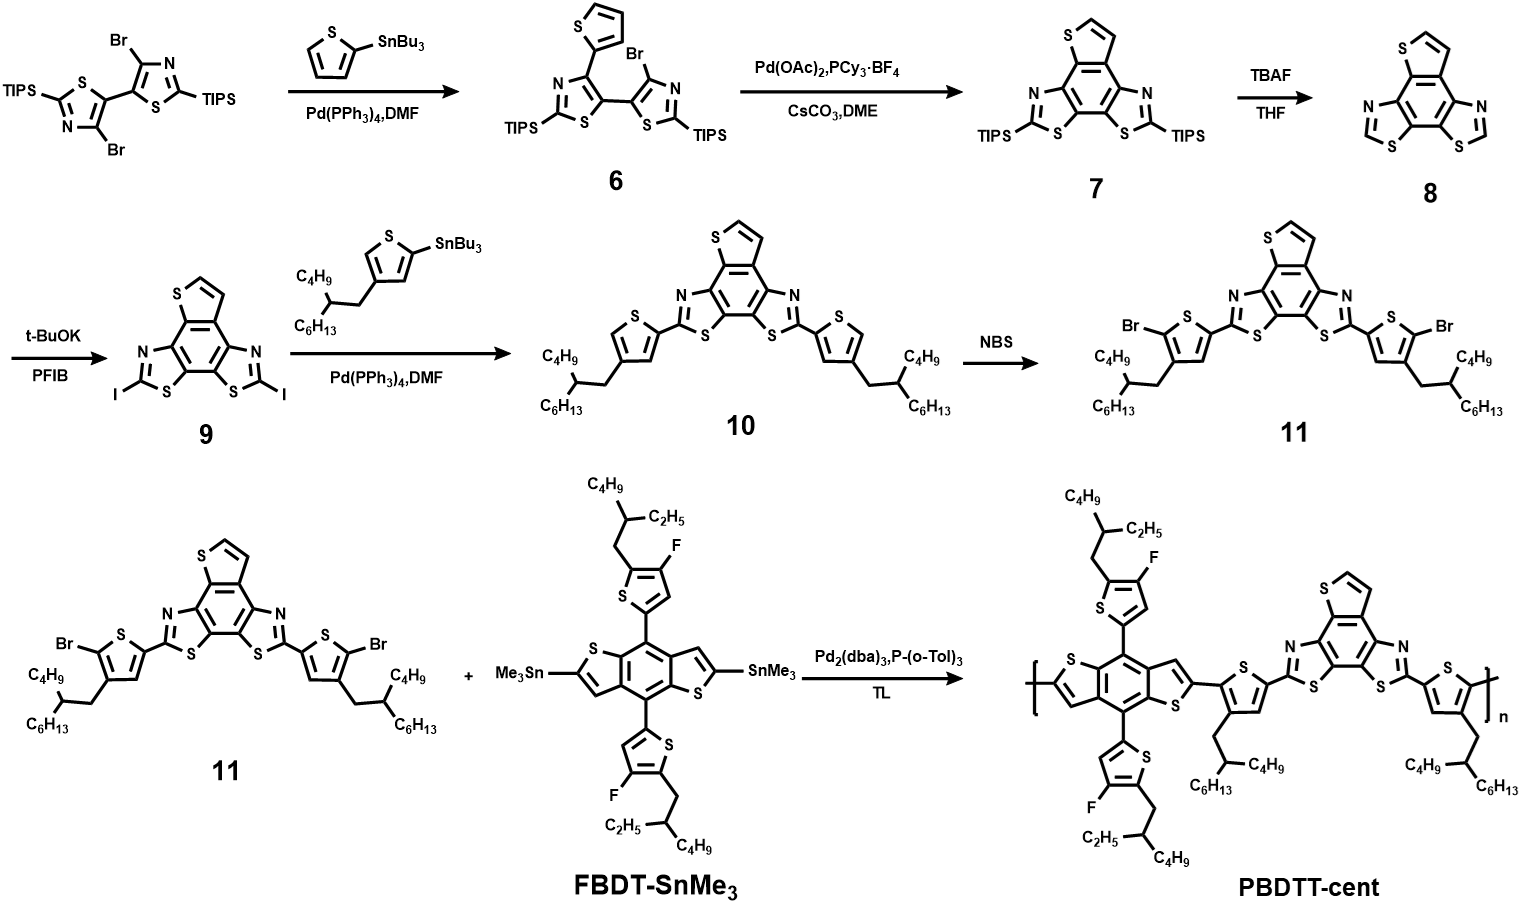


**Scheme S2** The synthetic route for PBDTT-cent.

**Compound 6.** To a solution of 4,4'-dibromo-2,2'-bis(triisopropylsilyl)-5,5'-bithiazole (1.5 g, 2.35 mmol) in anhydrous DMF (37.5 mL), tributyl(thiophen-2-yl)stannane (1.41 g, 3.76 mmol, 1.6 eq) and tetrakis(triphenylphosphine)palladium(0) (271.4 mg, 0.23 mmol, 0.1 eq) were added under argon protection. The reaction mixture was stirred at 110 °C for 12 h. After cooling to room temperature, the reaction was quenched with water, and the resulting mixture was extracted with hexane. After the solvent was evaporated under a reduced pressure, the crude product was purified by column chromatography on silica gel with hexane:dichloromethane (7:1) to give **compound 6** as colorless oil (529 mg, 36%). 1H NMR (600 MHz, CDCl3): δ 7.25 (d, *J* = 5.4 Hz, 1H), 7.12 (d, *J* = 3.8 Hz, 1H), 6.98 – 6.93 (m, 1H), 1.50 – 1.44 (m, 6H), 1.21 (d, *J* = 7.9 Hz, 18H), 1.17 (dd, *J* = 8.0, 3.5 Hz, 18H). 13C NMR (151 MHz, CDCl3): δ 174.40, 172.15, 150.97, 137.52, 131.37, 127.35, 126.54, 126.19, 125.82, 119.62, 18.58, 18.49, 11.69, 11.55.

**Compound 7.** To a solution of compound 6 (330 mg, 0.52 mmol) in anhydrous 1,4-dioxane (10 mL), palladium(II) acetate (11.7 mg, 0.052 mmol, 0.1 eq), tricyclohexylphosphine tetrafluoroborate (38.3 mg, 0.10 mmol, 0.2 eq), and cesium carbonate (339.2 mg, 1.04 mmol, 2.0 eq) were added under argon protection. The reaction mixture was then stirred at 140 °C for 12 h. After cooling to room temperature, the reaction mixture was quenched with water and then extracted with dichloromethane. After the solvent was evaporated under a reduced pressure, the residue was purified by column chromatography on silica gel from hexane:dichloromethane (4:1) to give **compound 7** as pale-yellow oil (140 mg, 48%). 1H NMR (600 MHz, CDCl3) δ 8.17 (d, *J* = 5.3 Hz, 1H), 7.63 (t, *J* = 5.2 Hz, 1H), 1.56 (dqd, *J* = 14.8, 7.5, 2.1 Hz, 6H), 1.22 (t, *J* = 7.1 Hz, 36H). 13C NMR (151 MHz, CDCl3) δ 172.27, 171.26, 149.56, 148.52, 133.46, 132.55, 126.04, 125.05, 123.46, 18.61, 18.60, 11.83, 11.81.

**Compound 8.** To a solution of compound 7 (120 mg, 0.21 mmol) in anhydrous THF (2.0 mL), tetrabutylammonium fluoride (1.56 mL, 1.56 mmol) was added dropwise under argon protection. The reaction mixture was then stirred for 10 min. The reaction was quenched with water, and then extracted with dichloromethane. The combined organic layer was dried over anhydrous Na2SO4. After removal of the solvent, the crude product was purified via column chromatography (silica gel) by using CH2Cl2 as eluent. The solvent was evaporated under a reduced pressure, a dark yellow solid **compound 8** is obtained (39 mg, 74%). 1H NMR (600 MHz, CDCl3): δ 9.13 (d, *J* = 10.7 Hz, 2H), 8.13 (d, *J* = 5.3 Hz, 1H), 7.71 (d, *J* = 5.3 Hz, 1H). 13C NMR (151 MHz, CDCl3): δ 154.33, 152.56, 147.40, 146.56, 134.99, 133.12, 127.18, 123.62, 122.94, 122.83.

**Compound 9.** To a solution of compound 8 (124 mg, 0.5 mmol) and t-BuOK (224 mg, 2 mmol) in anhydrous THF (10 mL) was added [2,3,4,5,6-Pentafluoro-1-iodobenzene](https://www.chembk.com/en/chem/2,3,4,5,6-Pentafluoro-1-iodobenzene) (323 mg, 1.1 mmol) by droplet at 0℃ and stirred for 1h. Then the mixture was heated to room temperature and stirred for another 2h. The mixture was poured into water and extracted with dichloromethane. The solvent was evaporated under a reduced pressure, a yellow solid **compound 9** is obtained. Due to its low solubility, this residue could not be purified by column separation (242 mg, 97%).1H NMR (600 MHz, CDCl3): δ 8.00 (d, *J* = 5.4 Hz, 1H), 7.65 (d, *J* = 5.4 Hz, 1H). We can’t get 13C NMR signal as its low solubility.

**Compound 10.** A solution of compound 9 (95 mg, 0.19 mmol), tributyl(4-(2-butyloctyl)thiophen-2-yl)stannane (308 mg, 0.57 mmol, 3.0 eq) and tetrakis(triphenylphosphine)palladium(0) (22 mg, 0.019 mmol) in 2 mL of a mixed solvent of anhydrous toluene and anhydrous DMF (1:1) was stirred under argon protection at 110 °C for 4 h. After cooling to room temperature, the reaction was quenched with water and extracted with hexane. After the solvent was evaporated under a reduced pressure, the crude product was purified by column chromatography on silica gel with hexane: dichloromethane (4:1) to give **compound 10** as yellow oil (127 mg, 89%).1H NMR (600 MHz, CDCl3): δ 8.00 (d, *J* = 5.5 Hz, 1H), 7.93 (d, *J* = 5.5 Hz, 1H), 7.79 (d, *J* = 0.7 Hz, 1H), 7.69 (d, *J* = 0.7 Hz, 1H), 7.14 (d, *J* = 3.7 Hz, 2H), 2.64 (dd, *J* = 8.8, 7.1 Hz, 4H), 1.72 – 1.67 (m, 2H), 1.31 (ddd, *J* = 16.1, 10.1, 6.5 Hz, 32H), 0.91 – 0.85 (m, 12H). 13C NMR (151 MHz, CDCl3) δ 148.90, 148.70, 143.01, 142.99, 139.79, 139.77, 135.75, 133.51, 132.65, 130.06, 129.60, 125.36, 125.00, 123.31, 39.00, 38.98, 35.05, 35.03, 33.38, 33.06, 31.95, 31.93, 29.73, 28.95, 28.91, 27.86, 26.90, 26.69, 26.67, 23.09, 22.71, 17.54, 14.26, 14.24, 14.14, 13.62.

**Compound 11(monomer-cent).** To a solution of compound 10 (127 mg, 0.17 mmol) in chloroform (5 mL), NBS (55.6 mg, 0.31 mmol, 1.8 eq) was added. The reaction mixture was then stirred for 12 h, and water was added. The mixture was extracted with chloroform, and the organic layer was evaporated under a reduced pressure. The crude product was purified by column chromatography on silica gel with hexane:chloroform (6:1) to give **compound 11** as yellow wax (115 mg, 77%).1H NMR (600 MHz, CDCl3): δ 7.96 (dd, *J* = 12.9, 5.5 Hz, 2H), 7.63 (s, 1H), 7.54 (s, 1H), 2.60 (dd, *J* = 7.1, 4.8 Hz, 4H), 1.70 (d, *J* = 4.0 Hz, 2H), 1.26 (s, 32H), 0.93 (dd, *J* = 7.4, 5.5 Hz, 12H). 13C NMR (151 MHz, CDCl3): δ 149.37, 149.25, 143.48, 143.46, 140.27, 140.25, 136.22, 133.96, 133.11, 130.52, 130.07, 125.80, 125.46, 123.78, 39.46, 39.44, 35.52, 35.50, 33.84, 33.53, 32.44, 32.42, 30.18, 29.40, 29.38, 28.33, 27.36, 27.32, 27.22, 27.15, 23.55, 23.17, 18.02, 14.65, 14.63, 14.60, 14.09. MALDI-TOF MS (m/z): 906.3 (M+).

Polymerization of **PBDTT-cent:** Compound 5 (40.9 mg, 0.045 mmol), FBDT monomer (42.4 mg, 0.045 mmol, 1.0 eq), Pd2(dba)3 (1.3 mg, 0.05 eq), P(o-tol)3 (2.7 mg, 0.2 eq) and 0.95 mL of anhydrous toluene were added to a Schlenk tube. The tube was charged with argon through a freeze-pump-thaw cycle three times. The mixture was stirred for 12 hours at 110 ℃, and then the mixture was precipitated into methanol (100 mL). The precipitate was filtered and purified via Soxhlet extraction for 1 hour with methanol, 2 hours with hexane. The low molecular weight polymer was collected with hot chloroform, and the high molecular weight component finally was collected with hot chlorobenzene. The solution was then concentrated and precipitated into methanol (100 mL) to give **PBDTT-cent** as a dark red solid with a yield of 74%. The *M*n for PBDTT-cent is 65.7 kDa, with a PDI of 1.98. 1H NMR (600 MHz, CDCl3): 7.38-7.03 (br, aromatic protons), 4.20-2.58 (br, aliphatic protons), 2.28-0.64 (br, aliphatic protons).

**3. Nuclear Magnetic Resonance Spectra**

**
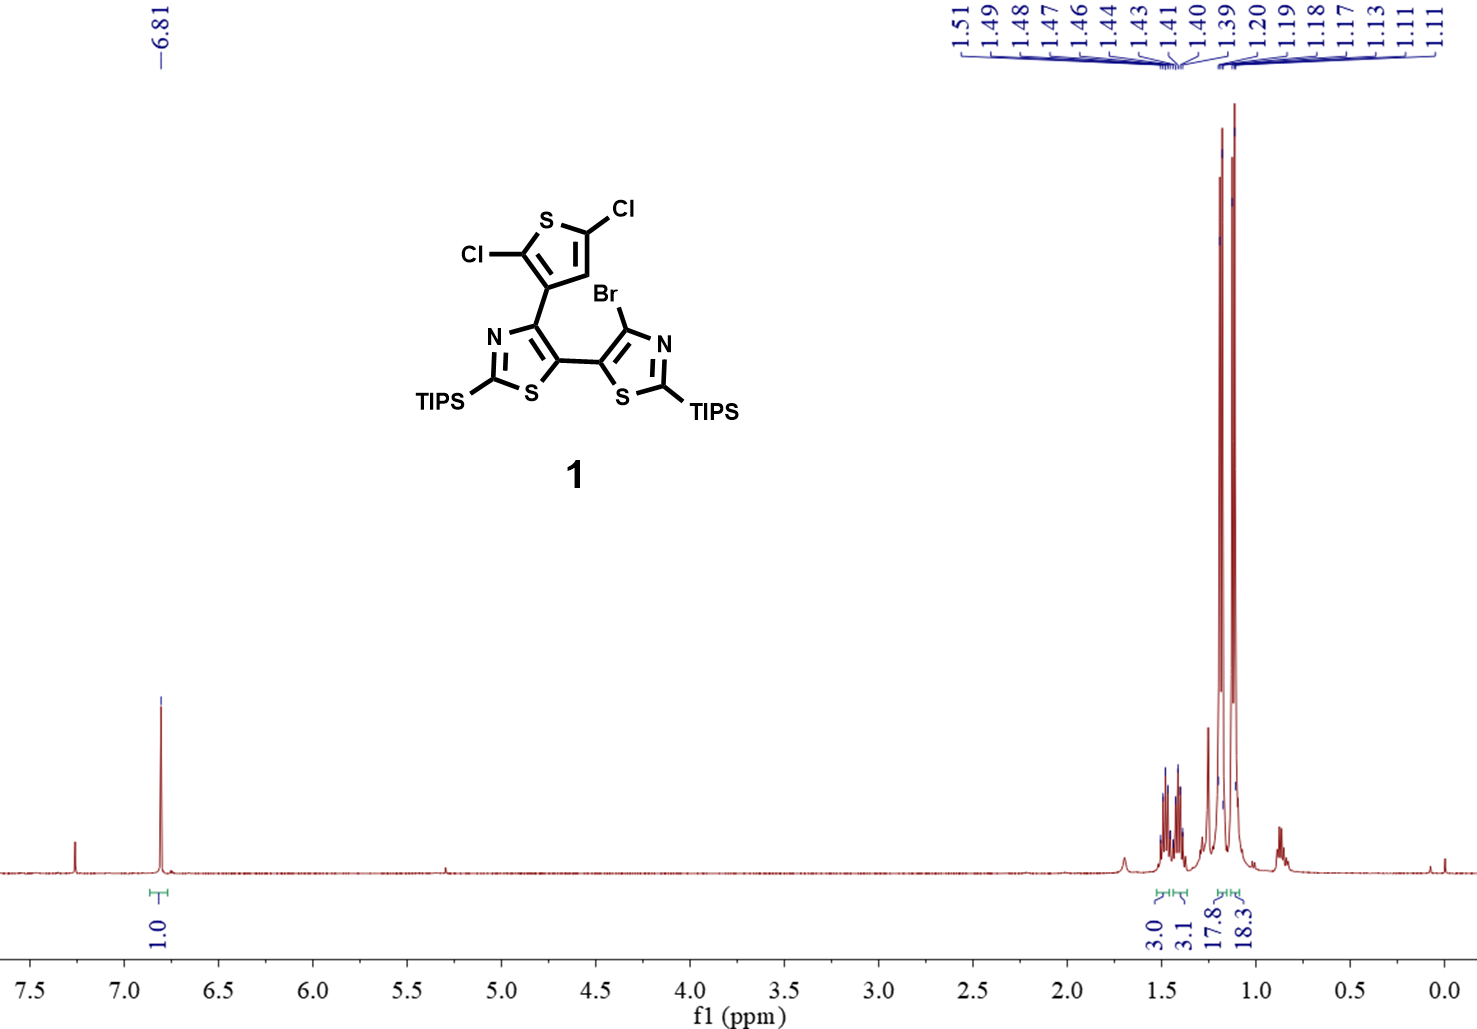
**

**Fig. S1** 1H NMR spectrum of **compound 1**.


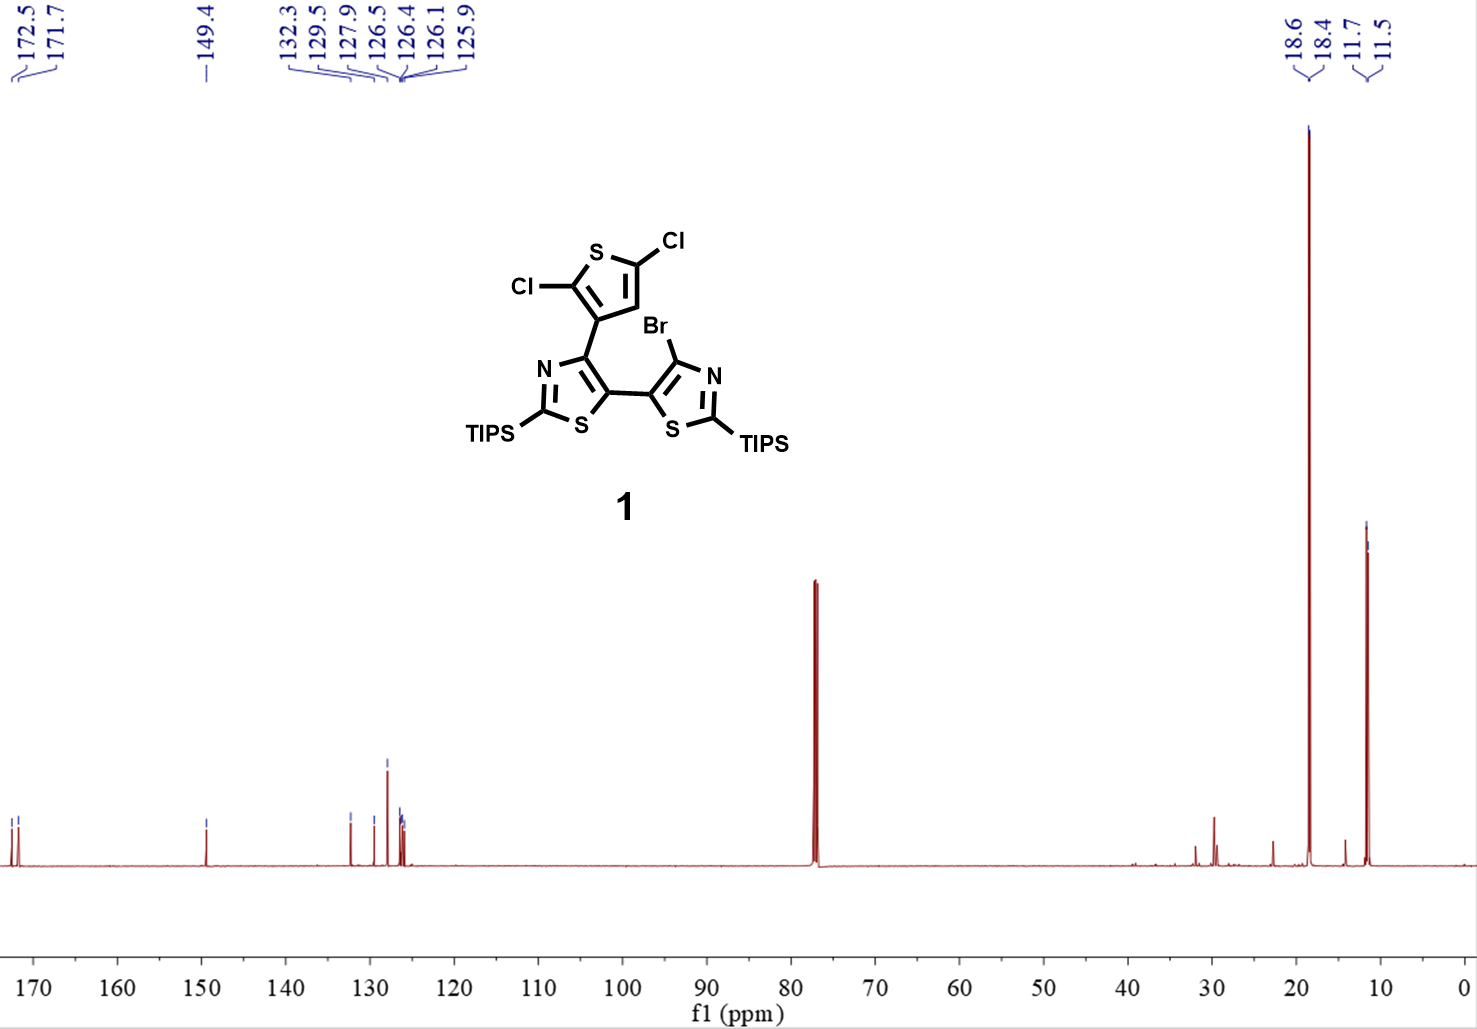


**Fig. S2** 13C NMR spectrum of **compound 1**.


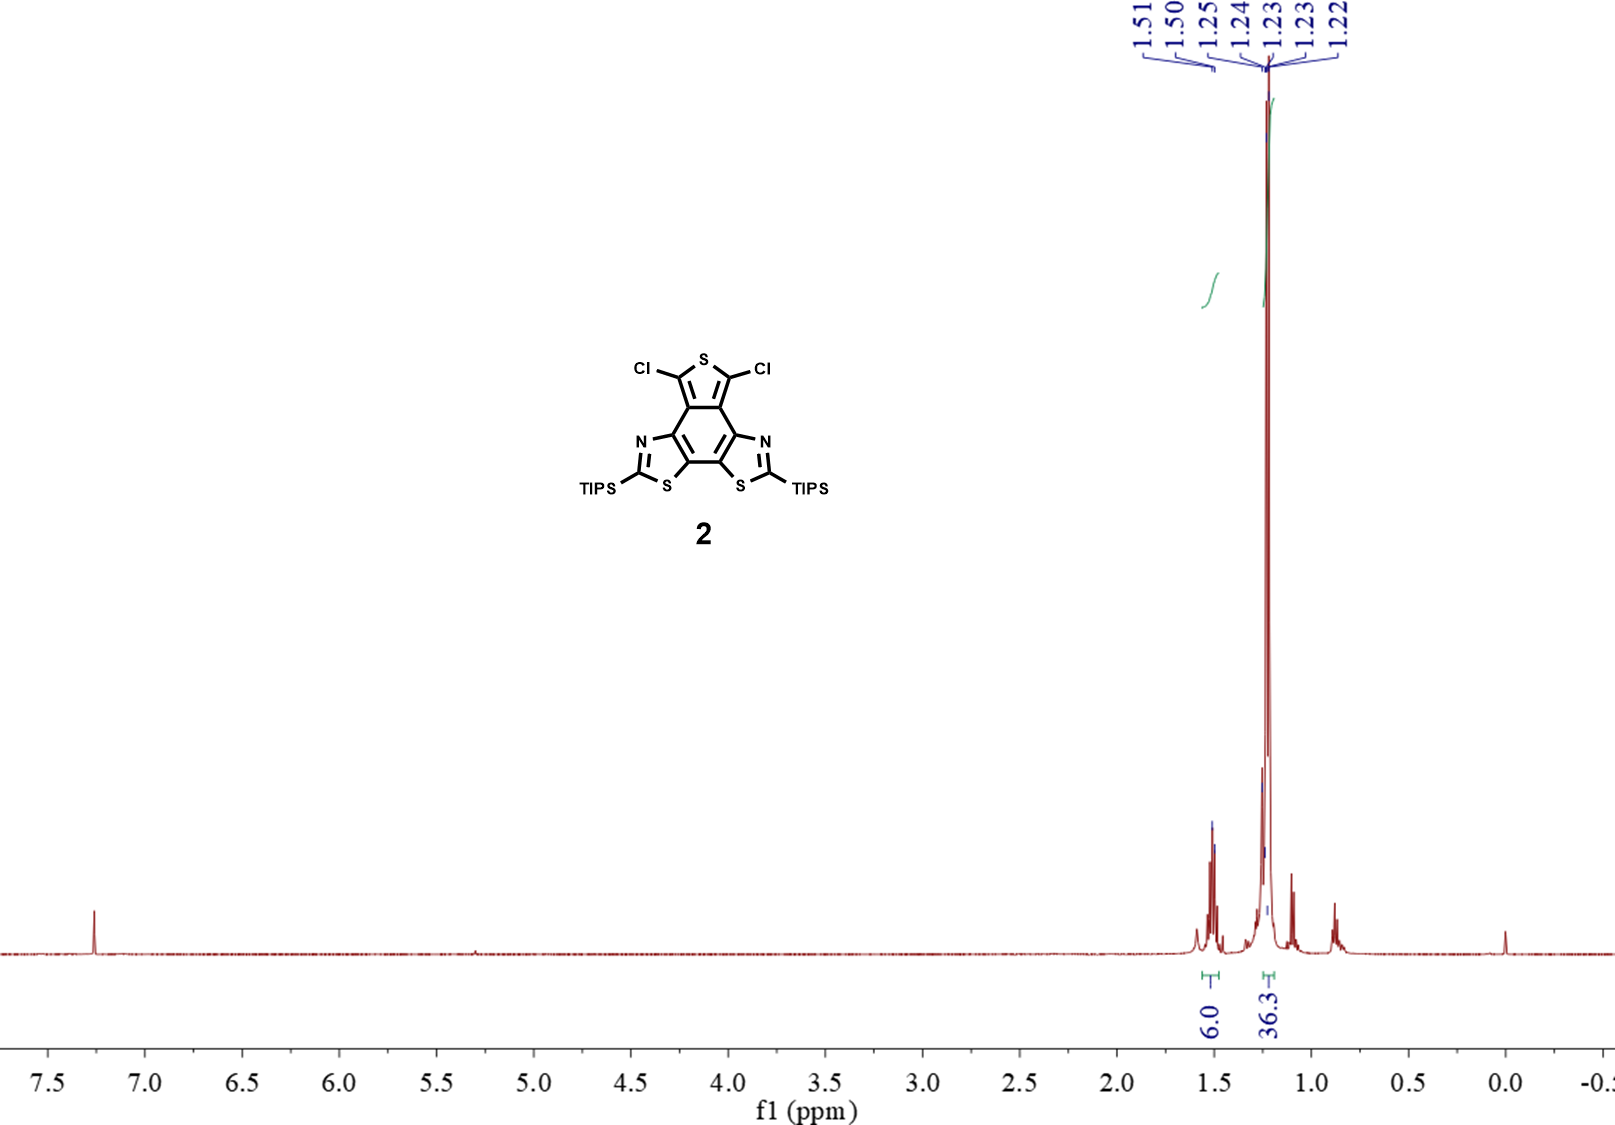


**Fig. S3** 1H NMR spectrum of **compound 2**.


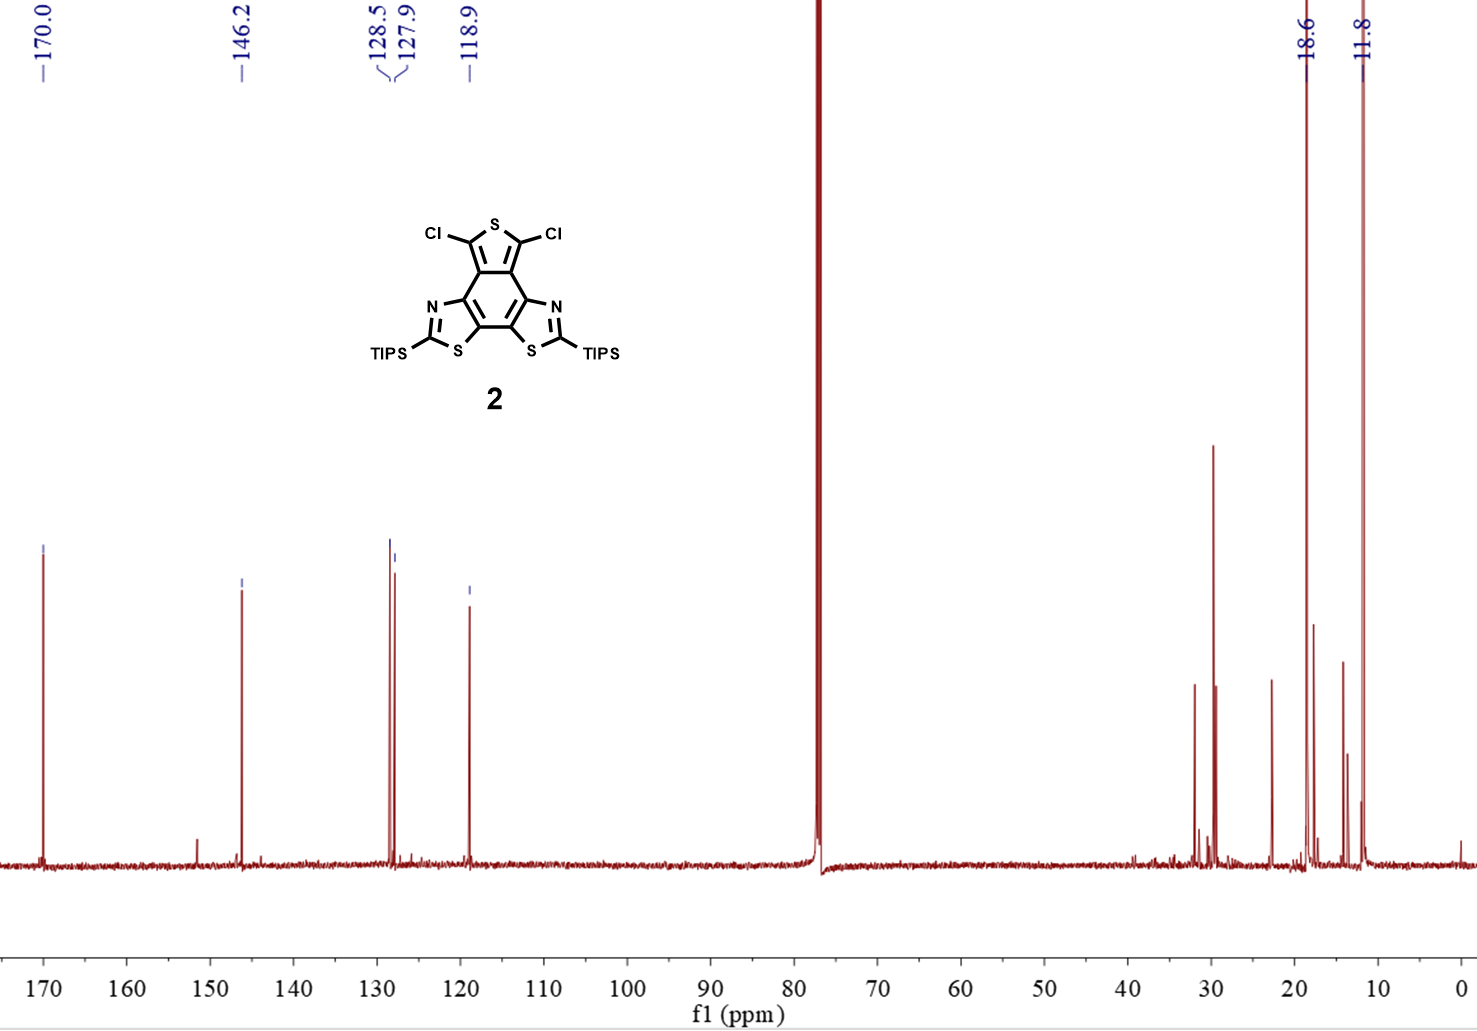


**Fig. S4** 13C NMR spectrum of **compound 2**.


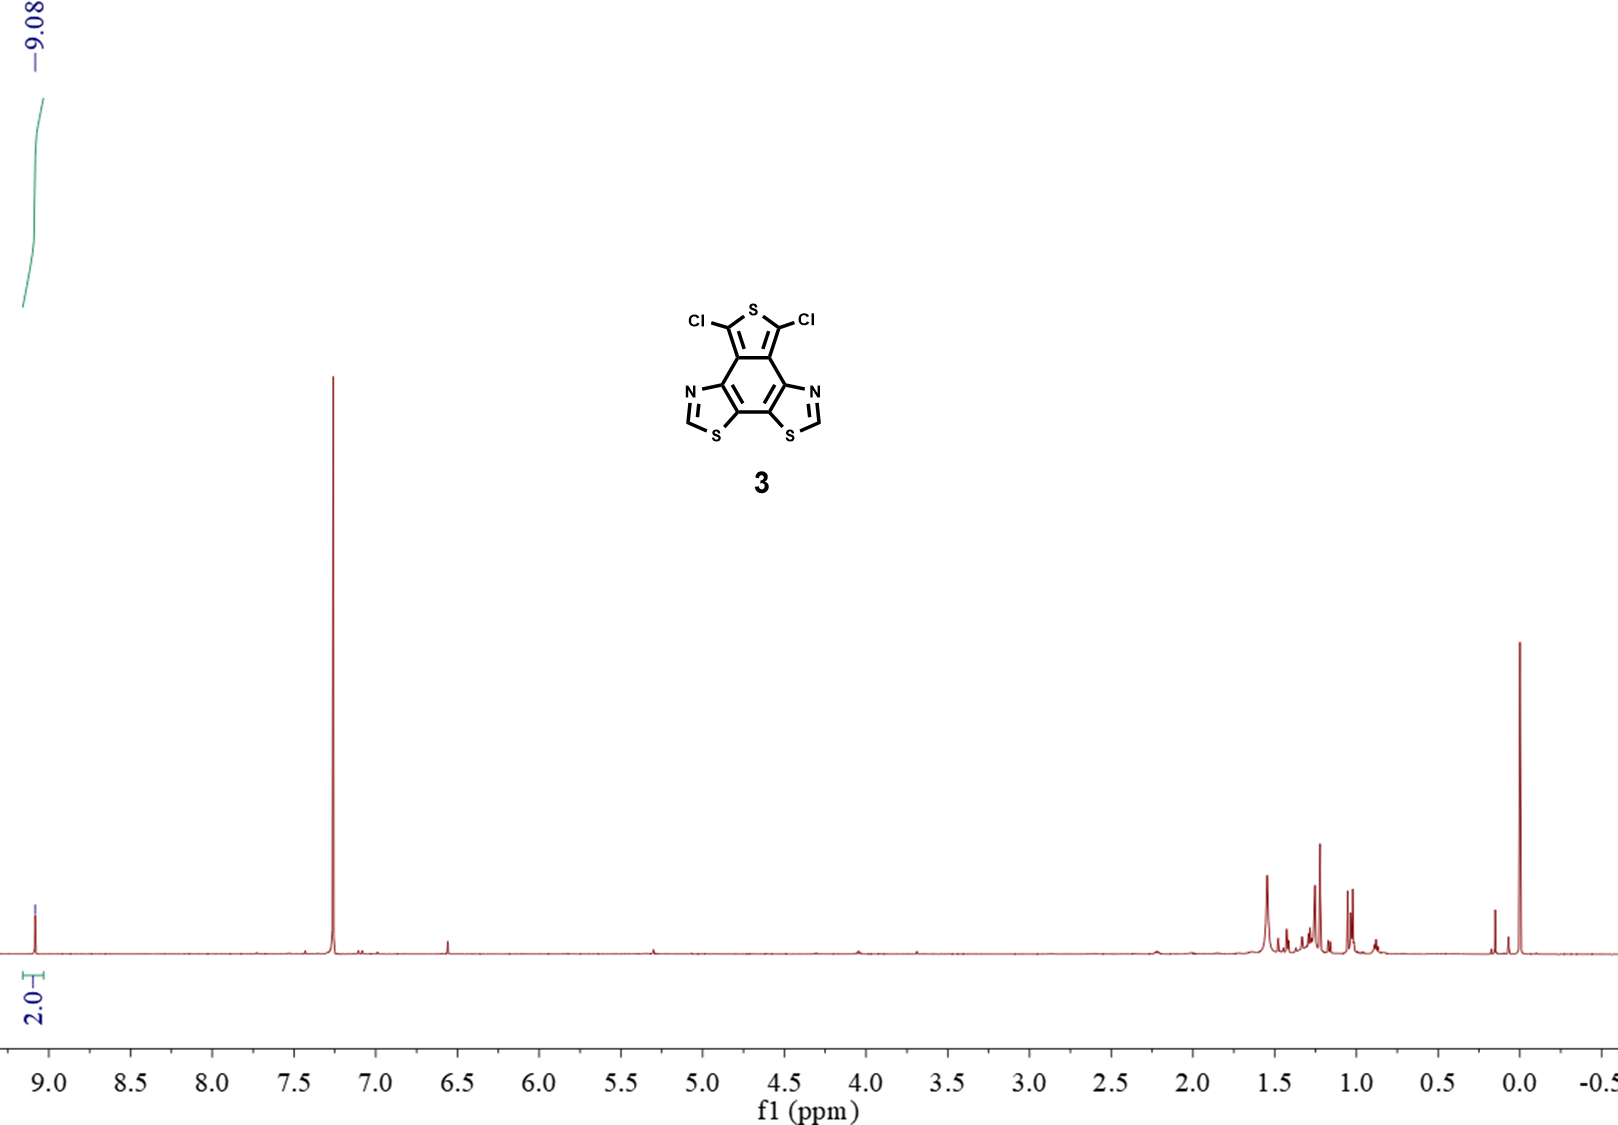


**Fig. S5** 1H NMR spectrum of **compound 3**.


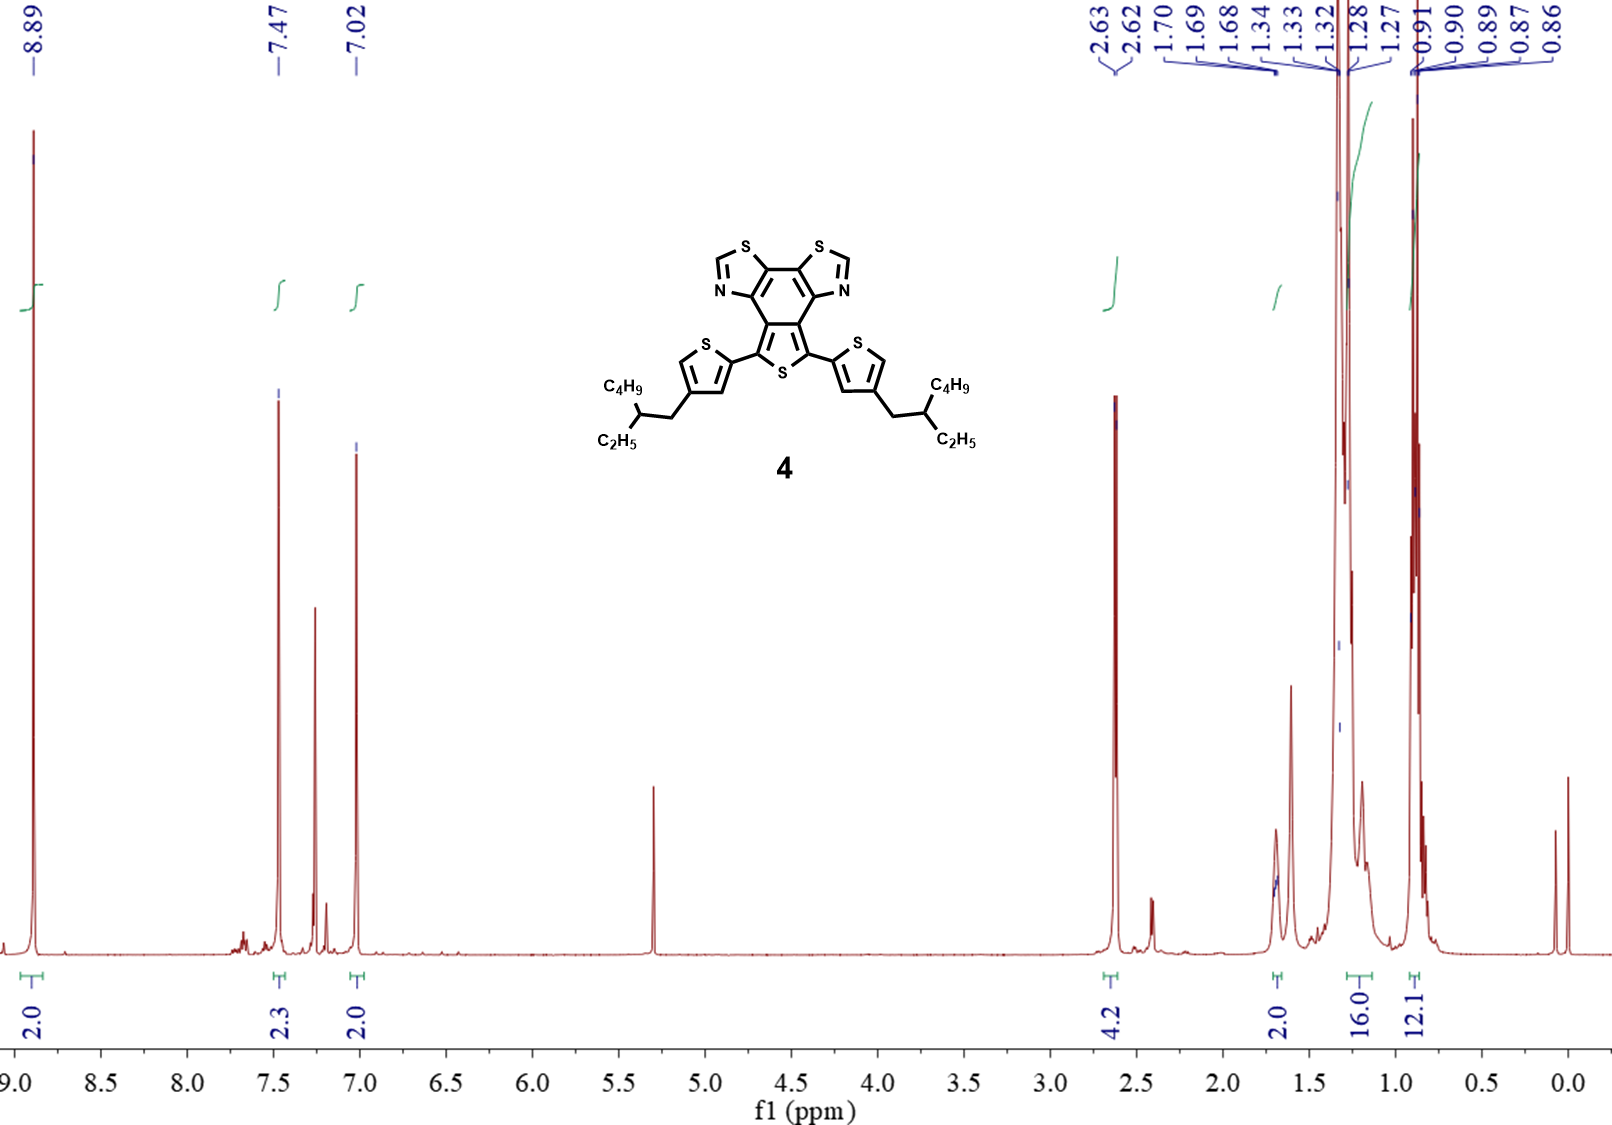


**Fig. S6** 1H NMR spectrum of **compound 4**.


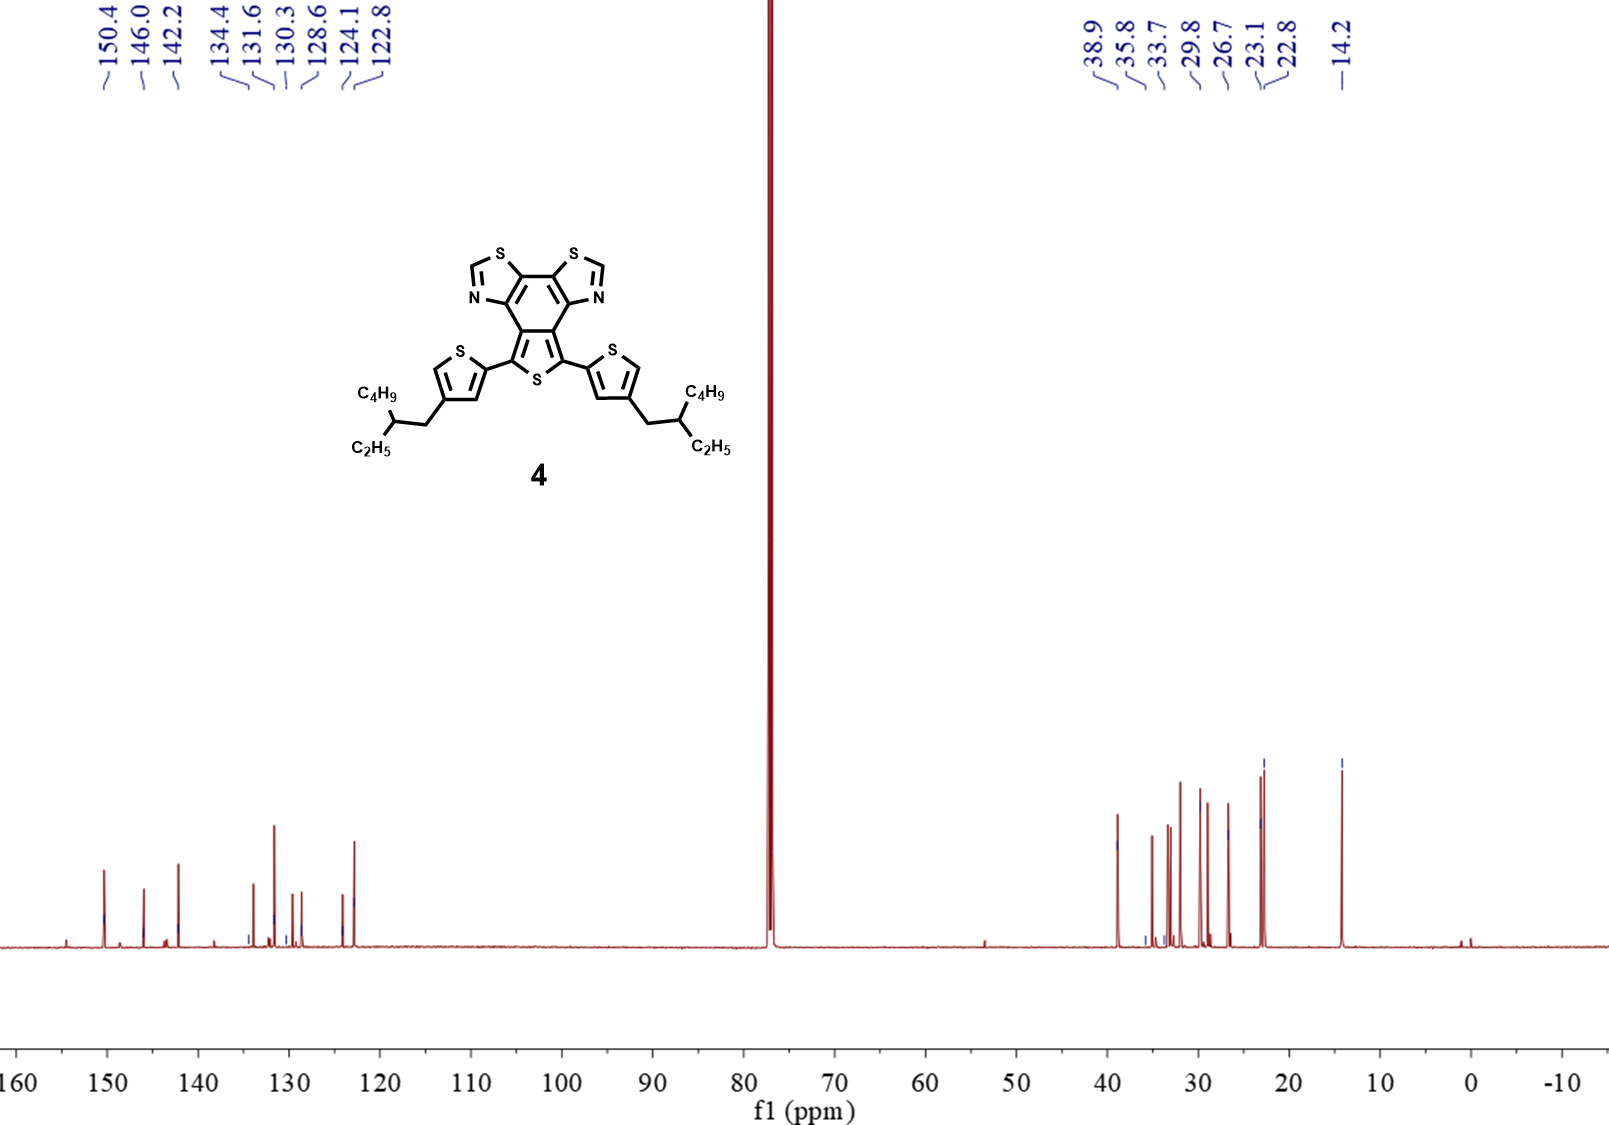


**Fig. S7** 13C NMR spectrum of **compound 4**.


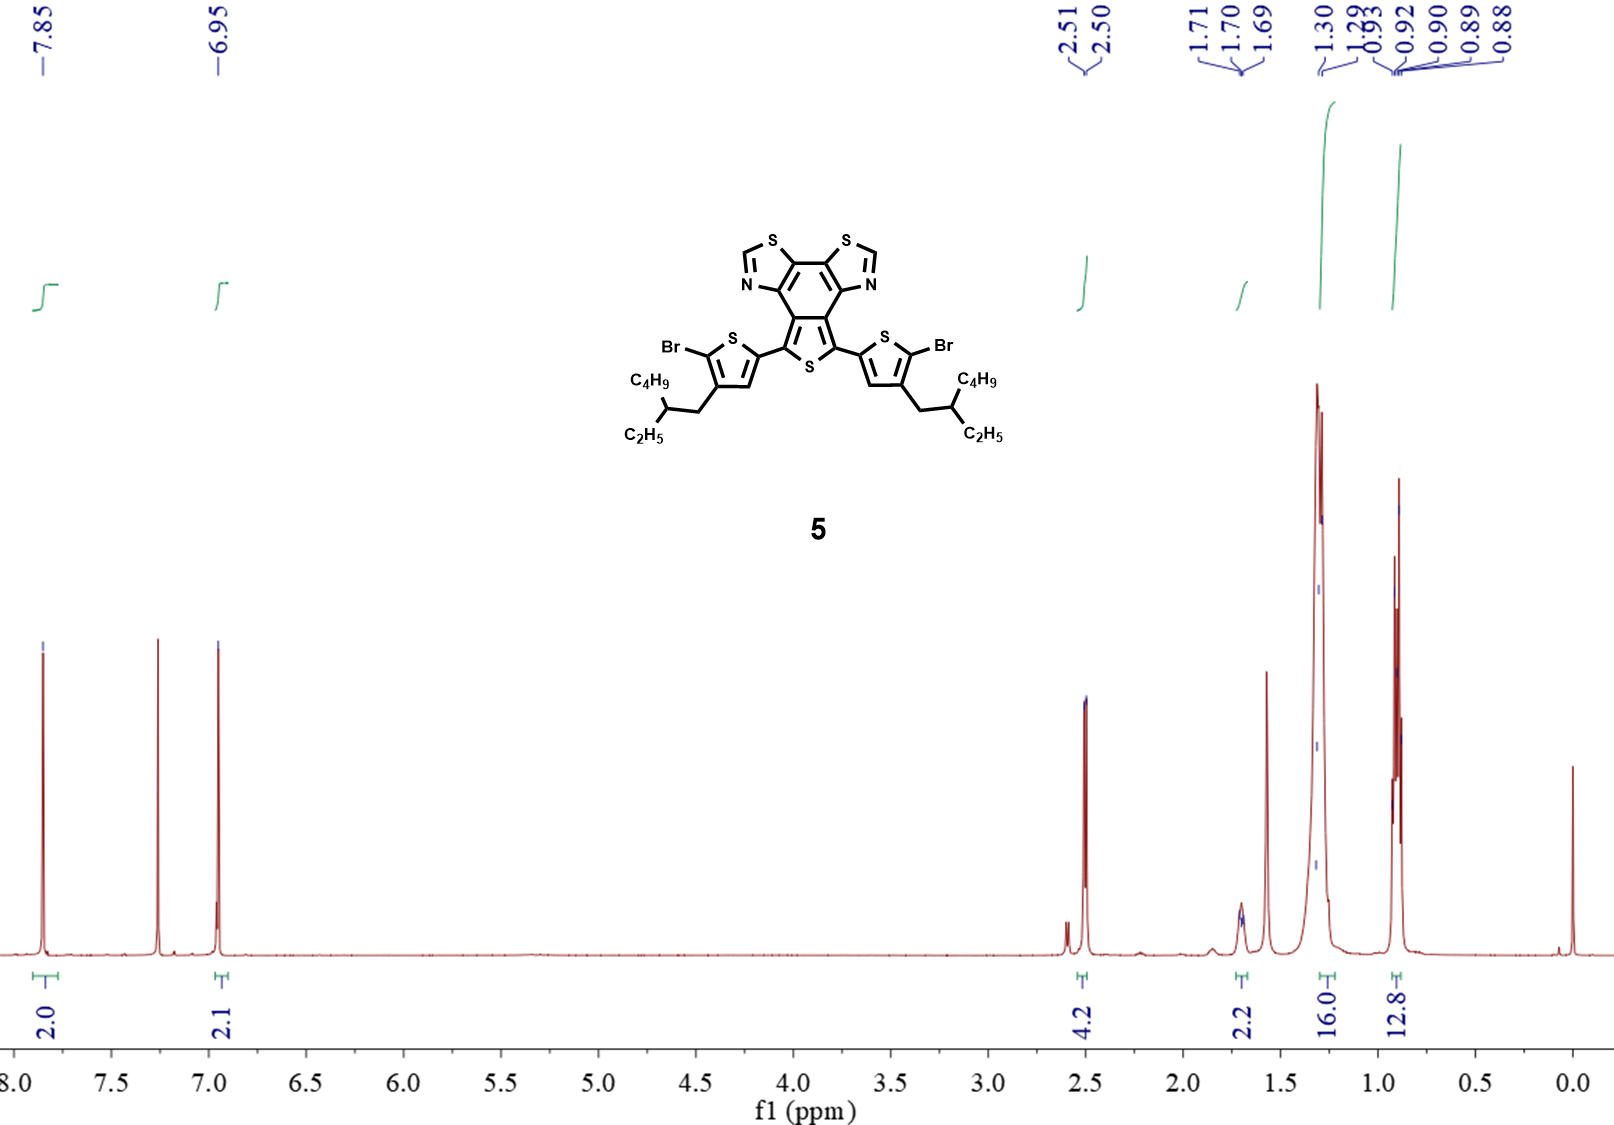


**Fig. S8** 1H NMR spectrum of **compound 5**.


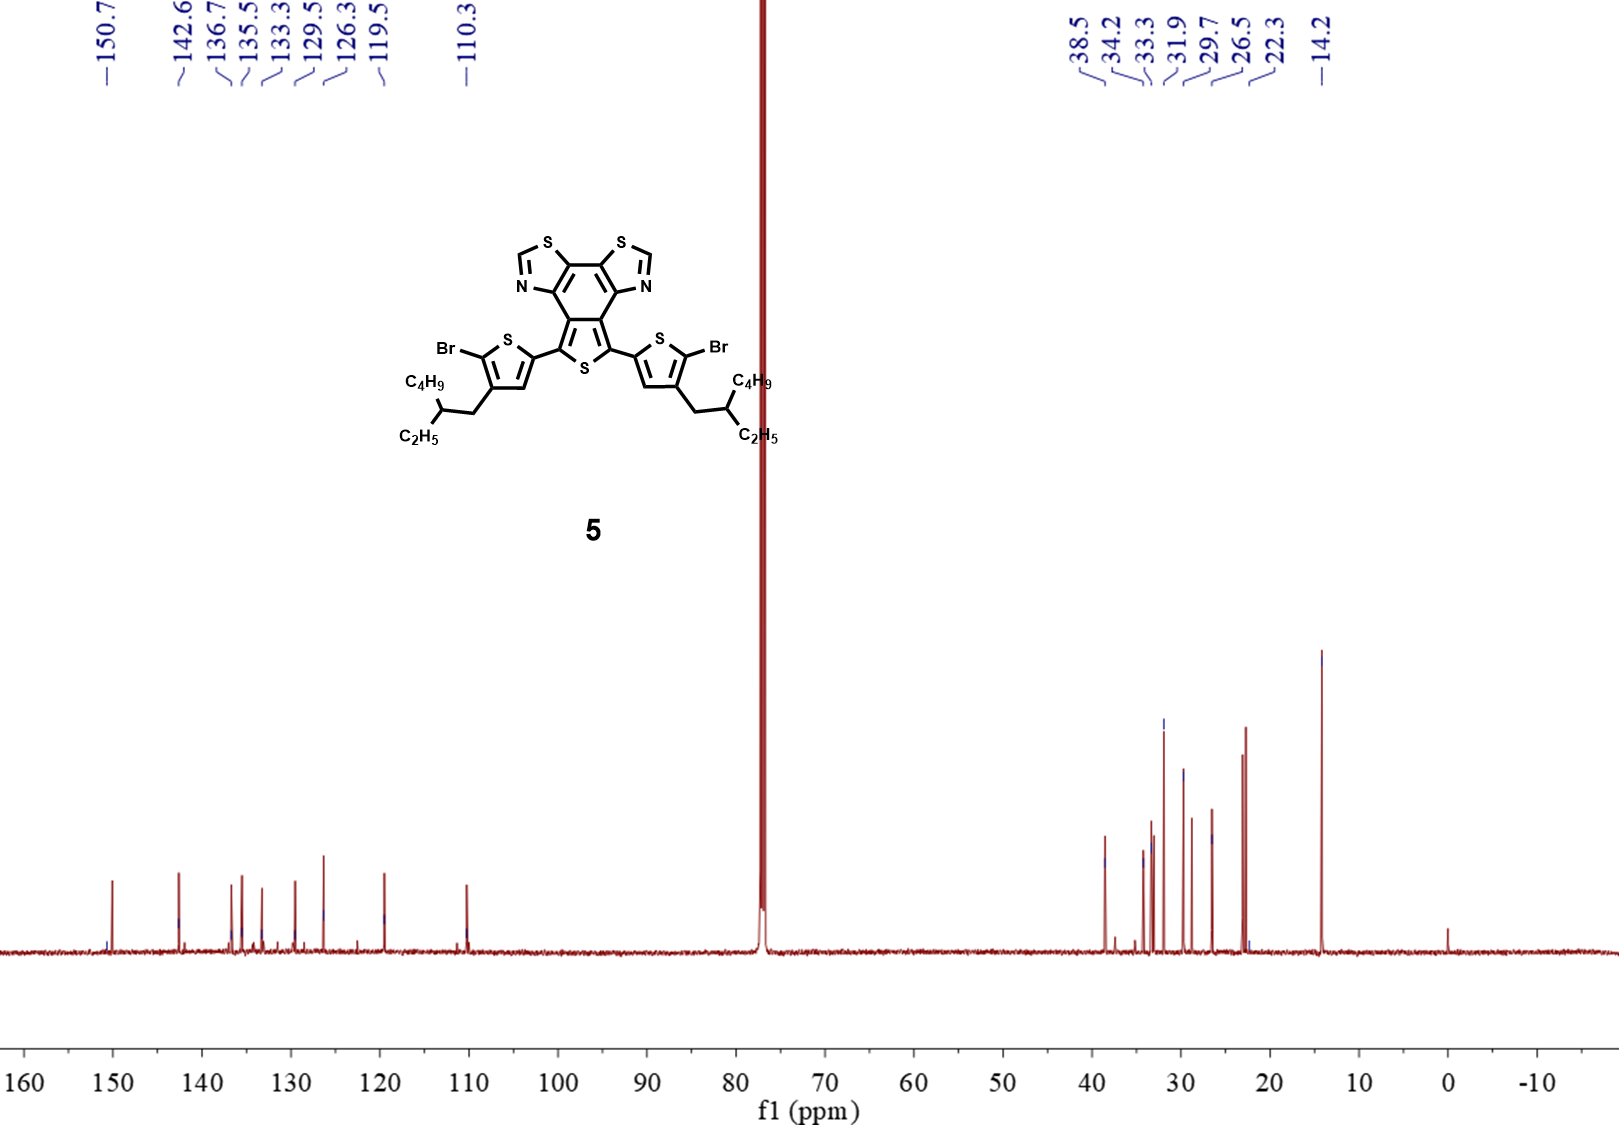


**Fig. S9** 13C NMR spectrum of **compound 5**.

**
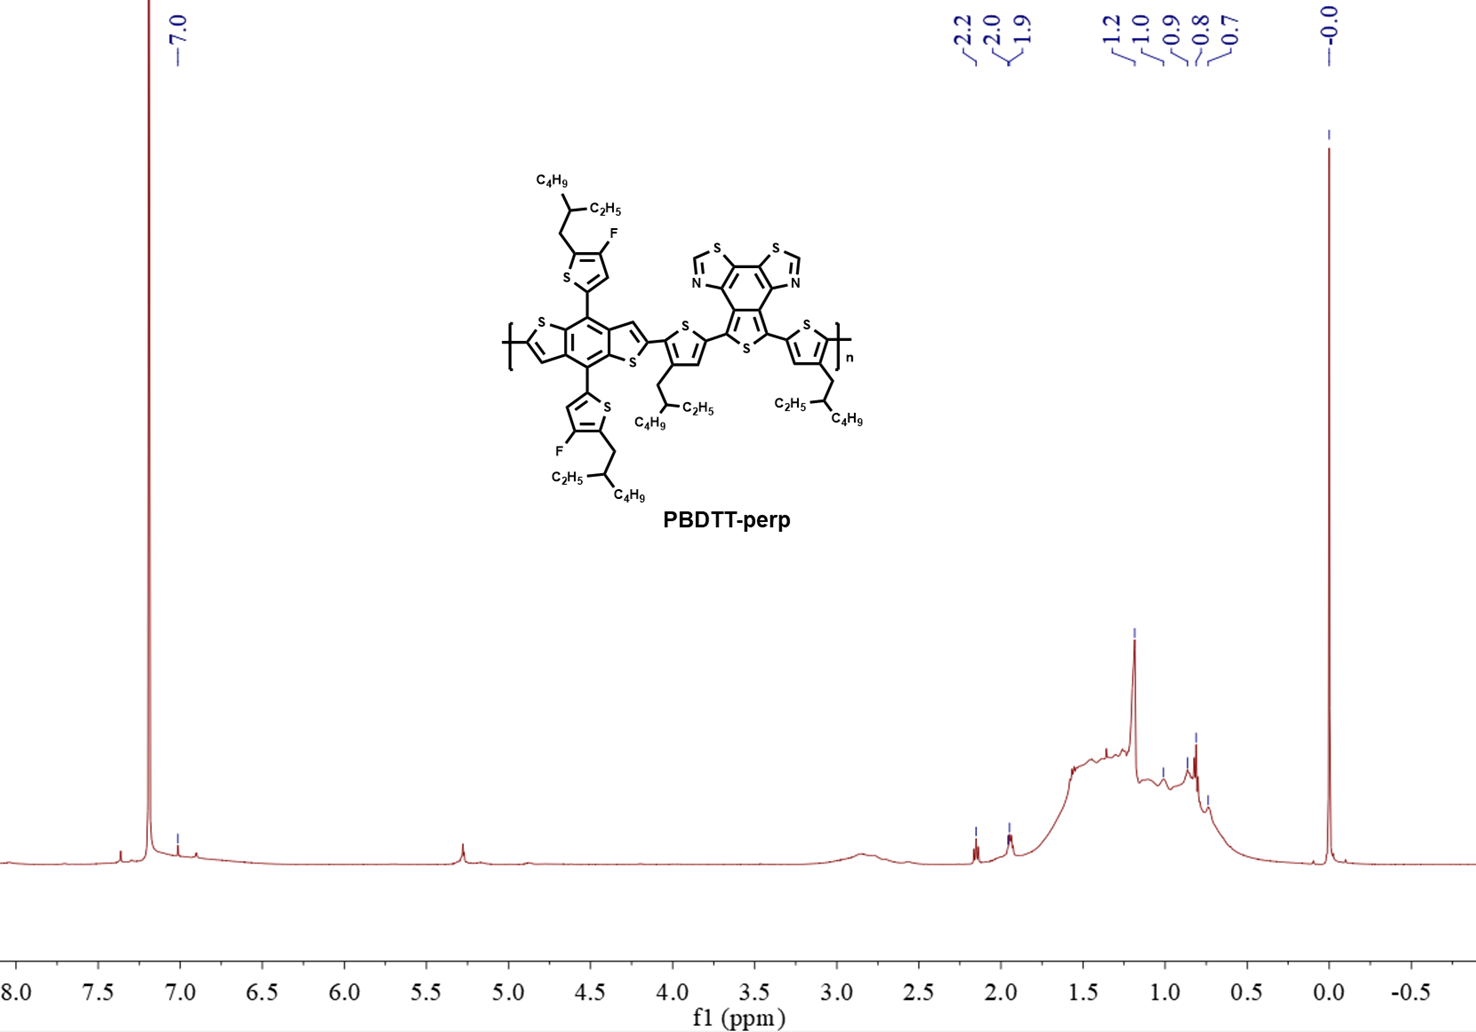
**

**Fig. S10** 1H NMR spectrum of **PBDTT-perp**.

**
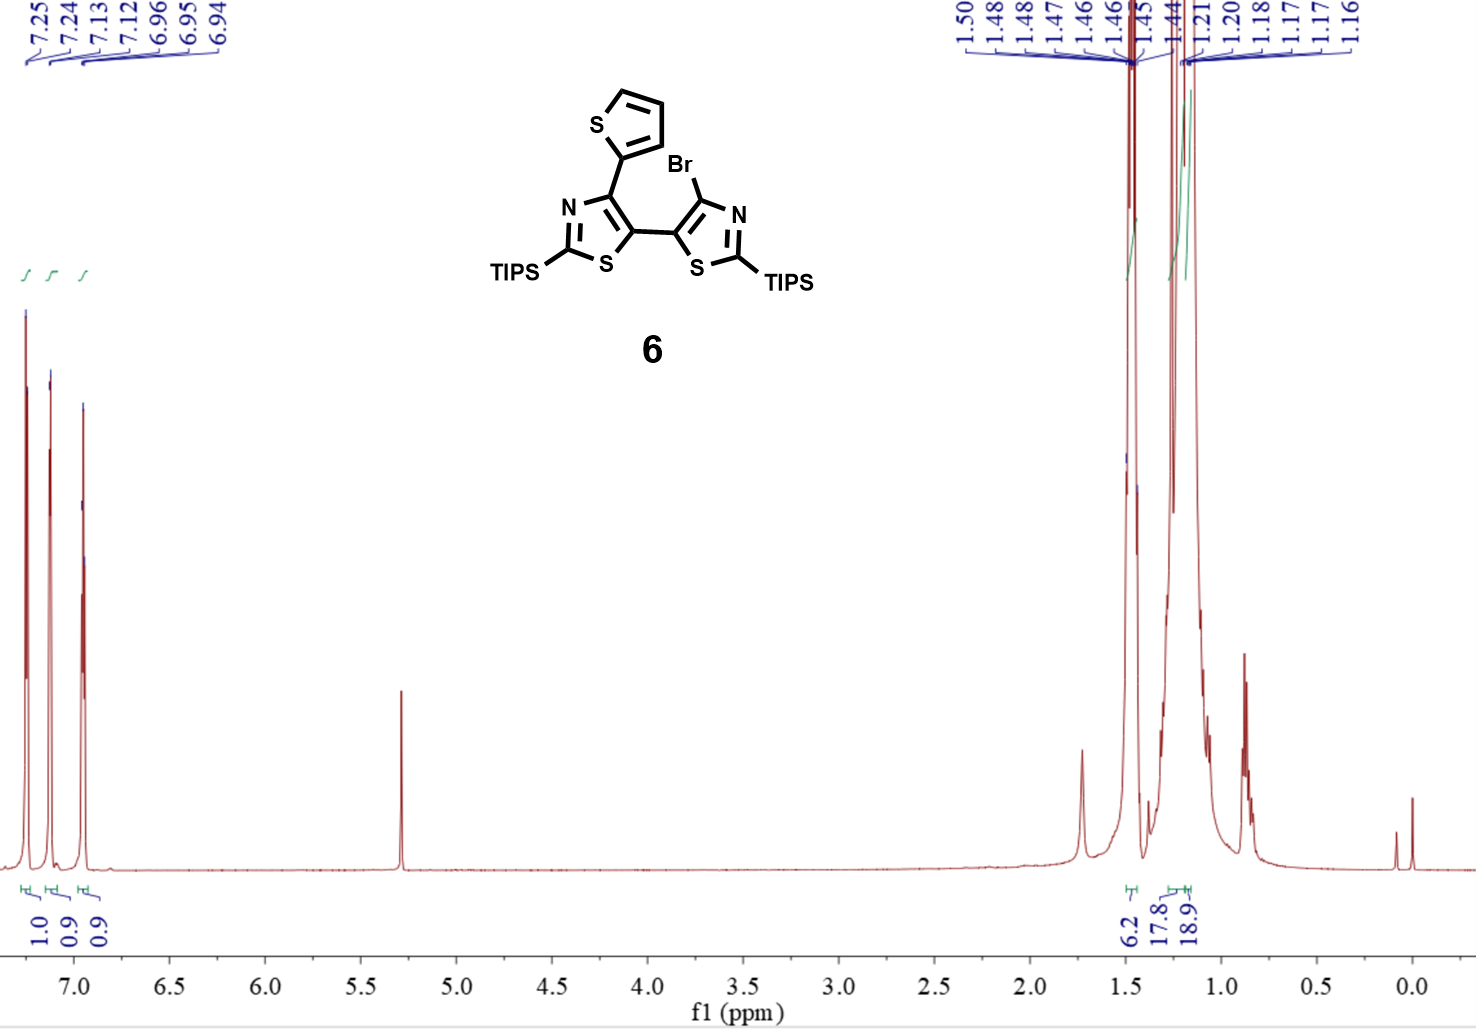
**

**Fig. S11** 1H NMR spectrum of **compound 6**.

**
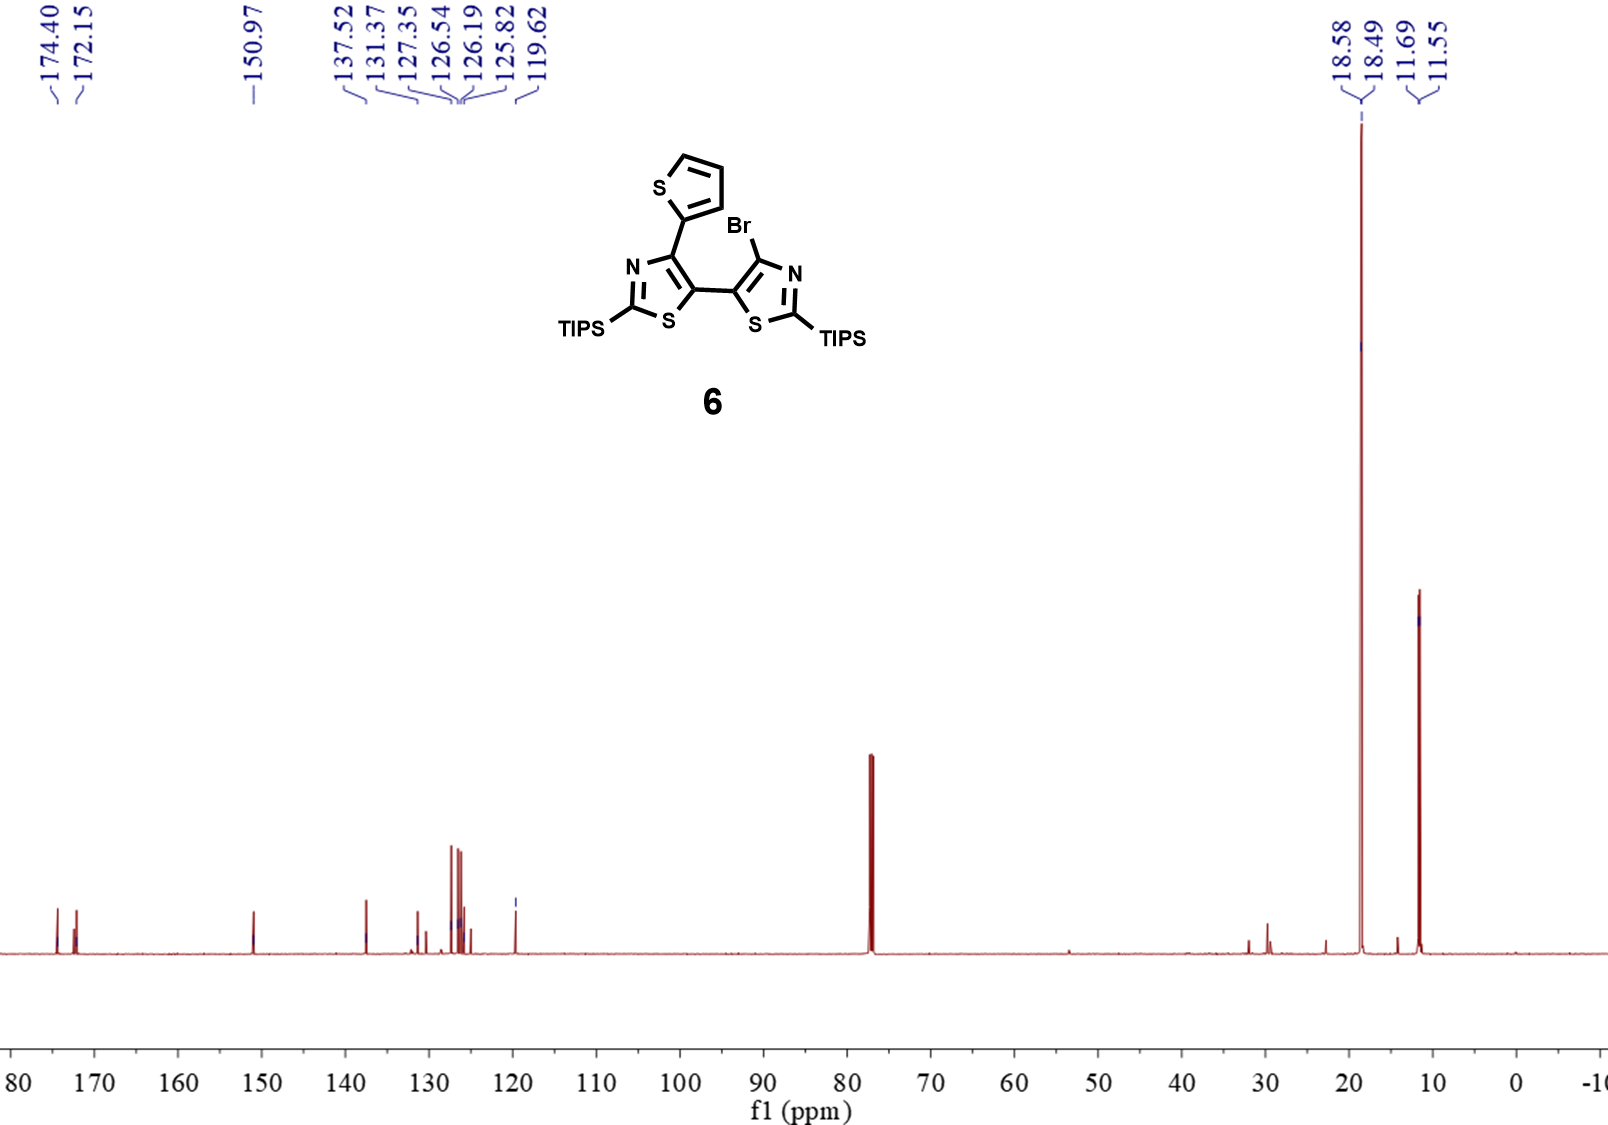
**

**Fig. S12** 13C NMR spectrum of **compound 6**.


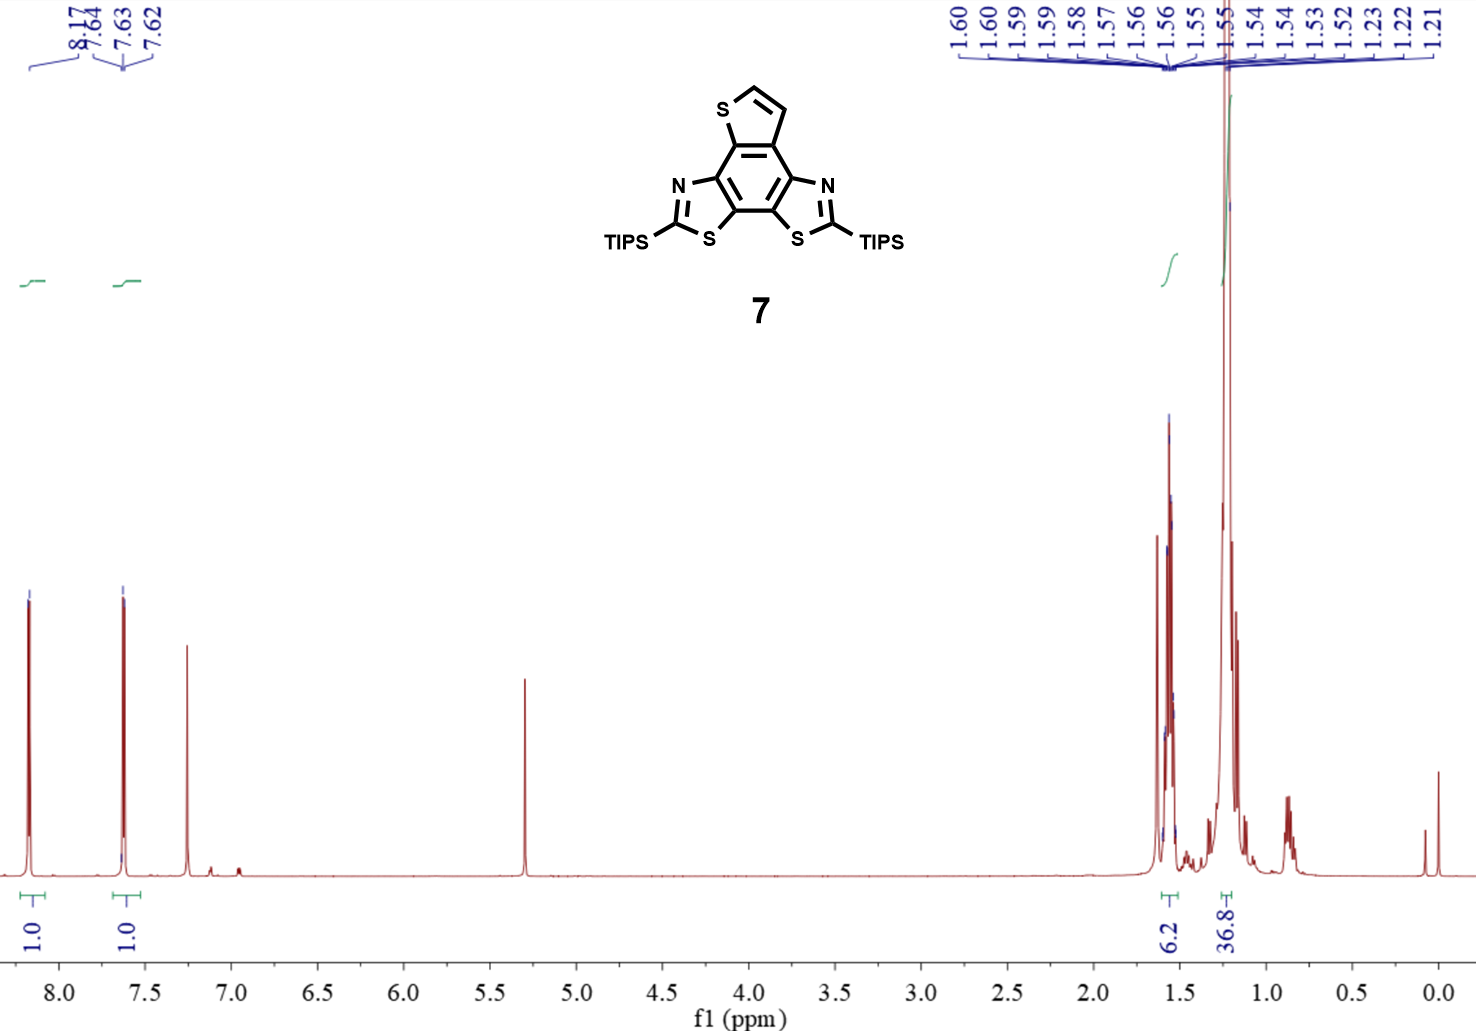


**Fig. S13** 1H NMR spectrum of **compound 7**.

**
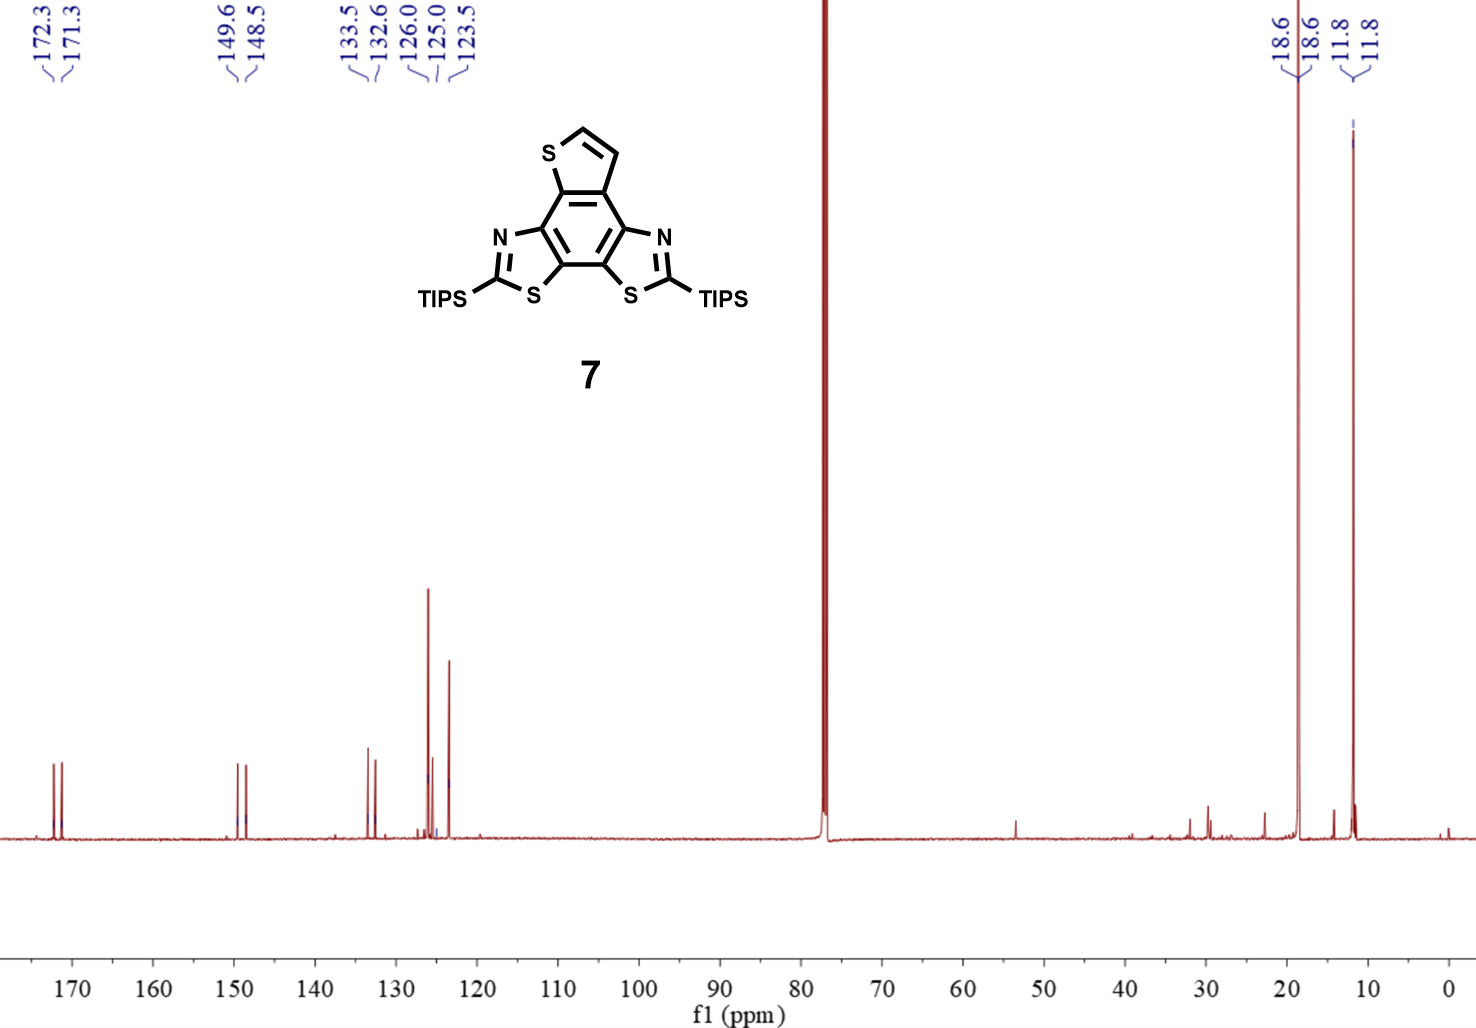
**

**Fig. S14** 13C NMR spectrum of **compound 7**.


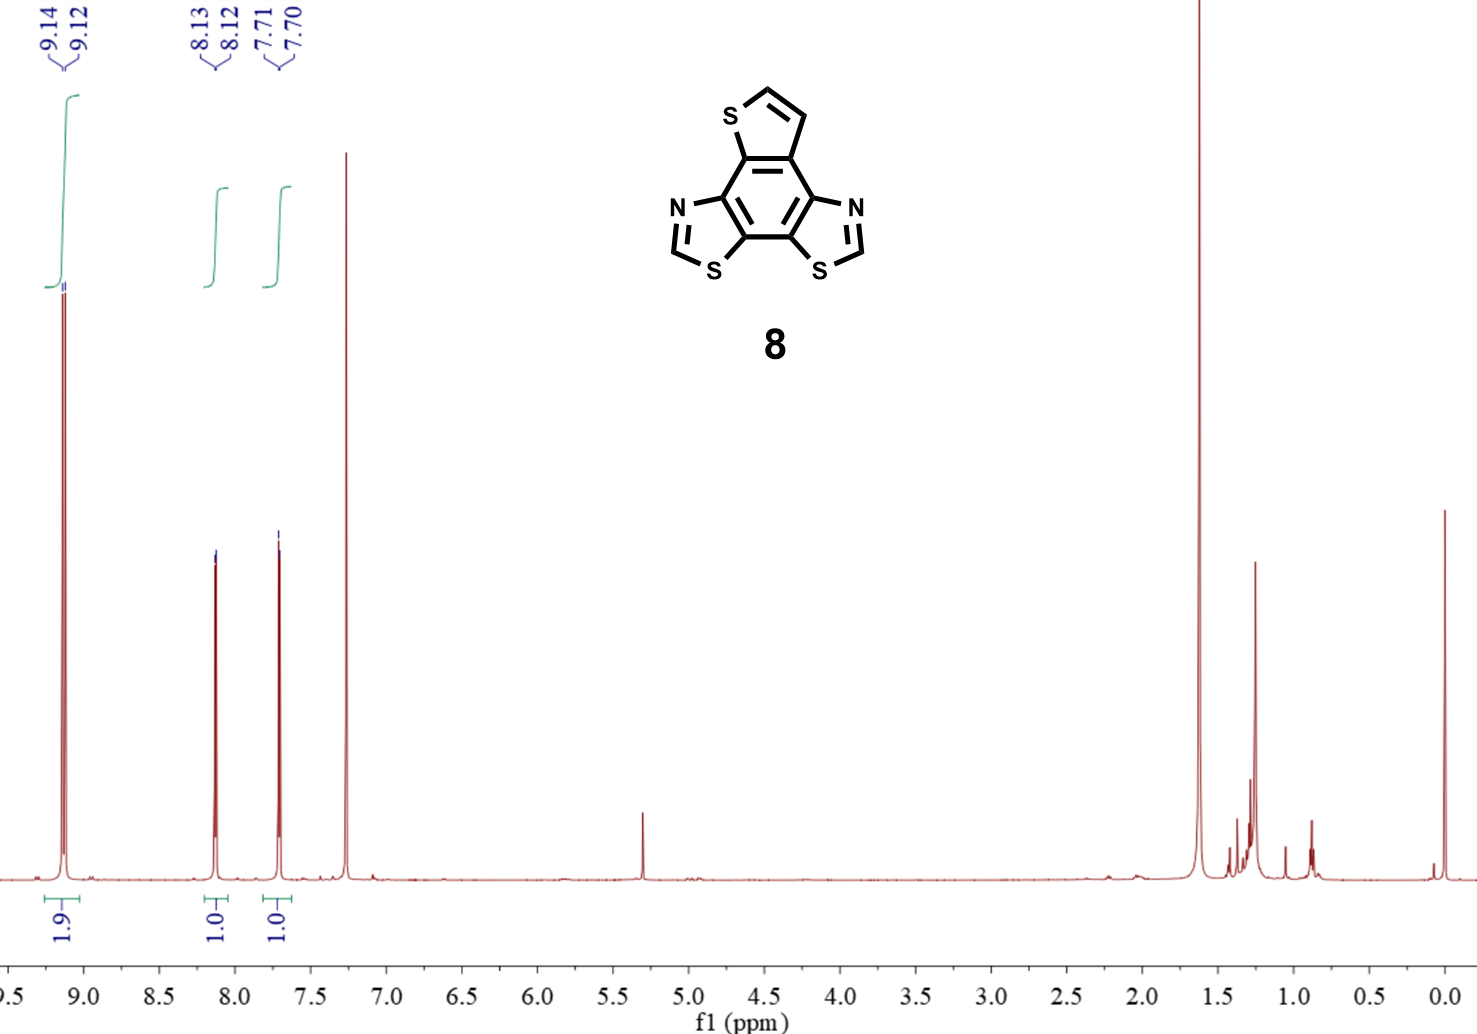


**Fig. S15** 1H NMR spectrum of **compound 8**.

**
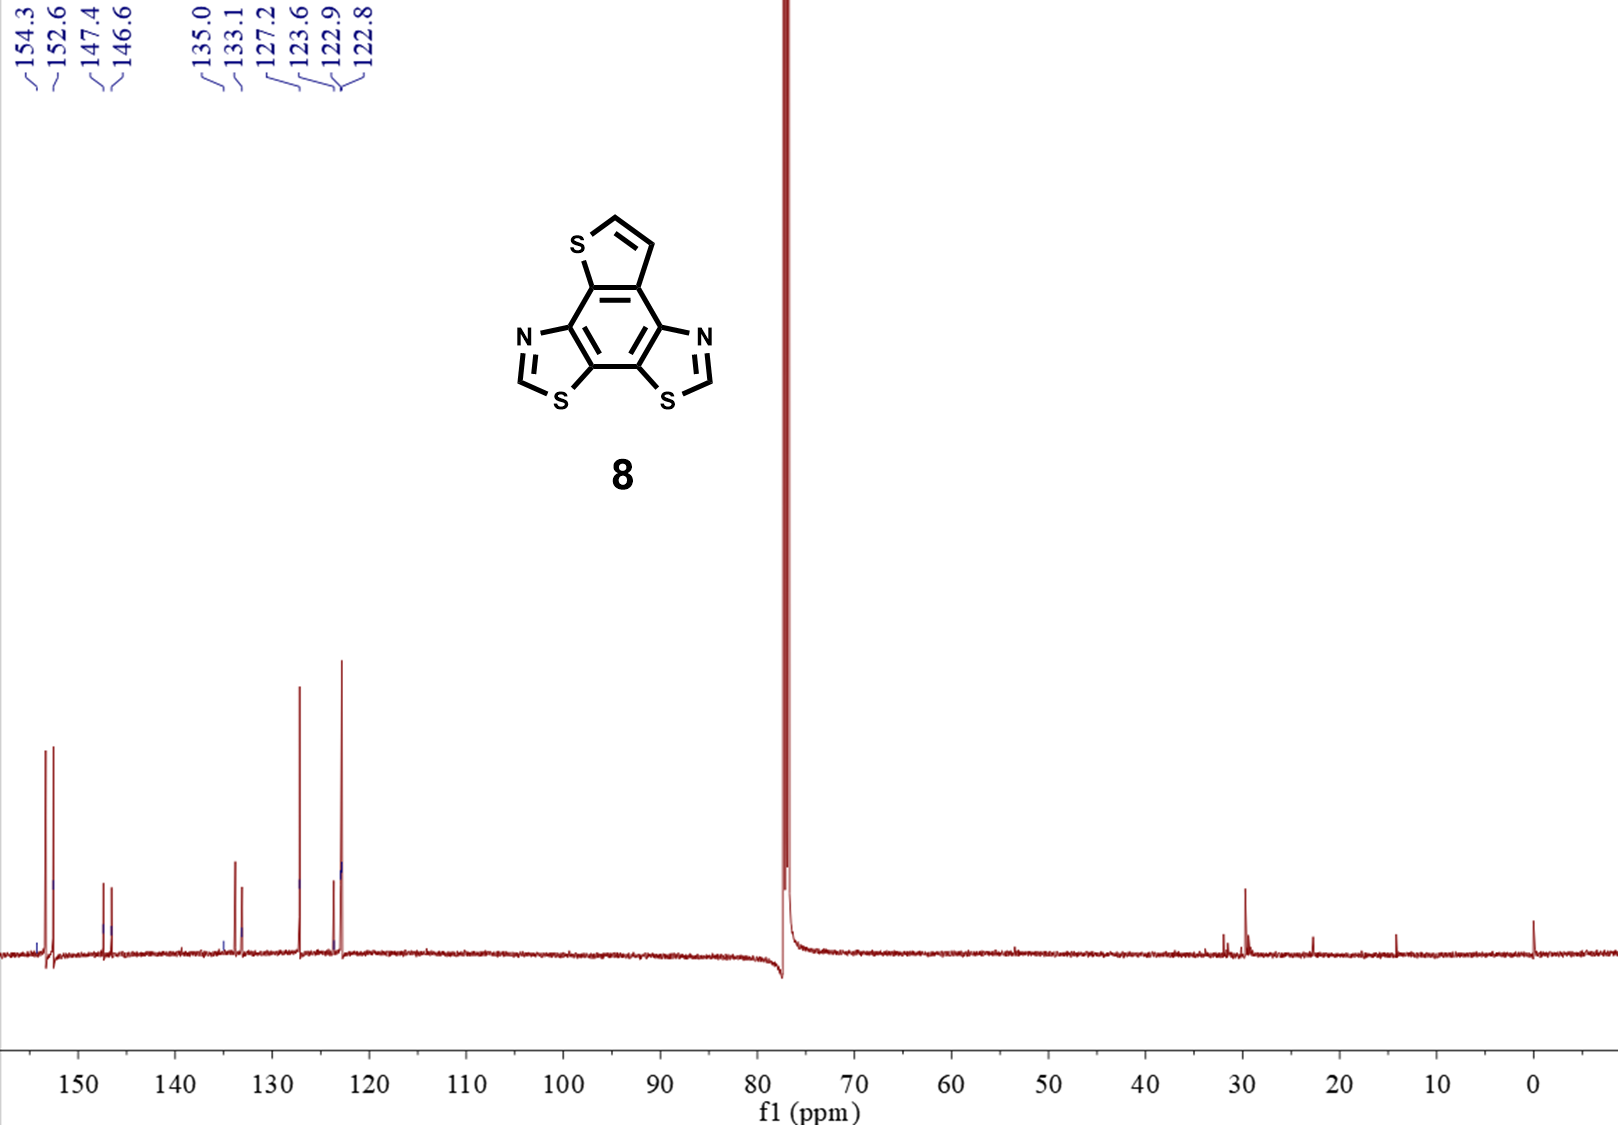
**

**Fig. S16** 13C NMR spectrum of **compound 8**.

**
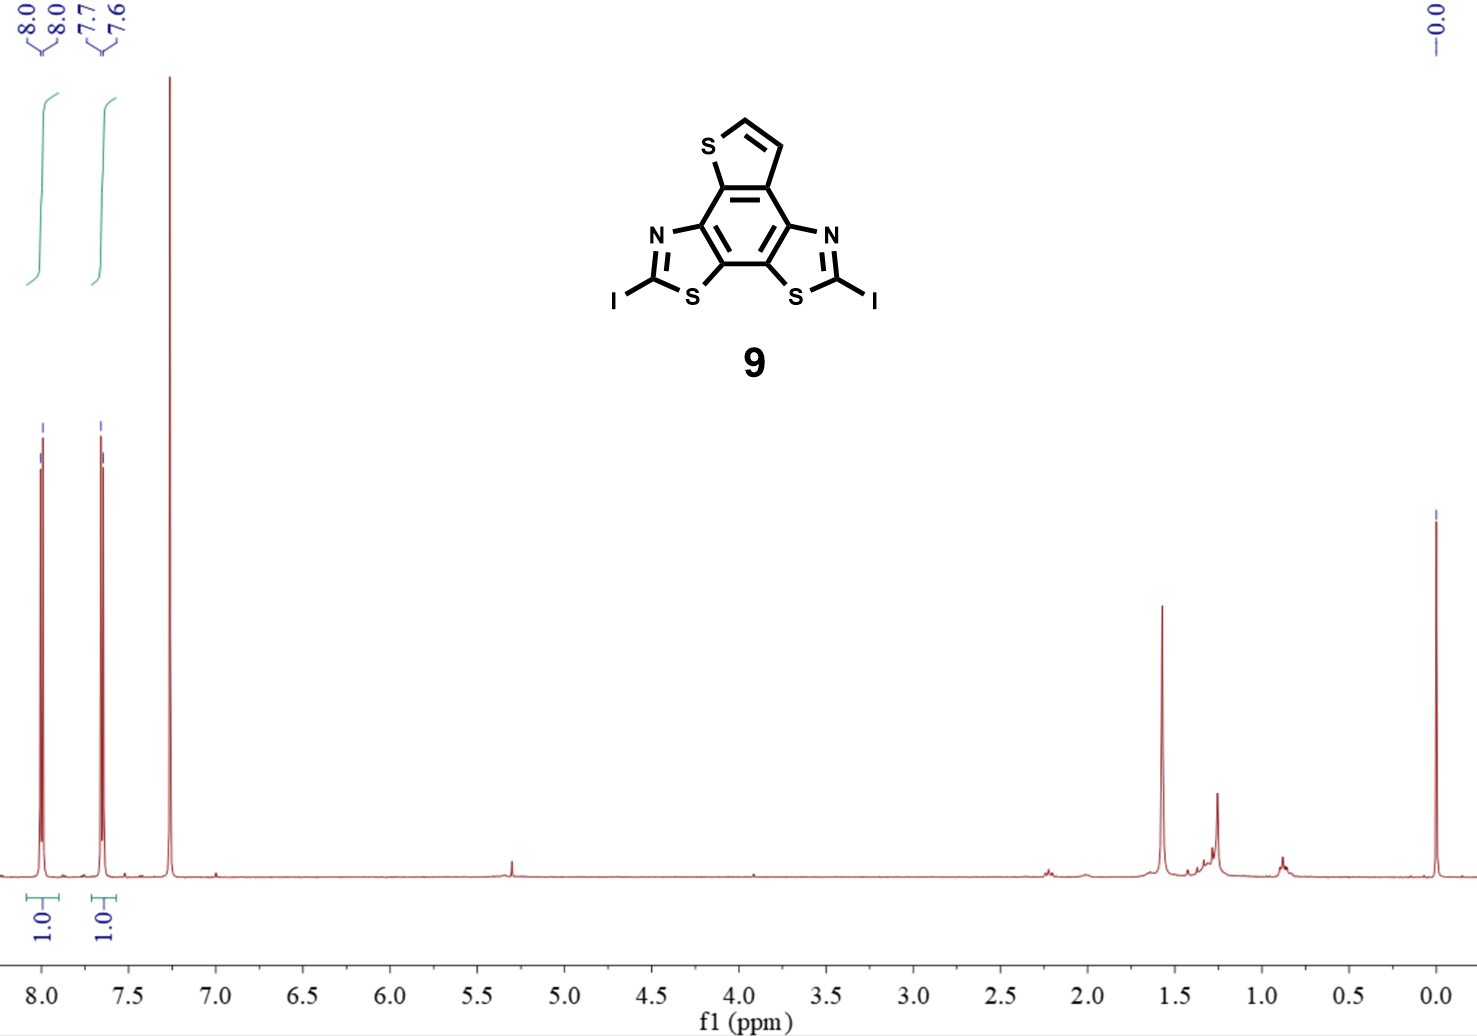
**

**Fig. S17** 1H NMR spectrum of **compound 9**.

**
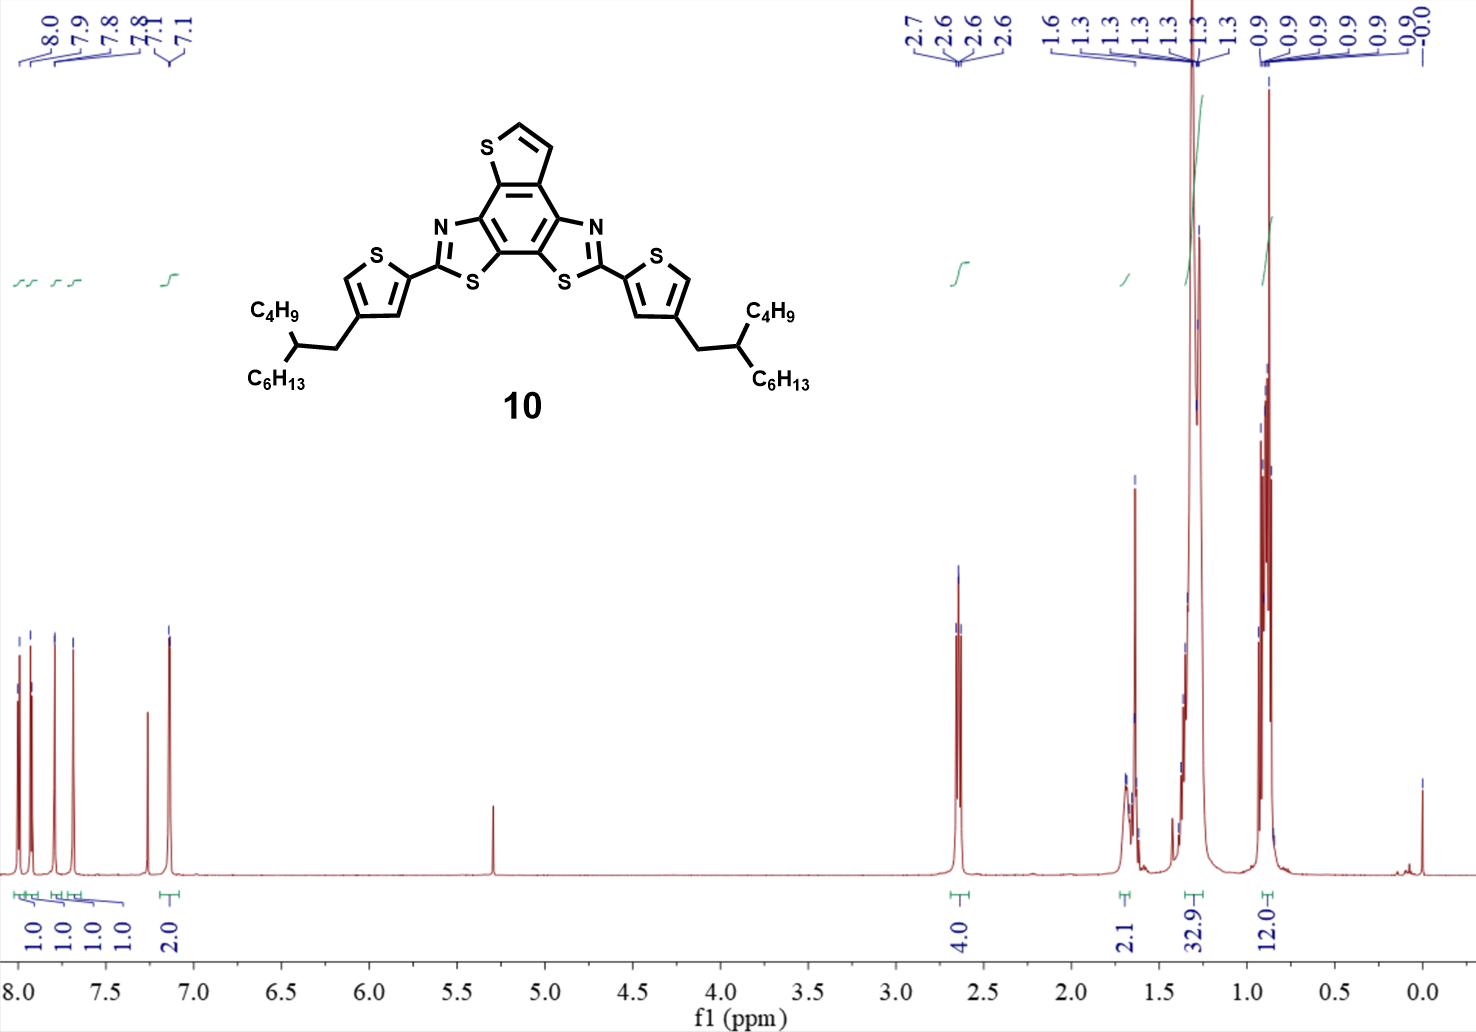
**

**Fig. S18** 1H NMR spectrum of **compound 10**.

**
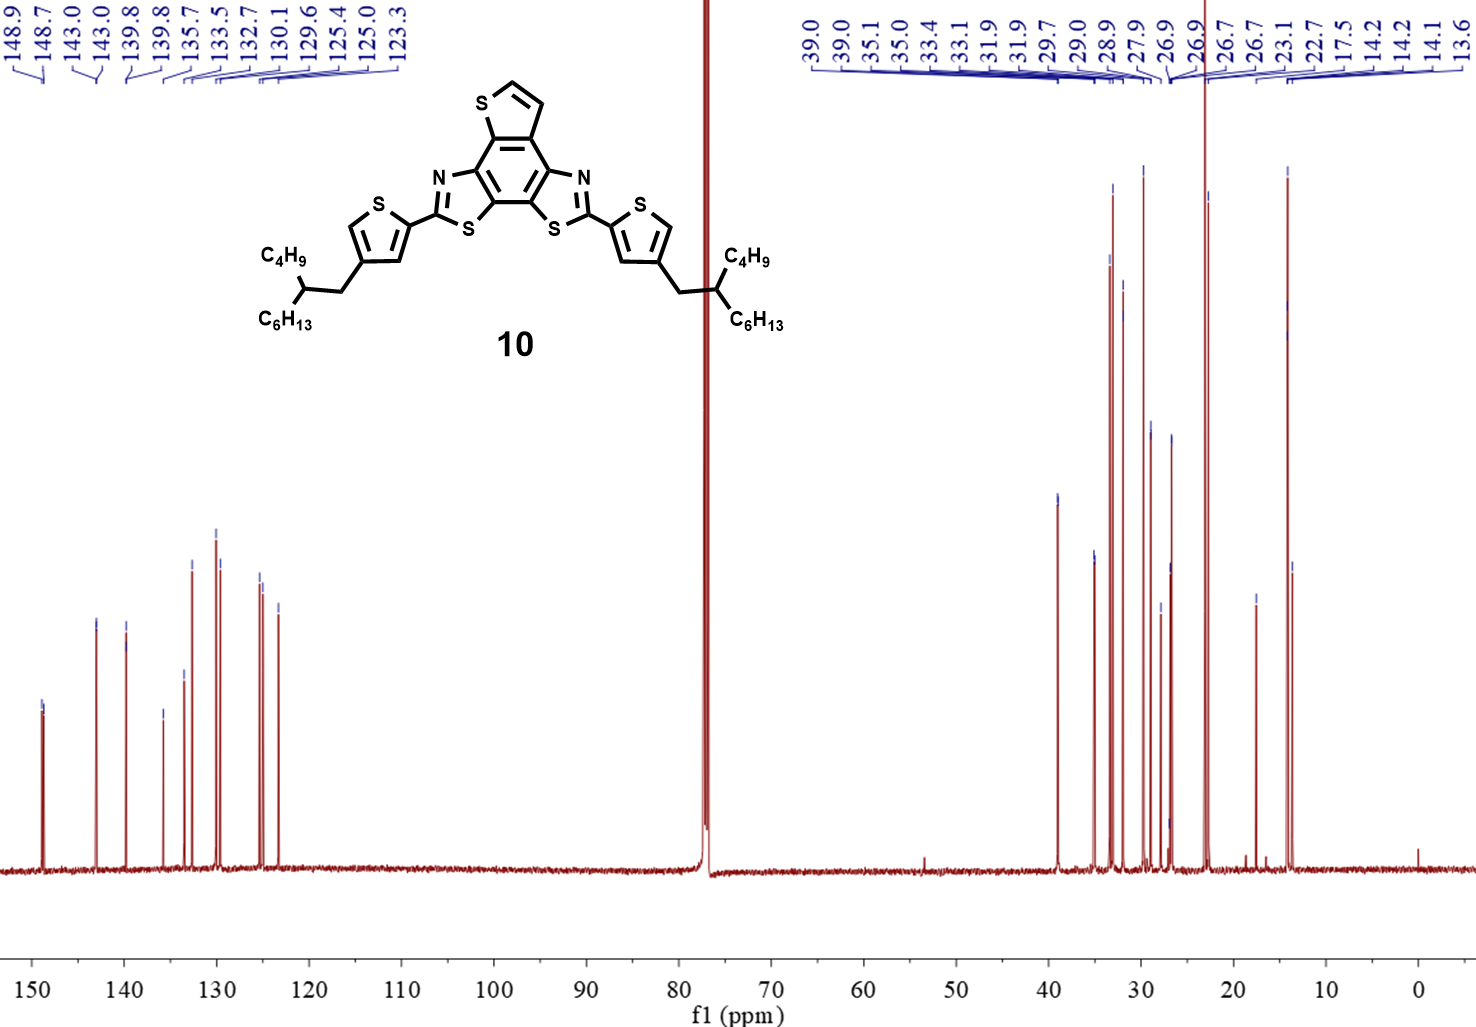
**

**Fig. S19** 13C NMR spectrum of **compound 10**.


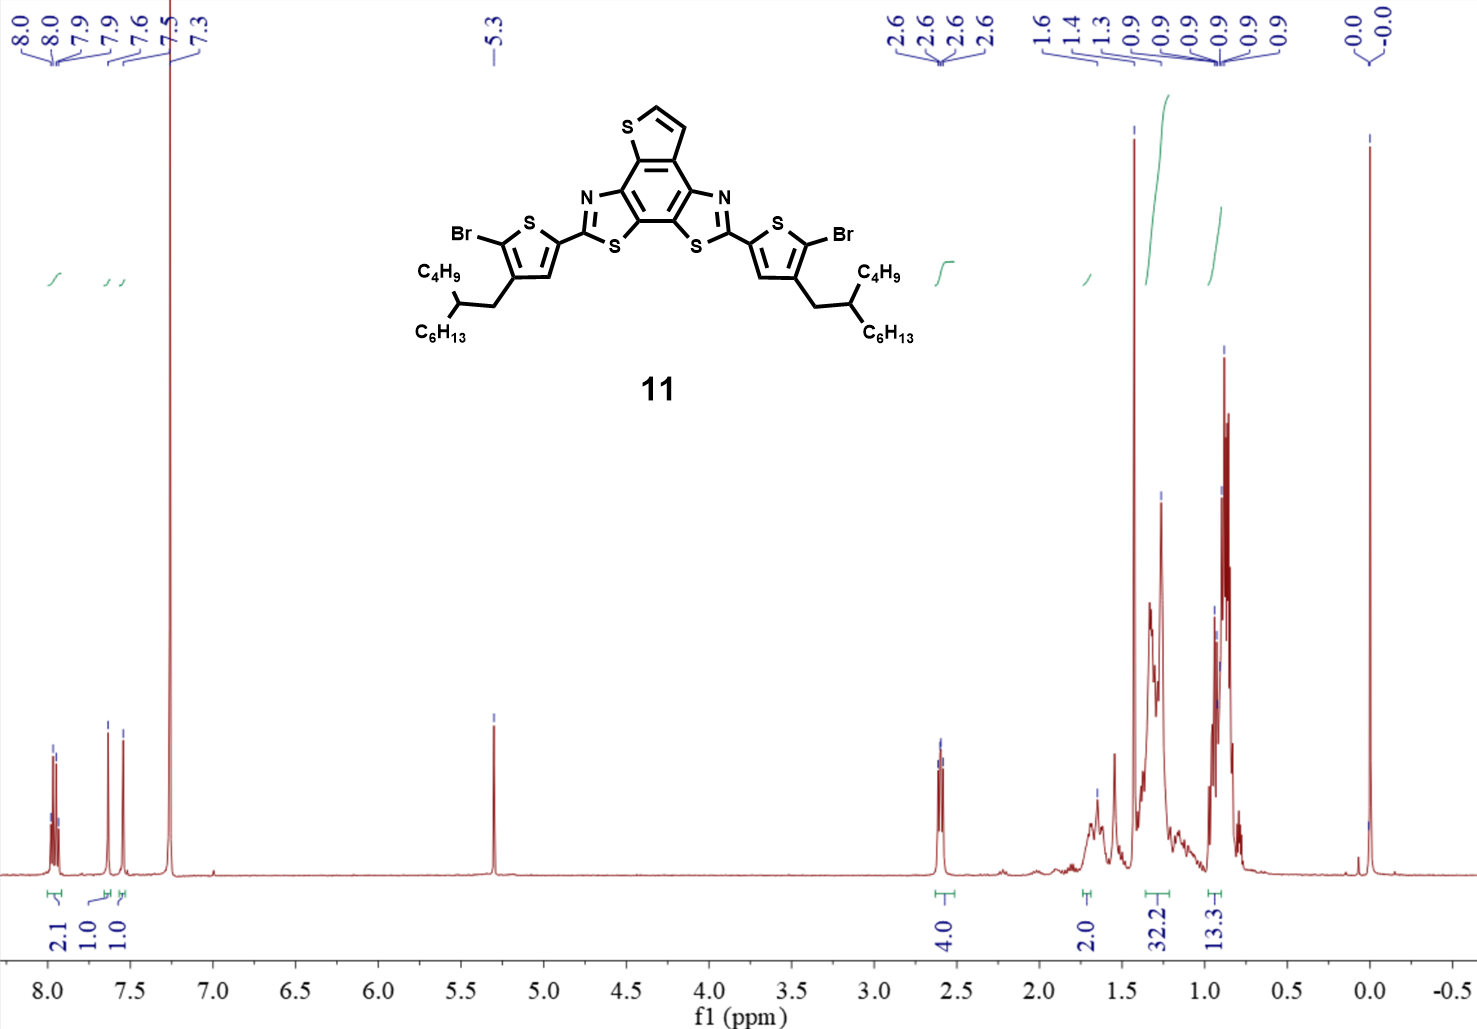


**Fig. S20** 1H NMR spectrum of **compound 11**.

**
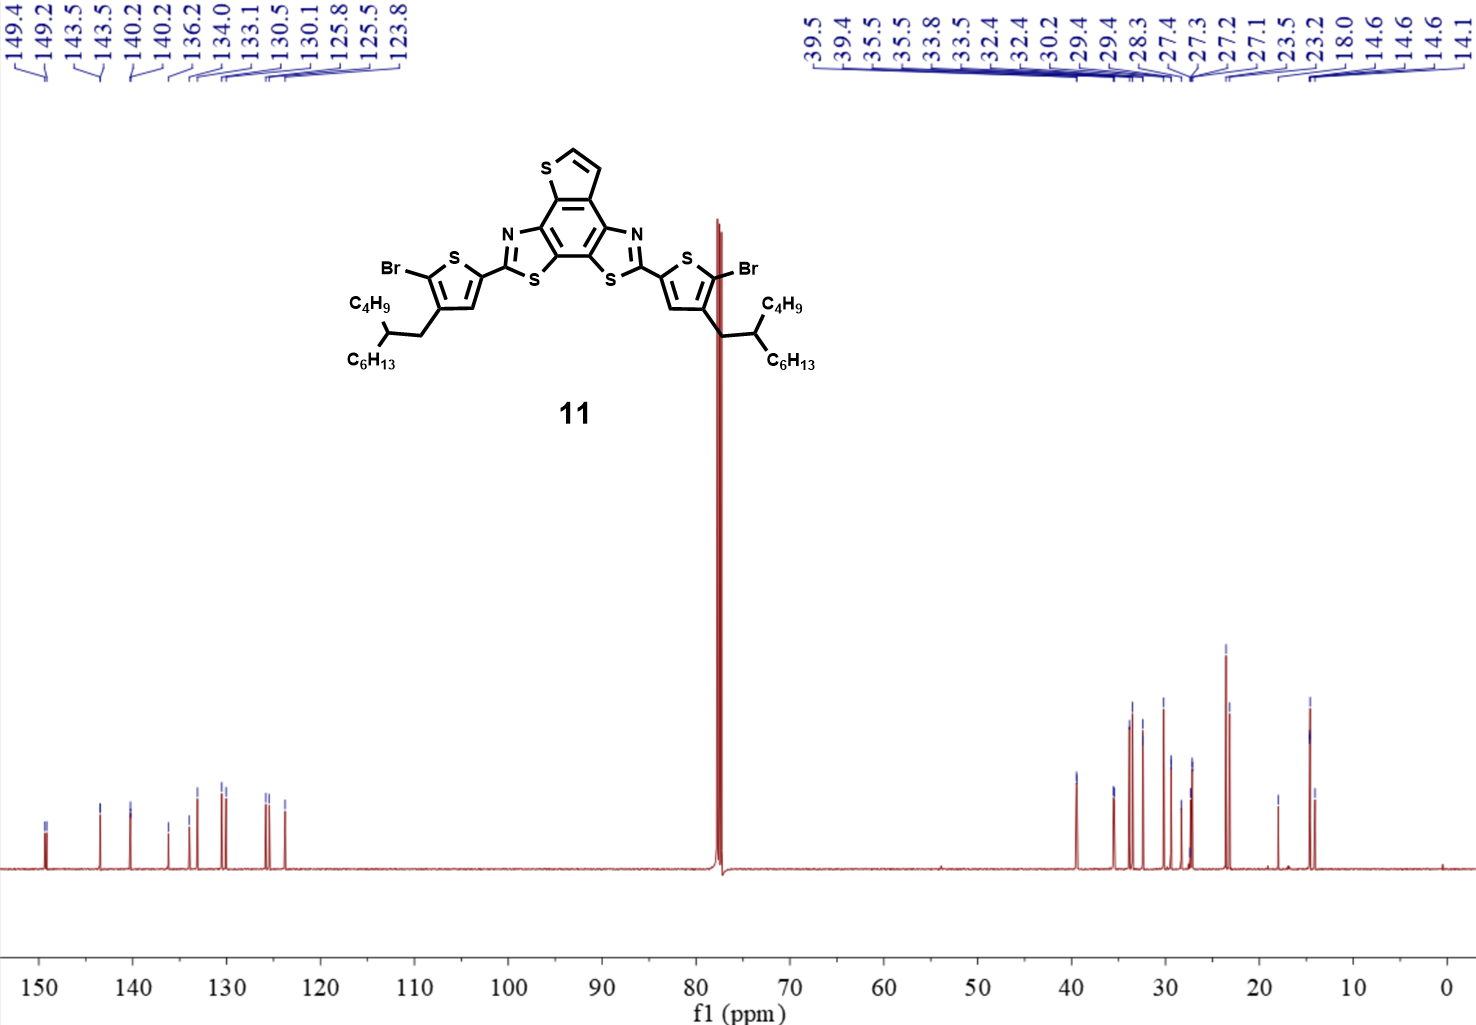
**

**Fig. S21** 13C NMR spectrum of **compound 11**.

**
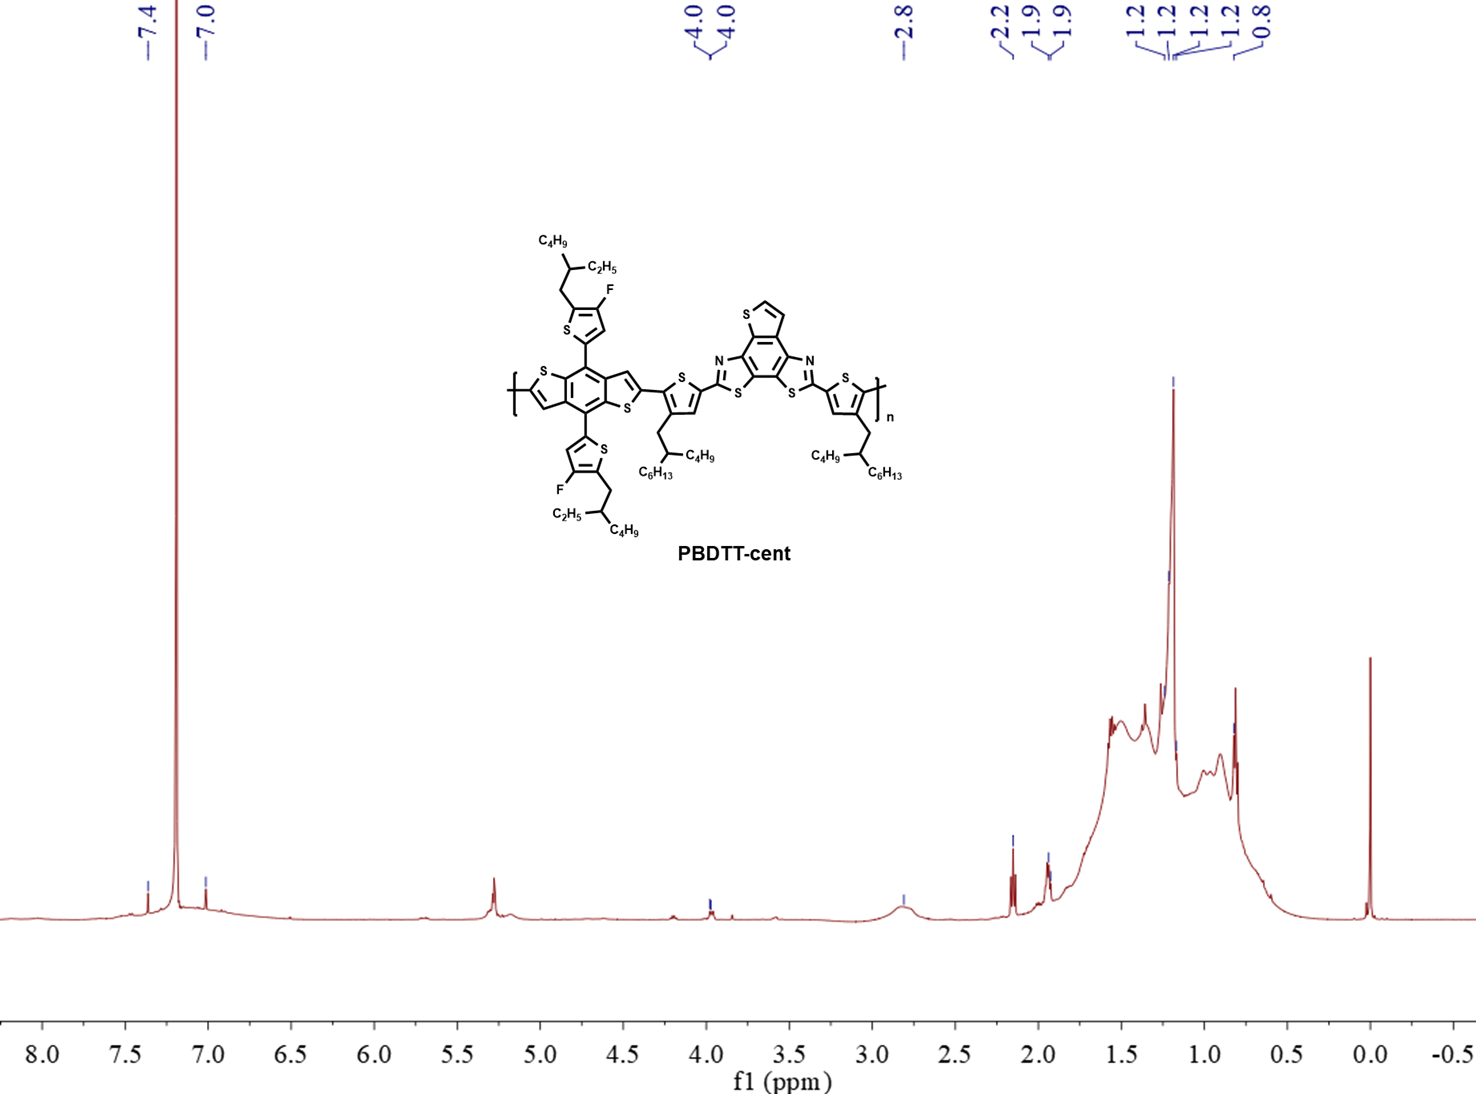
**

**Fig. S22** 1H NMR spectrum of **PBDTT-cent**.

**4. Molecular geometry and ESP analysis**


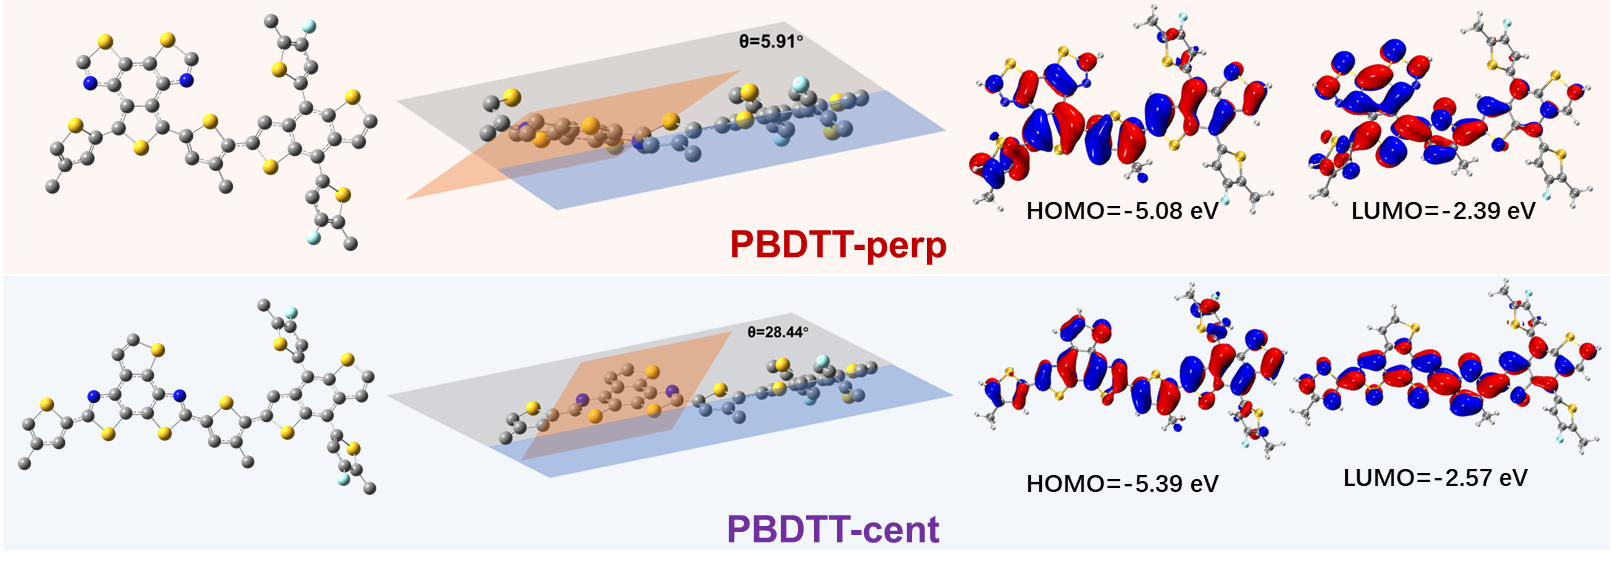


**Fig. S23** DFT-optimized molecular geometries and frontier molecular orbital distributions (HOMO/LUMO) with corresponding energy levels for PBDTT-perp and PBDTT-cent.


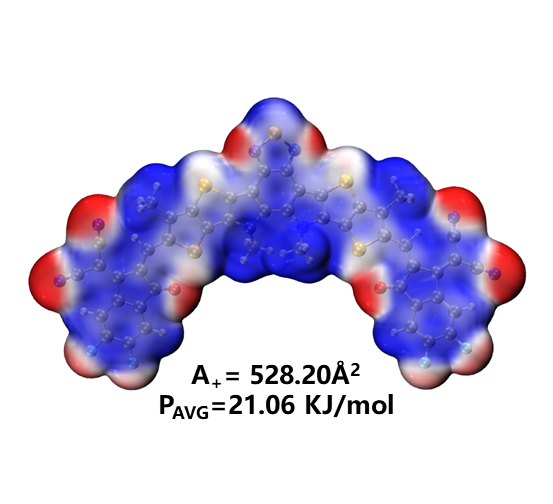


**Fig. S24** ESP distributions for L8BO.

**Table S1** ESP analysis and MPI for PBDTT-perp and PBDTT-cent.


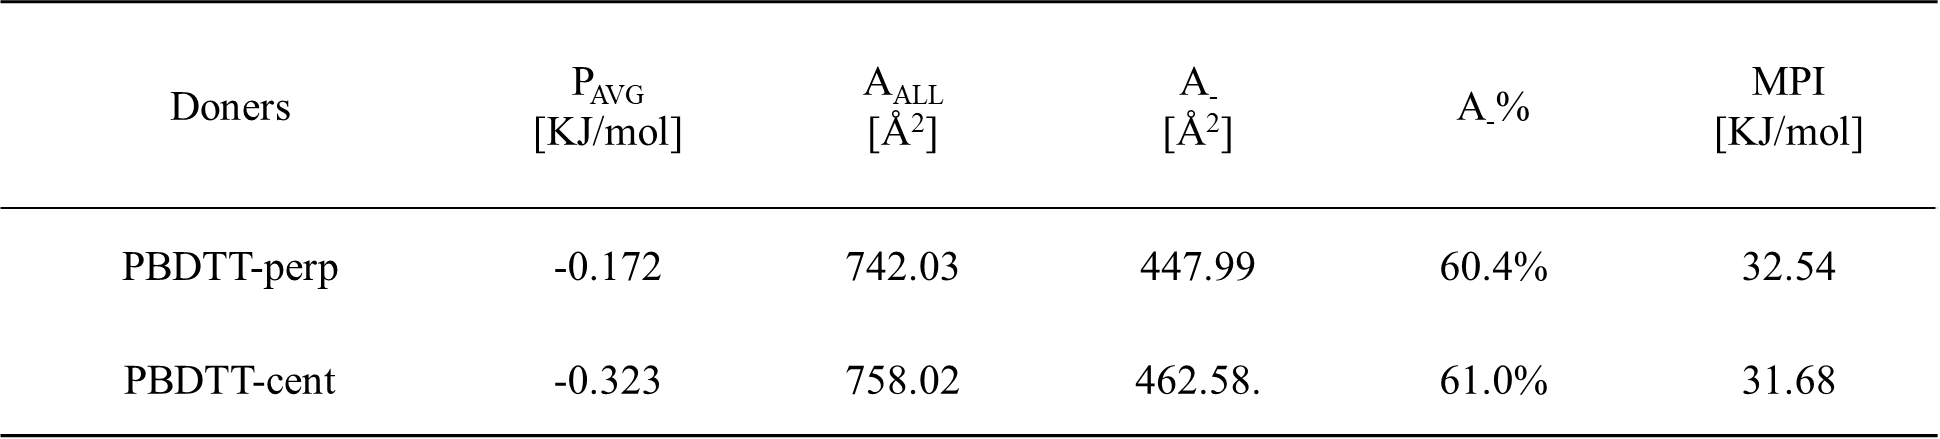


**Table S2** Overall average ESP value of each part for PBDTT-perp and PBDTT-cent.

**
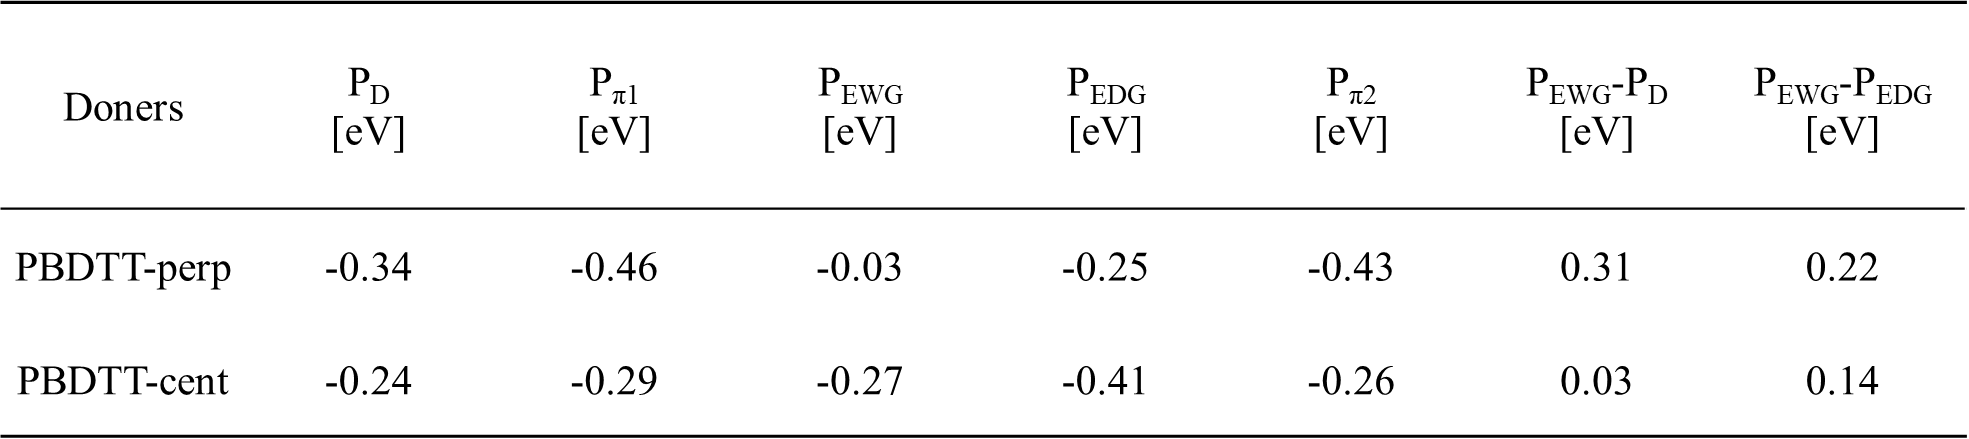
**

**5. Cyclic Voltammetry**


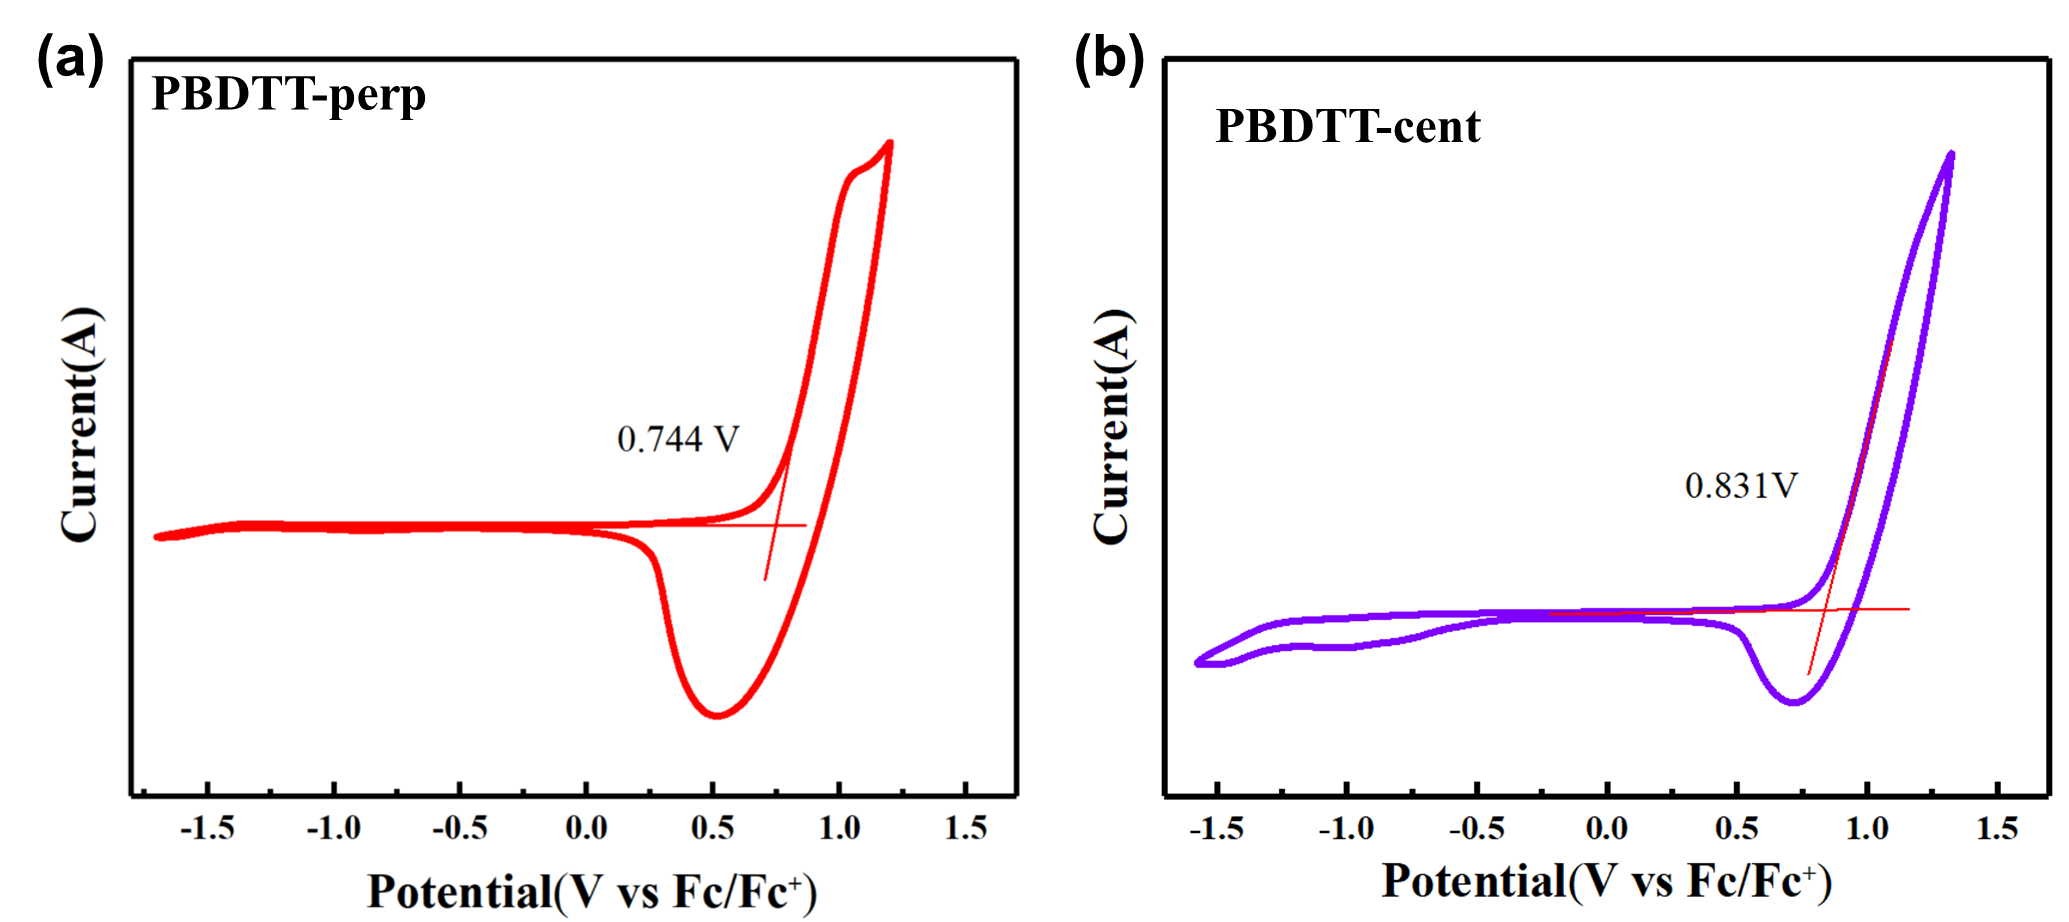


**Fig. S25** Cyclic voltammograms for PBDTT-perp and PBDTT-cent.

**6. Gel Permeation Chromatography**

**
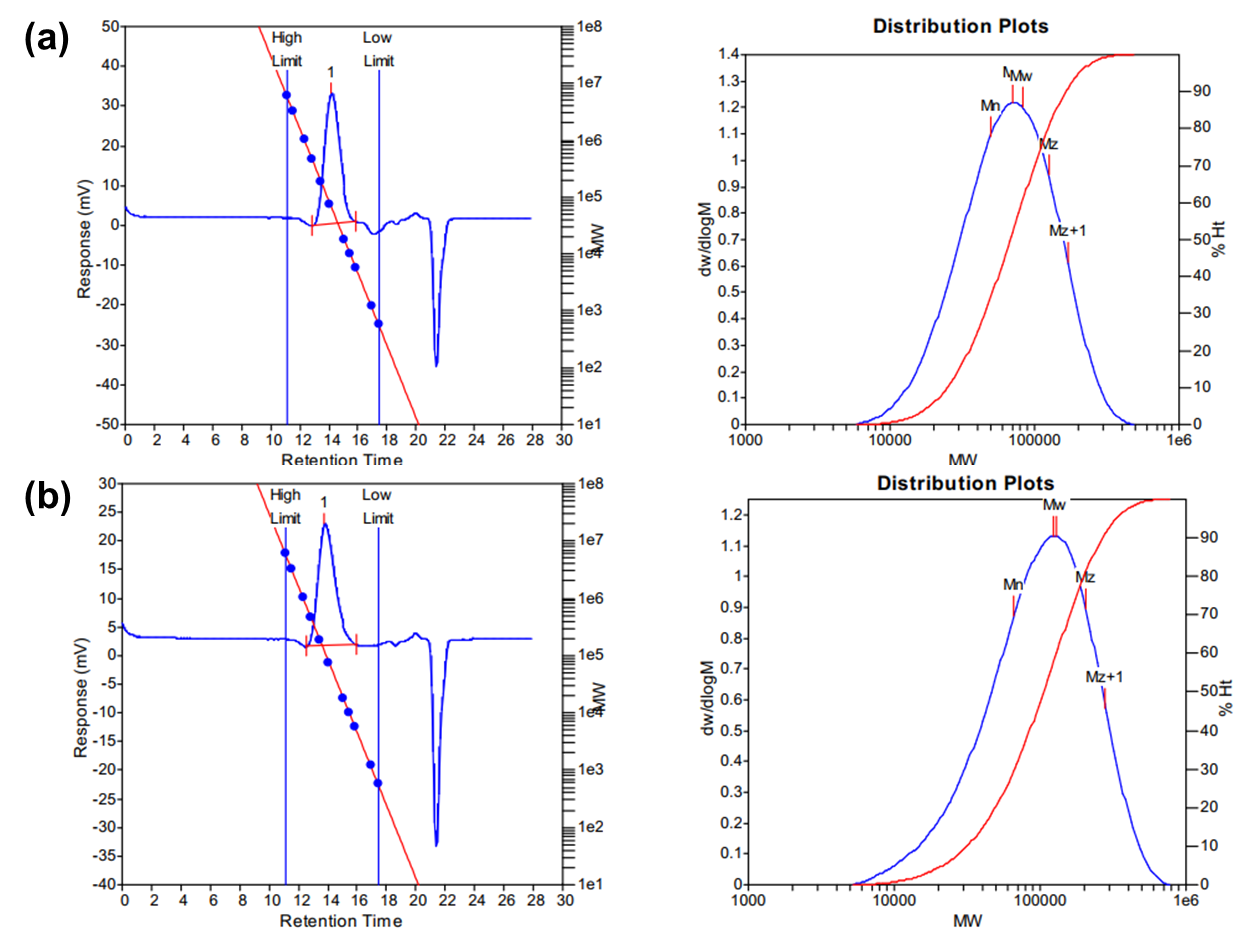
**

**Fig. S26** Retention time and molecular weight distribution plots for PBDTT-perp and PBDTT-cent.

**7. Thermogravimetric Analysis**


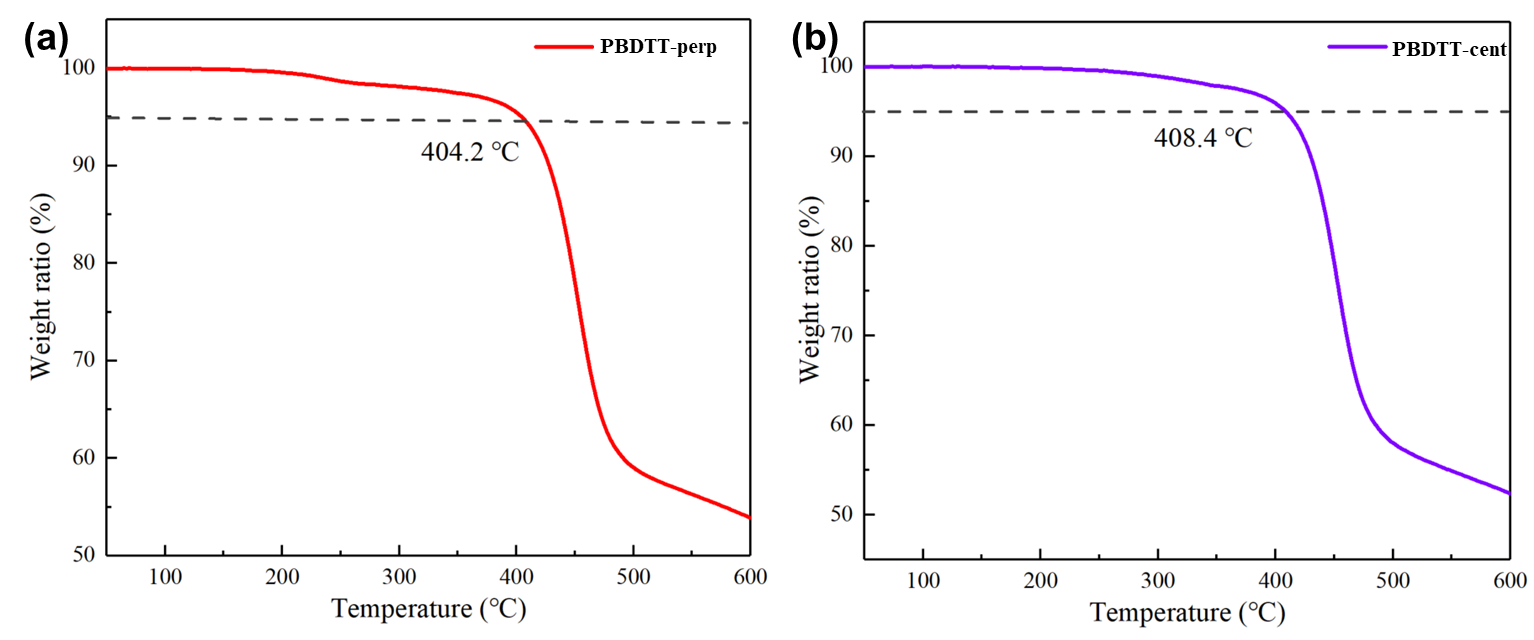


**Fig. S27** TG curves of PBDTT-perp and PBDTT-cent.

**8. Charge transmission and distribution**


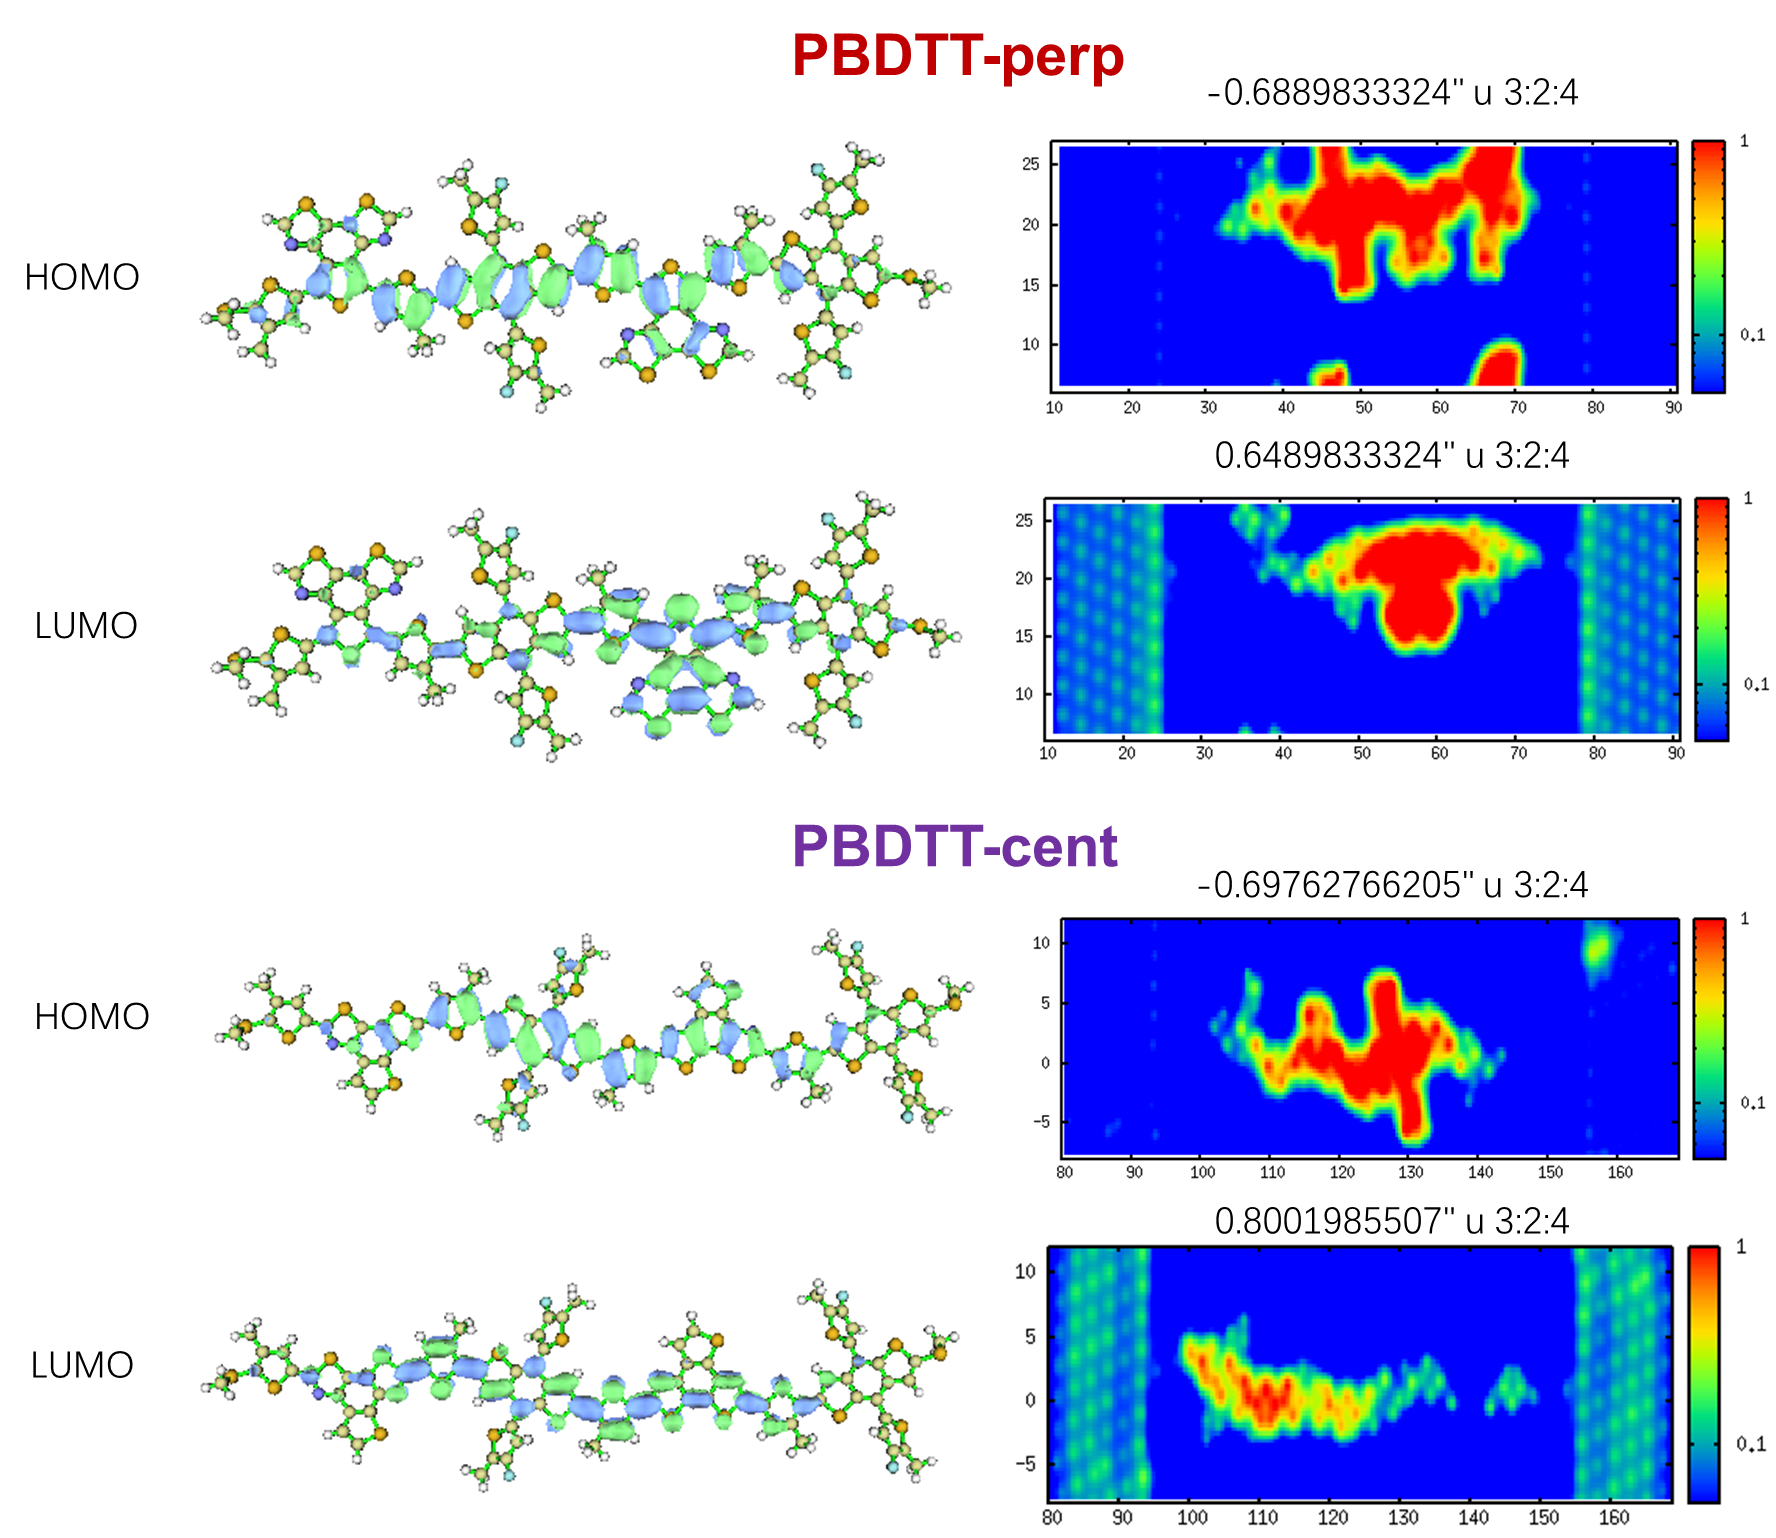


**Fig. S28** Local projected density of states (LDOS) of HOMO/LUMO orbitals in the xz-plane.

**
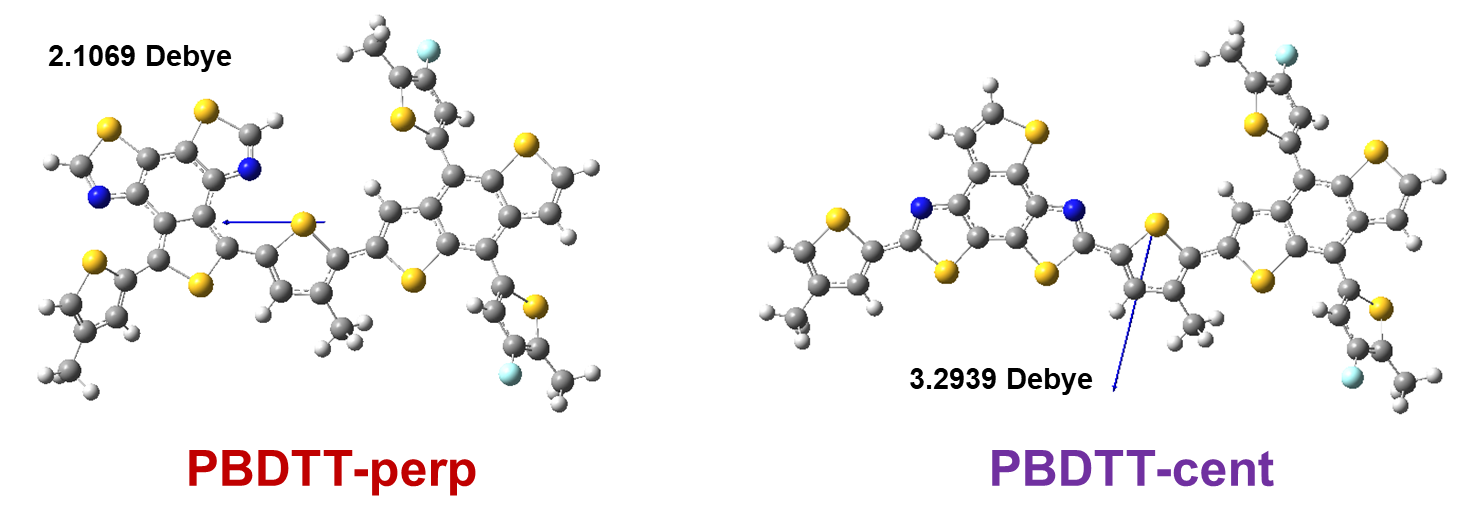
**

**Fig. S29** Optimized molecular geometry and dipole moment vector illustration for PBDTT-perp and PBDTT-cent.


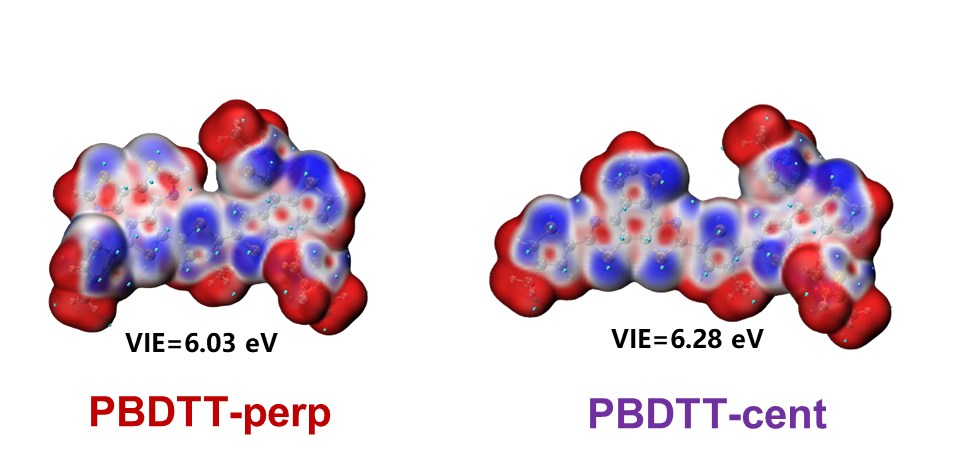


**Fig. S30** ALIE distributions for PBDTT-perp and PBDTT-cent at the B3LYP/6-31G(d, p) set.

**
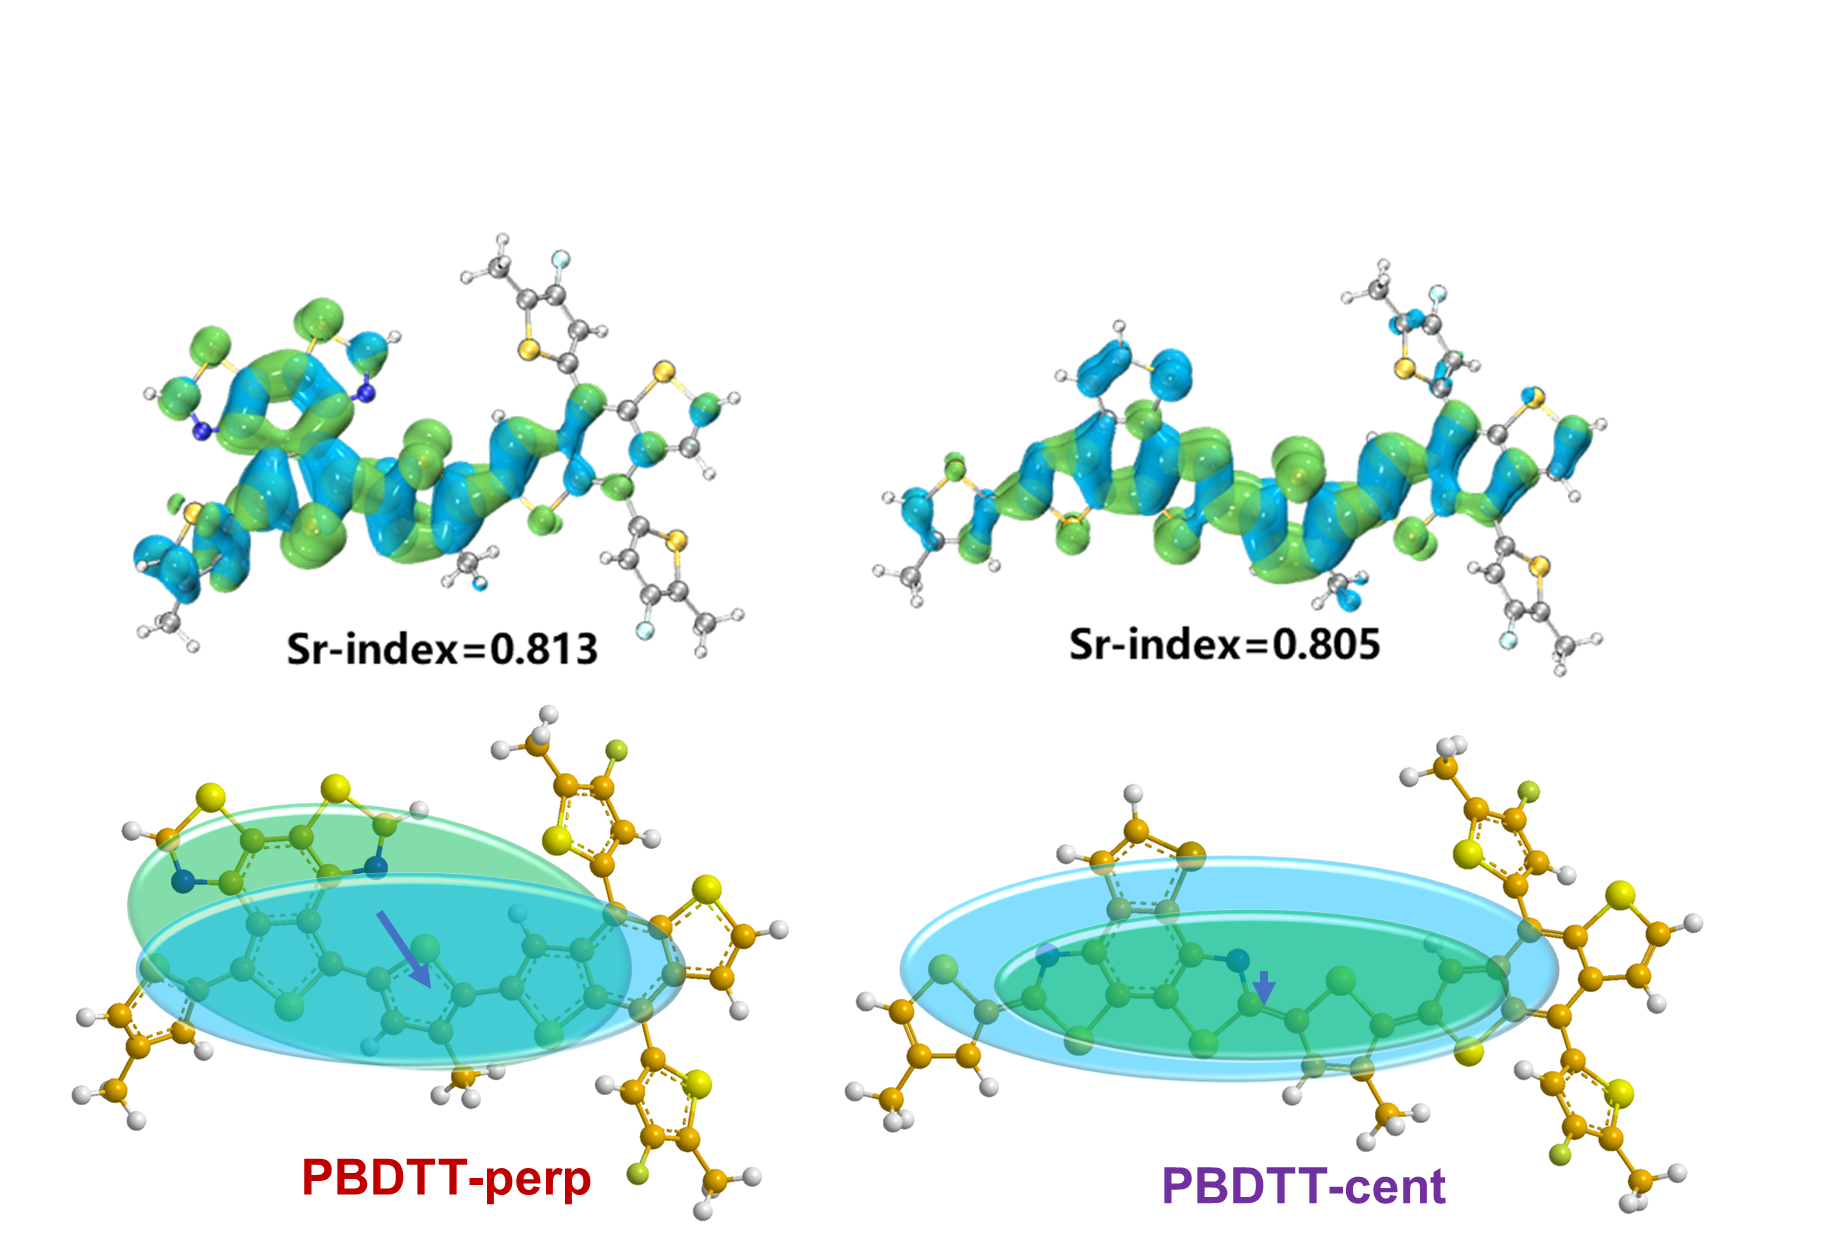
**

**Fig. S31** Hole–electron distribution and their equivalent description for PBDTT-perp and PBDTT-cent (blue for hole, and green for electron).

**Table S3** Energy level, Eg, oscillator strength and hole–electron distribution analysis for PBDTT-perp and PBDTT-cent by DFT calculations.


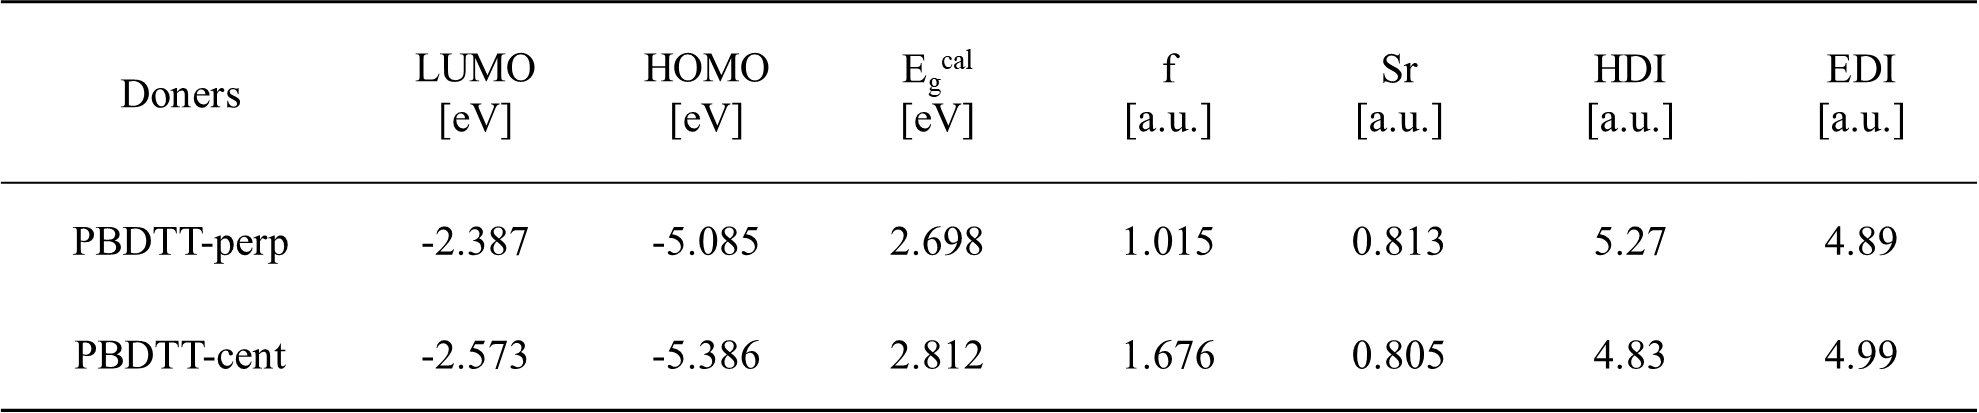


**9. Exciton binding energy, dielectric constant and exciton Bohr radius**

**
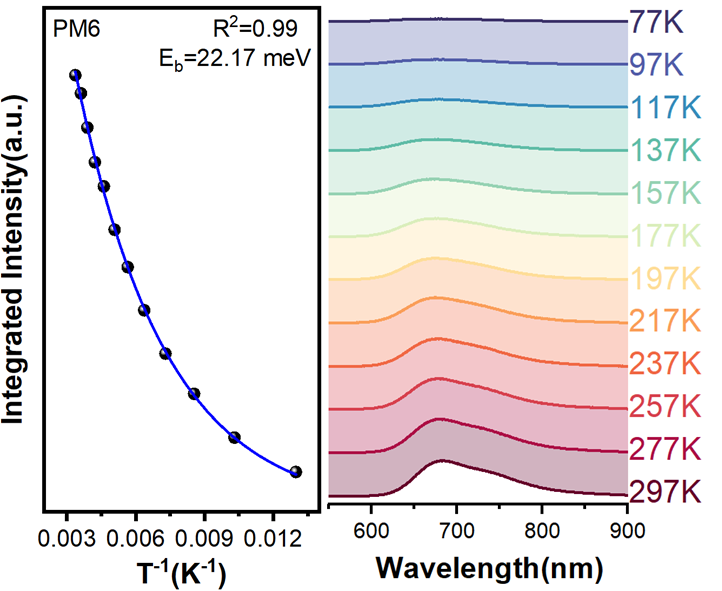
**

**Fig. S32** Time-dependent photoluminescence (TDPL) spectra of PM6 films under 470 nm excitation, with corresponding TDPL intensity evolution as a function of temperature.

**
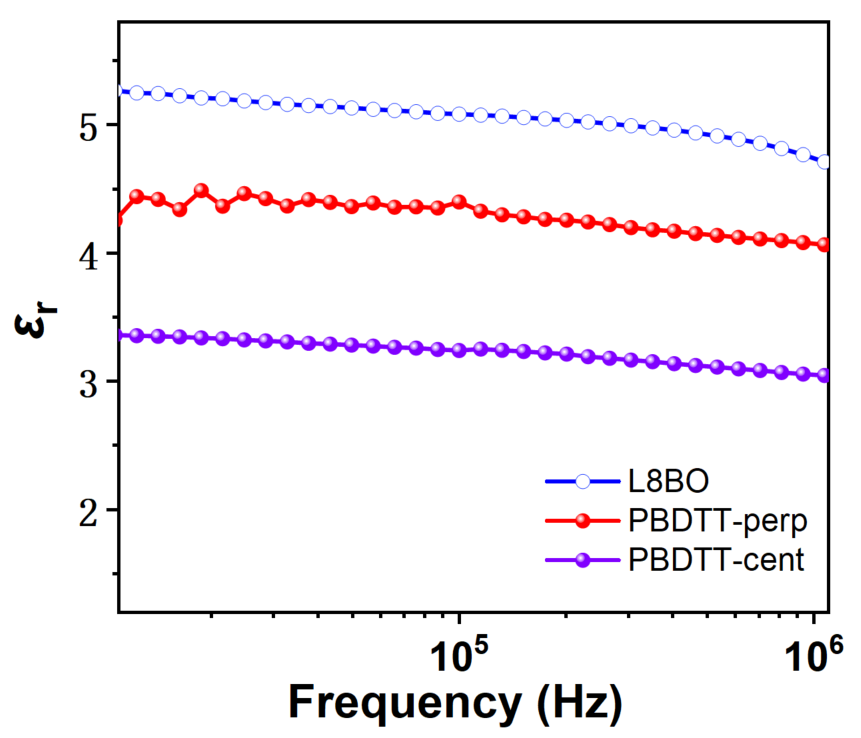
**

**Fig. S33** Dielectric constants of PBDTT-perp, PBDTT-cent, and L8BO.

**Table S4.** Summary of material properties: dielectric constant, exciton binding energy, and effective exciton radius.

| **Type** | **Materials**(a) | ***εᵣ*** | ***Eb*(meV)** | ***r*eff (nm)** |
| --- | --- | --- | --- | --- |
| **SMAs** | **IT-4F** | 3.98 | 75.60 | 0.60 |
| **BO-4Cl** | 5.35 | 21.66 | 1.52 |
| **PDs** | **P3HT** | 1.87 | 102.8 | 0.47 |
| **PM6** | 4.21 | 22.17 | 1.94 |
| **PBDTT-cent** | 3.18 | 39.79 | 1.12 |
| **PBDTT-perp** | 4.29 | 24.56 | 1.99 |

(a) *εᵣ* and *Eb* data for IT-4F, BO-4Cl, and P3HT were obtained from our previous work6; data for PM6, PBDTT-cent, and PBDTT-perp were measured in this study under the same experimental protocols and conditions.

**10. Femtosecond transient absorption**

**
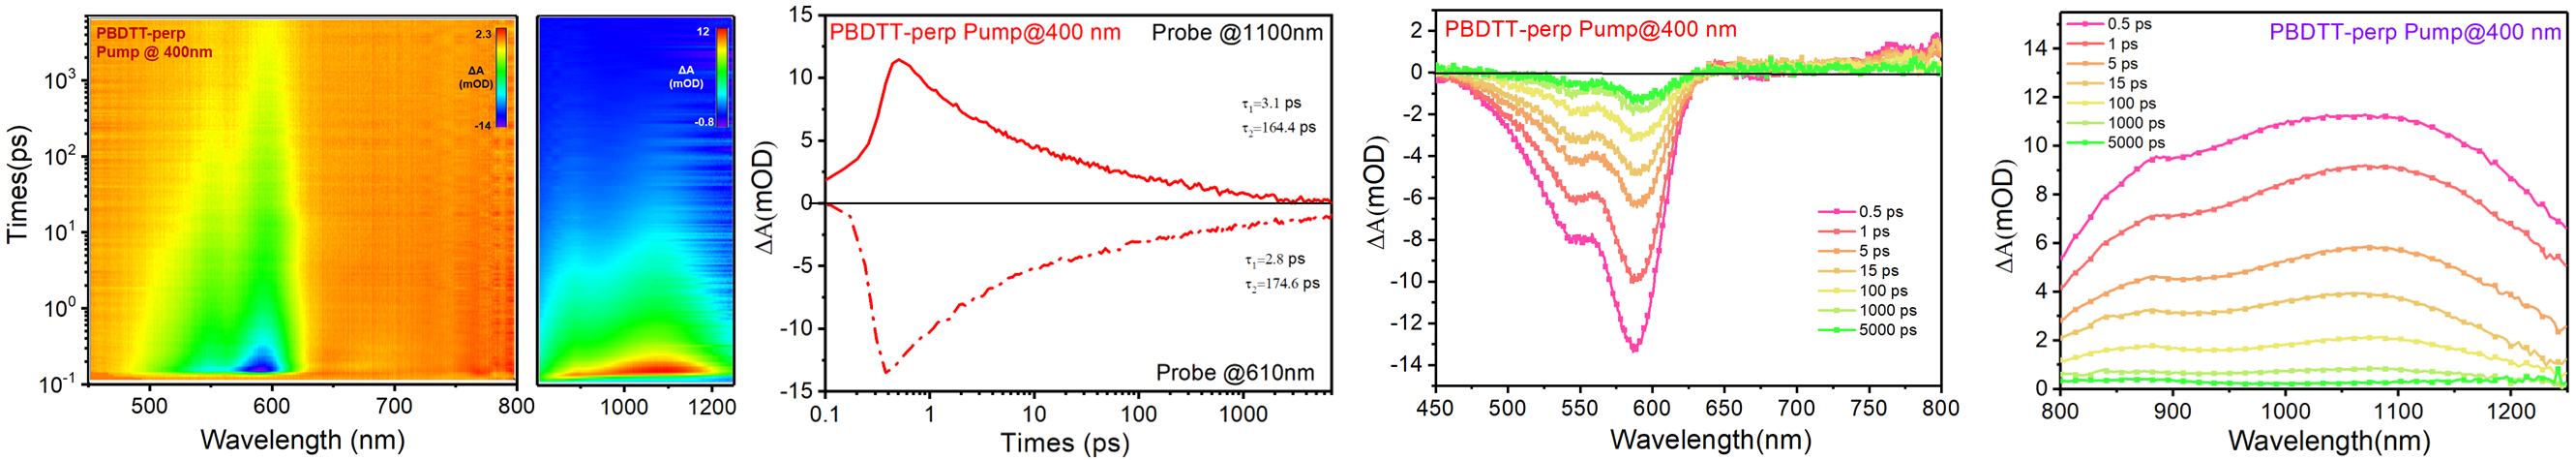
**

**Fig. S34** 2D transient absorption spectra following 400 nm excitation, initial decay kinetics of GSB and PIA signals, absorption curve at different decay times in Vis and NIR region for PBDTT-perp neat films.

**
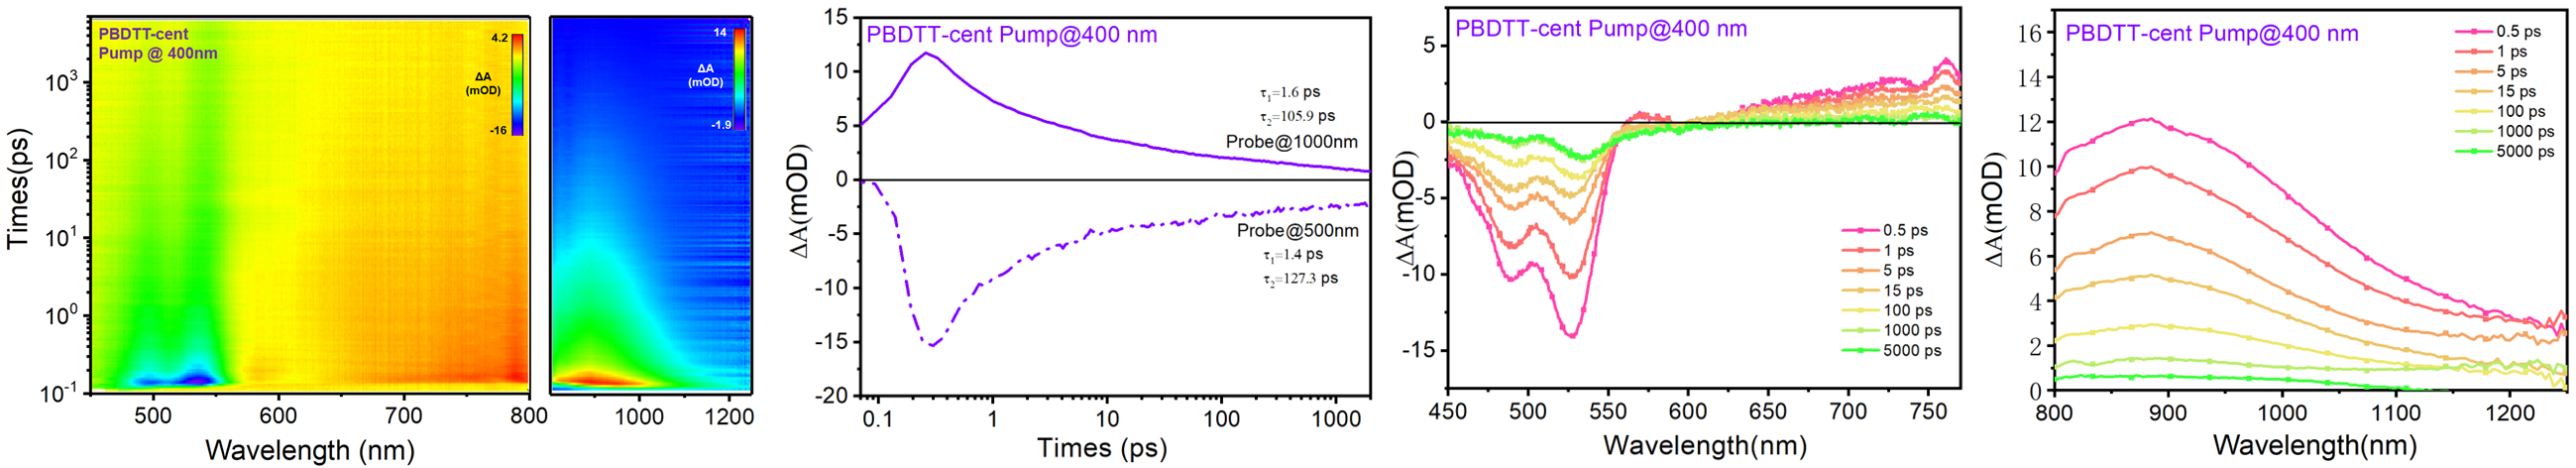
**

**Fig. S35** 2D transient absorption spectra following 400 nm excitation, initial decay kinetics of GSB and PIA signals, absorption curve at different decay times in Vis and NIR region for PBDTT-cent neat films.

**
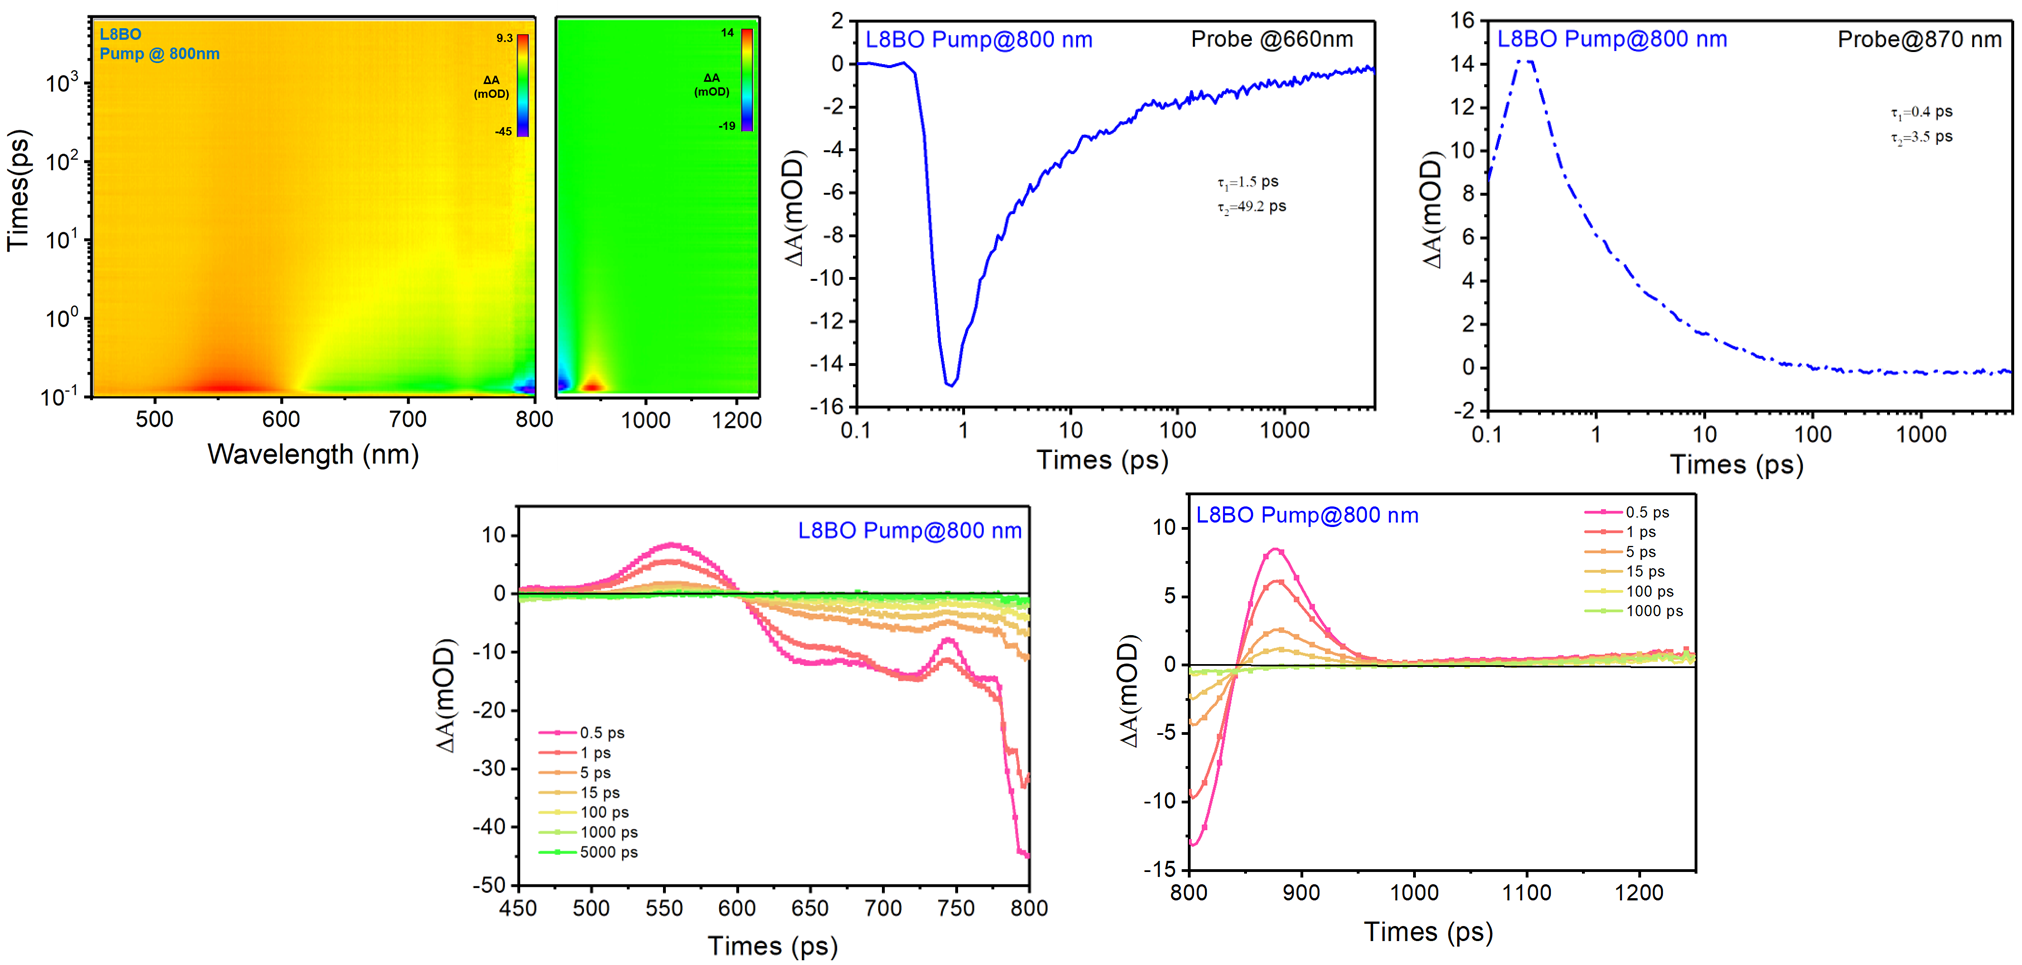
**

**Fig. S36** 2D transient absorption spectra following 800 nm excitation, initial decay kinetics of GSB and PIA signals, absorption curve at different decay times in Vis and NIR region for L8BO neat films.

**
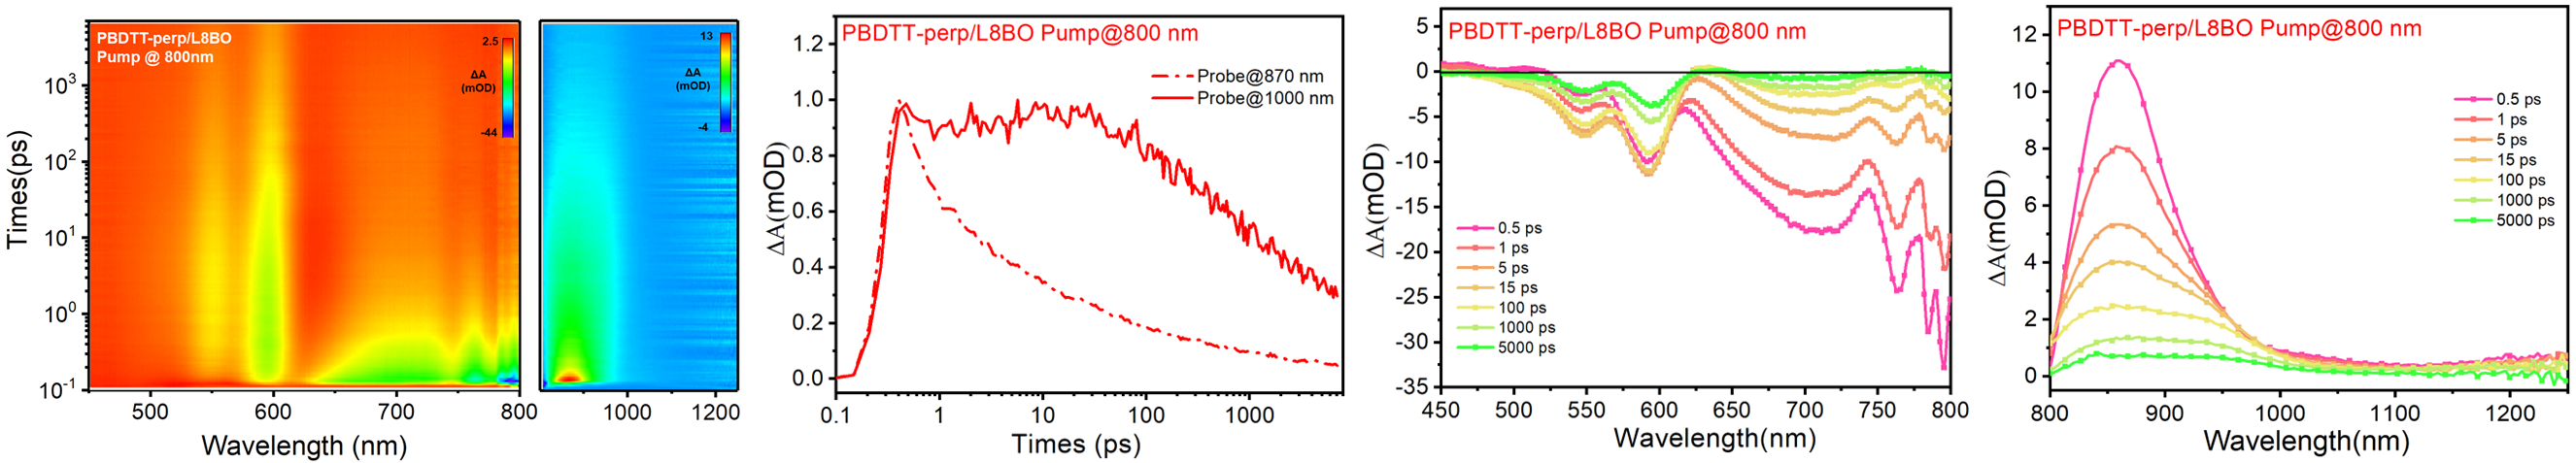
**

**Fig. S37** 2D transient absorption spectra following 800 nm excitation, initial decay kinetics of PIA signals of acceptor and donor, absorption curve at different decay times in Vis and NIR region for PBDTT-perp/L8BO films.

**
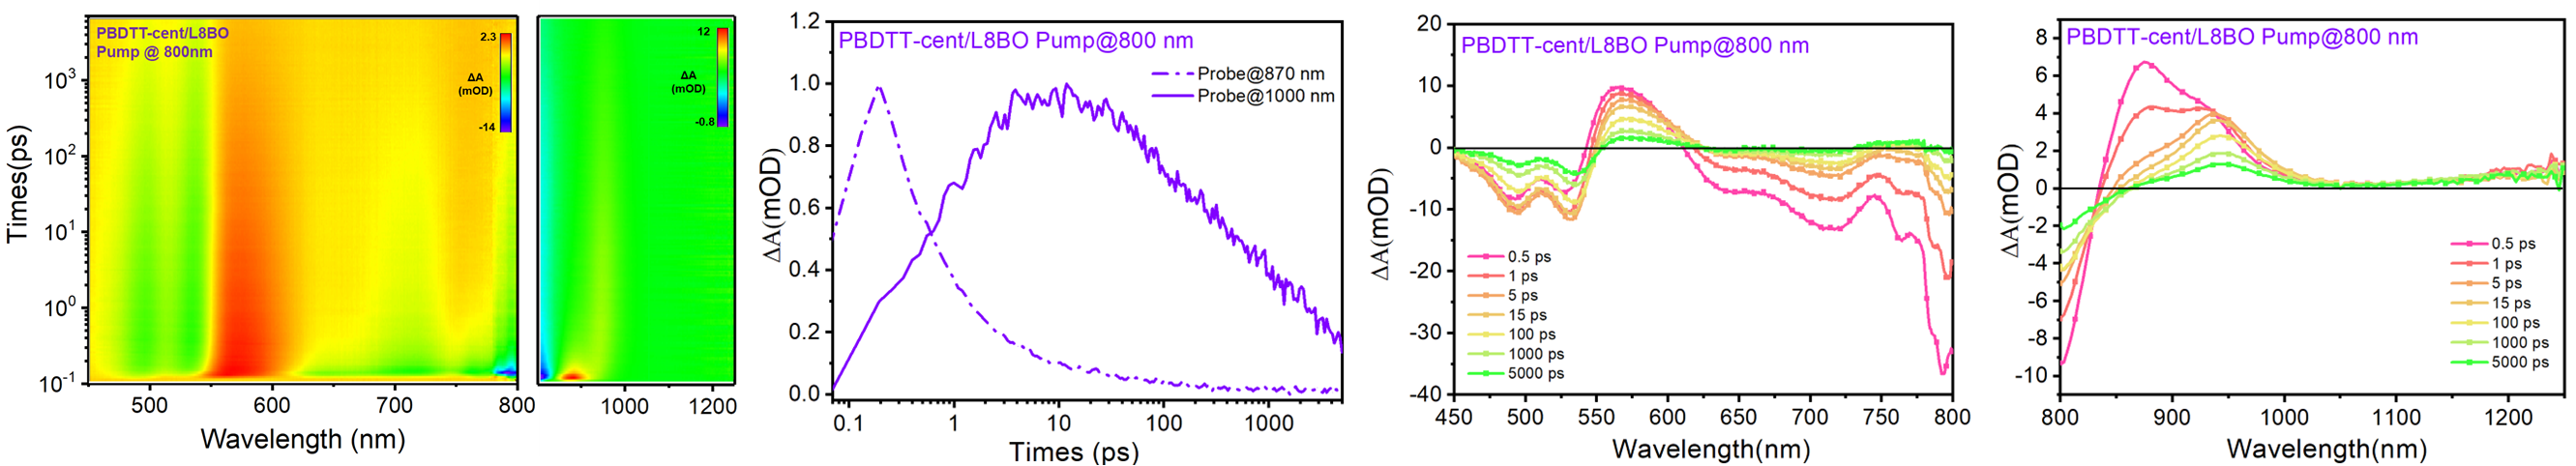
**

**Fig. S38** 2D transient absorption spectra following 800 nm excitation, initial decay kinetics of PIA signals of acceptor and donor, absorption curve at different decay times in Vis and NIR region for PBDTT-cent/L8BO films.

**
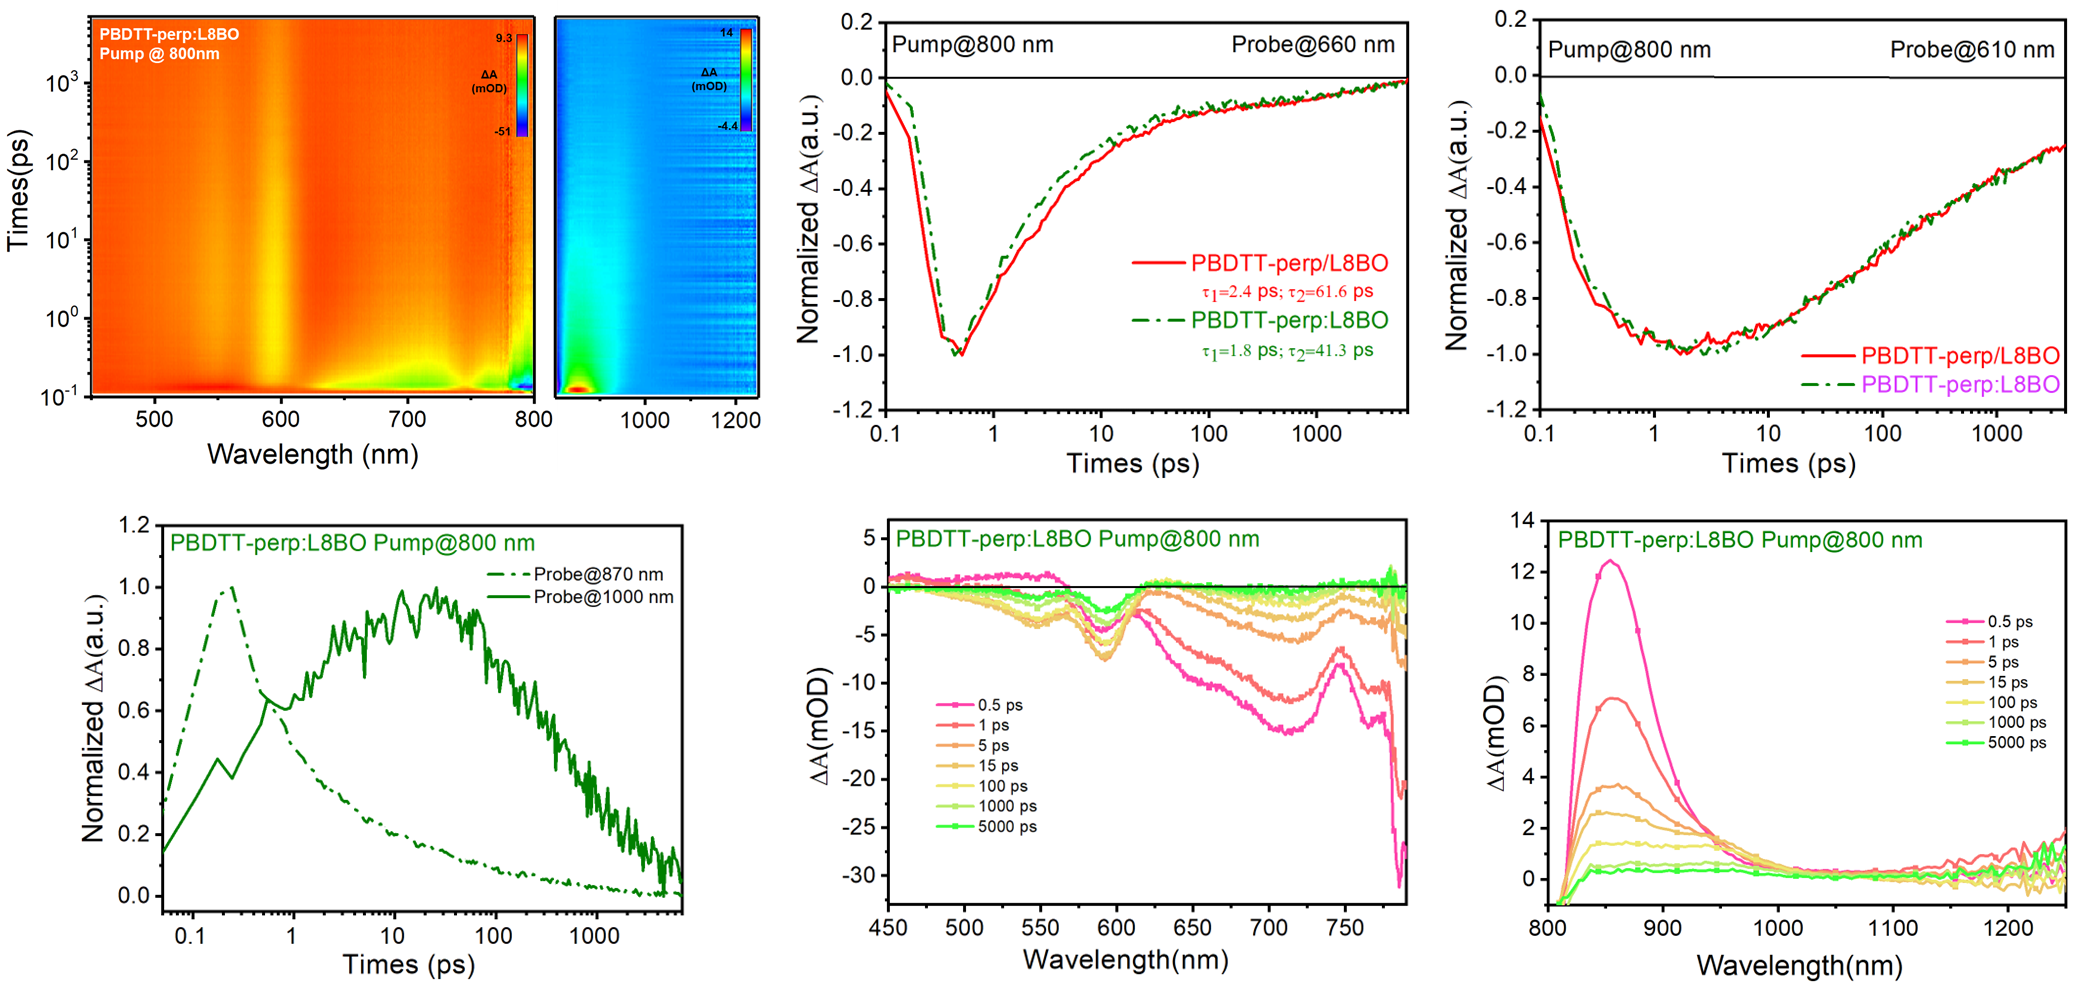
**

**Fig. S39** 2D transient absorption spectra following 800 nm excitation, initial decay kinetics of GSB signals of acceptor and donor, initial decay kinetics of PIA signals of acceptor and donor, absorption curve at different decay times in Vis and NIR region, for PBDTT-cent:L8BO films.

**11. Optimization of Device Performance**

**
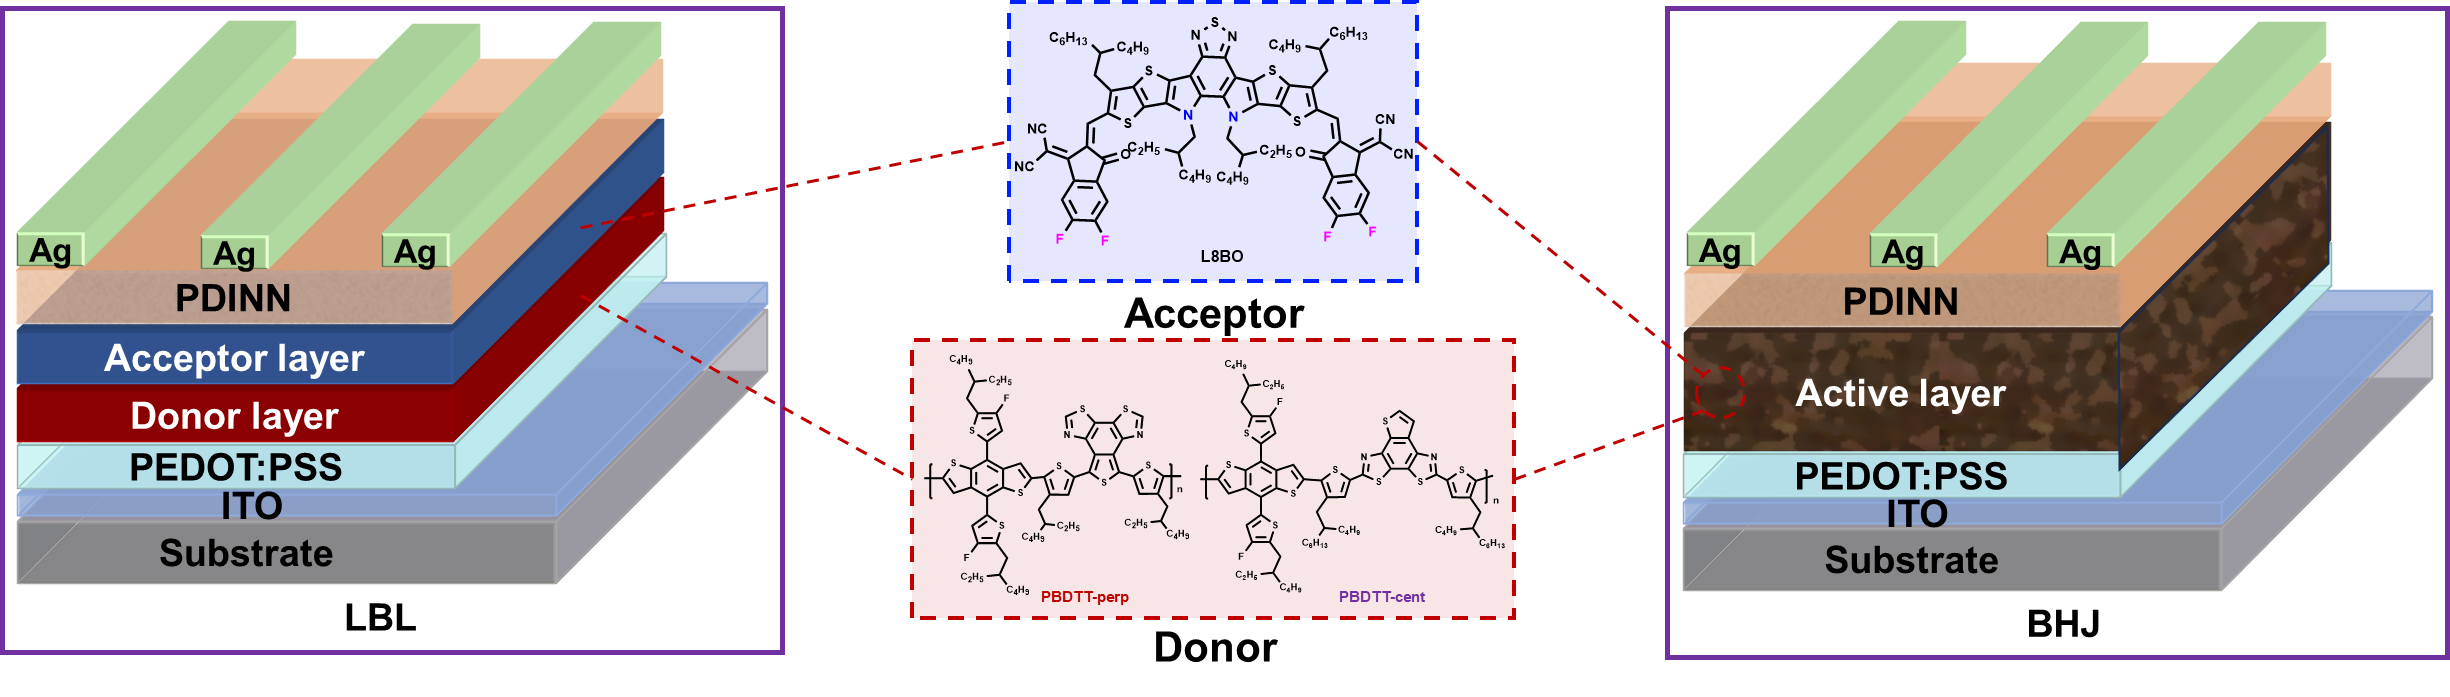
**

**Fig. S40** Device structure and molecular structure.

**Table S5** Optimization of solvent and concentration of PDs for PBDTT-perp/L8BO LBL conventional solar cells.*a*

| Solvent | Concentration  [mg/mL] | *V*OC  [V] | *J*SC  [mA/cm2] | FF  [%] | PCE  [%] |
| --- | --- | --- | --- | --- | --- |
| CF | 4.6 | 0.905 | 23.58 | 70.69 | 15.08(14.82)*b* |
| 5.0 | 0.906 | 23.92 | 73.41 | 15.90(15.19) |
| 5.4 | 0.902 | 24.07 | 72.05 | 15.64(15.05) |
| CB | 5.0 | 0.909 | 24.17 | 72.84 | 16.01 (15.73) |
| 5.4 | 0.911 | 24.04 | 74.27 | 16.26 (16.02) |
| 5.7 | 0.911 | 24.11 | 72.60 | 15.91 (15.64) |

*a* Concentration and spin-coating condition: 8.6 mg/mL in CF for L8-BO, 2500 rpm for 30 s.

*b*Data in parentheses are average for 10 cells.

**Table S6** Optimization of annealing time for PBDTT-perp:L8BO conventional solar cells.*a*

| Annealing  [min] | *V*OC  [V] | *J*SC  [mA/cm2] | FF  [%] | PCE  [%] |
| --- | --- | --- | --- | --- |
| 0 | 0.911 | 24.04 | 74.27 | 16.26 (16.02) *b* |
| 3 | 0.906 | 25.07 | 76.03 | 17.28 (16.89) |
| 5 | 0.905 | 25.44 | 77.23 | 17.82(17.46) |
| 7 | 0.903 | 24.83 | 75.52 | 16.94(16.44) |

*a* Concentration and spin-coating condition: 5.4 mg/mL in CB for PBDTT-perp, 3000 rpm for 30 s. 8.6 mg/mL in CF for L8-BO, 2500 rpm for 30 s. 90 oC for annealing process.

*b*Data in parentheses are average for 10 cells.

**Table S7** Optimization of TCB content for PBDTT-perp/L8BO LBL conventional solar cells.*a*

| Concentration  [mg/mL] | | *V*OC  [V] | *J*SC  [mA/cm2] | FF  [%] | PCE  [%] |
| --- | --- | --- | --- | --- | --- |
| D | A |
| 0 | 0 | 0.905 | 25.44 | 77.23 | 17.82(17.46) *b* |
| 0 | 4 | 0.906 | 25.79 | 78.58 | 18.41(18.09) |
| 4 | 4 | 0.901 | 26.31 | 79.17 | 18.82 (18.50) |
| 6 | 3 | 0.907 | 26.78 | 79.22 | 19.25 (19.03) |

*a* Concentration and spin-coating condition: 5.4 mg/mL in CB for PBDTT-perp, 3000 rpm for 30 s. 8.6 mg/mL in CF for L8-BO, 2500 rpm for 30 s. 90 oC for 5 min in annealing process.

*b*Data in parentheses are average for 10 cells.

**Table S8** Optimization of solvent and concentration of PDs for PBDTT-cent/L8BO LBL conventional solar cells.*a*

| Solvent | Concentration  [mg/mL] | *V*OC  [V] | *J*SC  [mA/cm2] | FF  [%] | PCE  [%] |
| --- | --- | --- | --- | --- | --- |
| CF | 7.2 | 0.937 | 13.23 | 55.08 | 6.83(6.27)*b* |
| 7.6 | 0.935 | 13.84 | 57.49 | 7.44 (6.69) |
| 8.0 | 0.938 | 12.18 | 53.42 | 6.10 (5.47) |
| CB | 7.2 | 0.929 | 10.67 | 46.85 | 4.64 (3.83) |
| 7.6 | 0.932 | 11.92 | 44.31 | 4.92 (4.31) |
| 8.0 | 0.928 | 10.21 | 49.53 | 4.69(3.97) |

*a* Concentration and spin-coating condition: 8.6 mg/mL in CF for L8-BO, 2500 rpm for 30 s.

*b*Data in parentheses are average for 10 cells.

**Table S9** Optimization of annealing time for PBDTT-cent:L8BO conventional solar cells.*a*

| Annealing  [min] | *V*OC  [V] | *J*SC  [mA/cm2] | FF  [%] | PCE  [%] |
| --- | --- | --- | --- | --- |
| 0 | 0.935 | 13.84 | 57.49 | 7.44 (6.69)*b* |
| 1 | 0.931 | 15.49 | 58.75 | 8.47(7.67) |
| 3 | 0.922 | 16.04 | 56.24 | 8.32 (7.08) |
| 5 | 0.917 | 14.89 | 55.60 | 7.59 (6.55) |

*a* Concentration and spin-coating condition: 7.6 mg/mL in CF for PBDTT-cent, 2200 rpm for 30 s. 8.6 mg/mL in CF for L8-BO, 2500 rpm for 30 s. 90 oC for annealing process.

*b*Data in parentheses are average for 10 cells.

**Table S10** Optimization of TCB content for PBDTT-cent/L8BO LBL conventional solar cells.*a*

| Concentration  [mg/mL] | | *V*OC  [V] | *J*SC  [mA/cm2] | FF  [%] | PCE  [%] |
| --- | --- | --- | --- | --- | --- |
| D | A |
| 0 | 0 | 0.931 | 15.49 | 58.75 | 8.47(7.67)*b* |
| 0 | 4 | 0.926 | 15.79 | 61.26 | 8.96 (8.05) |
| 4 | 4 | 0.926 | 16.21 | 65.60 | 9.85 (9.11) |
| 6 | 3 | 0.925 | 17.30 | 66.93 | 10.72 (9.63) |

*a* Concentration and spin-coating condition: 7.6 mg/mL in CF for PBDTT-cent, 2200 rpm for 30 s. 8.6 mg/mL in CF for L8-BO, 2500 rpm for 30 s. 90 oC for 1 min in annealing process.

*b*Data in parentheses are average for 10 cells.

**Table S11** Optimization of D/A ratio for PBDTT-perp:L8BO conventional solar cells.*a*

| D/A  [w/w] | *V*OC  [V] | *J*SC  [mA/cm2] | FF  [%] | PCE  [%] |
| --- | --- | --- | --- | --- |
| 1:1 | 0.905 | 24.46 | 73.41 | 16.25 (15.65)*b* |
| 1:1.2 | 0.908 | 25.05 | 75.38 | 17.15 (16.72) |
| 1:1.4 | 0.909 | 25.14 | 76.82 | 17.55 (17.01) |
| 1:1.6 | 0.903 | 24.23 | 75.59 | 16.54 (16.42) |

*a*Blend solution: 5.2 mg/mL in CF for PBDTT-perp; spin-coating: 2500 rpm for 30 s. 90 oC for 3 min in annealing process.

*b*Data in parentheses are average for 10 cells.

**Table S12** Optimization of active layer thickness for PBDTT-perp:L8BO conventional solar cells.*a*

| Thickness  [nm] | *V*OC  [V] | *J*SC  [mA/cm2] | FF  [%] | PCE  [%] |
| --- | --- | --- | --- | --- |
| 169 | 0.907 | 25.53 | 73.90 | 17.11 (17.03)*b* |
| 143 | 0.904 | 25.94 | 75.72 | 17.75(17.25) |
| 129 | 0.909 | 25.14 | 76.78 | 17.55 (17.01) |
| 114 | 0.907 | 24.92 | 76.53 | 17.29 (17.09) |
| 101 | 0.908 | 24.35 | 71.71 | 15.85 (15.16) |

*a*D/A ratio: 1:1.4 (w/w); blend solution: 5.2 mg/mL in CF for PBDTT-perp. 90 oC for 3 min in annealing process.

*b*Data in parentheses are averages for 10 cells.

**Table S13** Optimization of TCB content for PBDTT-perp:L8BO conventional solar cells.*a*

| Concentration  [mg/mL] | *V*OC  [V] | *J*SC  [mA/cm2] | FF  [%] | PCE  [%] |
| --- | --- | --- | --- | --- |
| 0 | 0.904 | 25.94 | 75.70 | 17.75(17.25)*b* |
| 2 | 0.903 | 25.58 | 76.53 | 17.68(17.55) |
| 4 | 0.906 | 25.89 | 77.63 | 18.21(18.02) |
| 6 | 0.900 | 25.99 | 77.02 | 18.01 (17.84) |

*a* D/A ratio: 1:1.4 (w/w); blend solution: 5.2 mg/mL in CF for PBDTT-perp; spin-coating: 2500 rpm for 30 s. 90 oC for 3 min in annealing process.

*b*Data in parentheses are average for 10 cells.

**Table S14** Optimization of D/A ratio for PBDTT-cent:L8BO conventional solar cells.*a*

| D/A  [w/w] | *V*OC  [V] | *J*SC  [mA/cm2] | FF  [%] | PCE  [%] |
| --- | --- | --- | --- | --- |
| 1:1 | 0.928 | 17.58 | 60.25 | 9.83(9.63)*b* |
| 1:1.2 | 0.924 | 18.76 | 65.05 | 11.27(10.76) |
| 1:1.4 | 0.921 | 17.99 | 62.25 | 10.31 (10.02) |
| 1:1.6 | 0.921 | 16.24 | 60.83 | 9.10 (8.87) |

*a*Blend solution: 7.6 mg/mL in CF for PBDTT-cent; spin-coating: 3000 rpm for 30 s. 90 oC for 3 min in annealing process.

*b*Data in parentheses are average for 10 cells.

**Table S15** Optimization of active layer thickness for PBDTT-cent:L8BO conventional solar cells.*a*

| Thickness  [nm] | *V*OC  [V] | *J*SC  [mA/cm2] | FF  [%] | PCE  [%] |
| --- | --- | --- | --- | --- |
| 164 | 0.926 | 18.87 | 59.69 | 10.43 (10.01)*b* |
| 147 | 0.924 | 18.76 | 65.05 | 11.27(10.76) |
| 126 | 0.921 | 17.73 | 64.28 | 10.50 (10.26) |
| 91 | 0.928 | 16.28 | 67.29 | 10.17 (9.42) |

*a*D/A ratio: 1:1.2 (w/w); blend solution: 7.6 mg/mL in CF for PBDTT-cent. 90 oC for 3 min in annealing process.

*b*Data in parentheses are average for 10 cells.

**Table S16** Optimization of TCB content for PBDTT-cent:L8BO conventional solar cells.*a*

| Concentration  [mg/mL] | *V*OC  [V] | *J*SC  [mA/cm2] | FF  [%] | PCE  [%] |
| --- | --- | --- | --- | --- |
| 0 | 0.924 | 18.76 | 65.05 | 11.27(10.76) *b* |
| 2 | 0.912 | 18.38 | 66.53 | 11.15(10.55) |
| 4 | 0.906 | 18.79 | 64.63 | 11.00(10.02) |
| 6 | 0.906 | 17.99 | 65.02 | 10.60 (9.84) |

*a*D/A ratio: 1:1.2 (w/w); blend solution: 7.6 mg/mL in CF for PBDTT-cent; spin-coating: 3000 rpm for 40 s. 90 oC for 3 min in annealing process.

*b*Data in parentheses are average for 10 cells.

**12. Exciton Dissociation and Collection Probability**

**
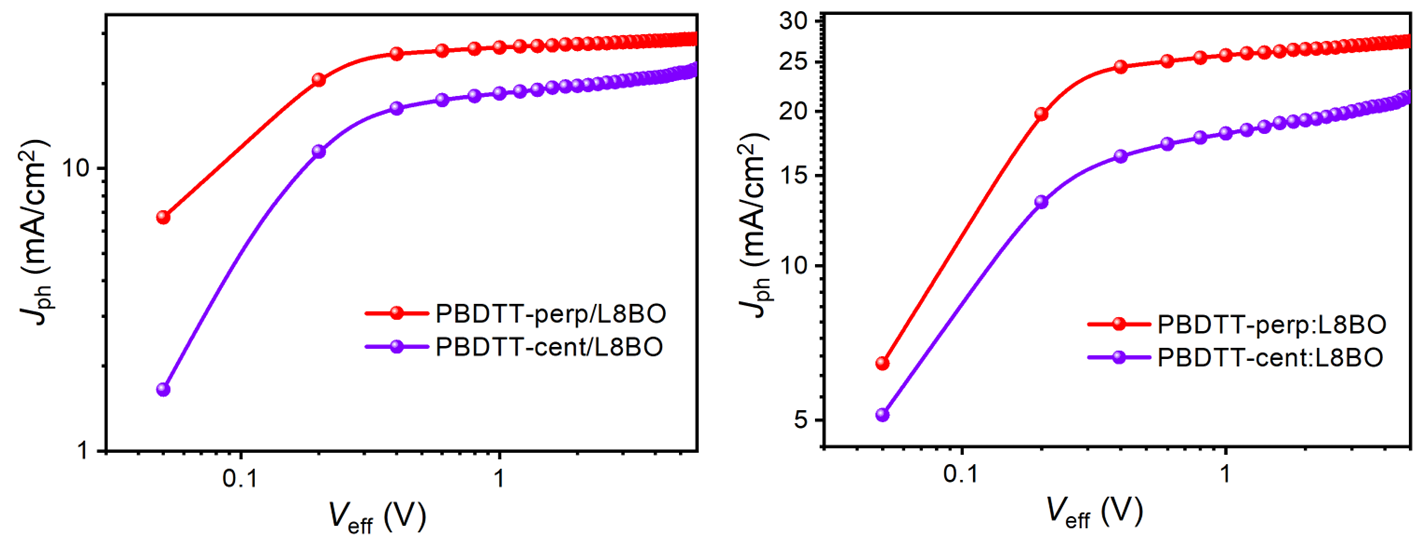
**

**Fig. S41** *J*ph-*V*eff plots.

**Table S17** Exciton dissociation and collection probability.


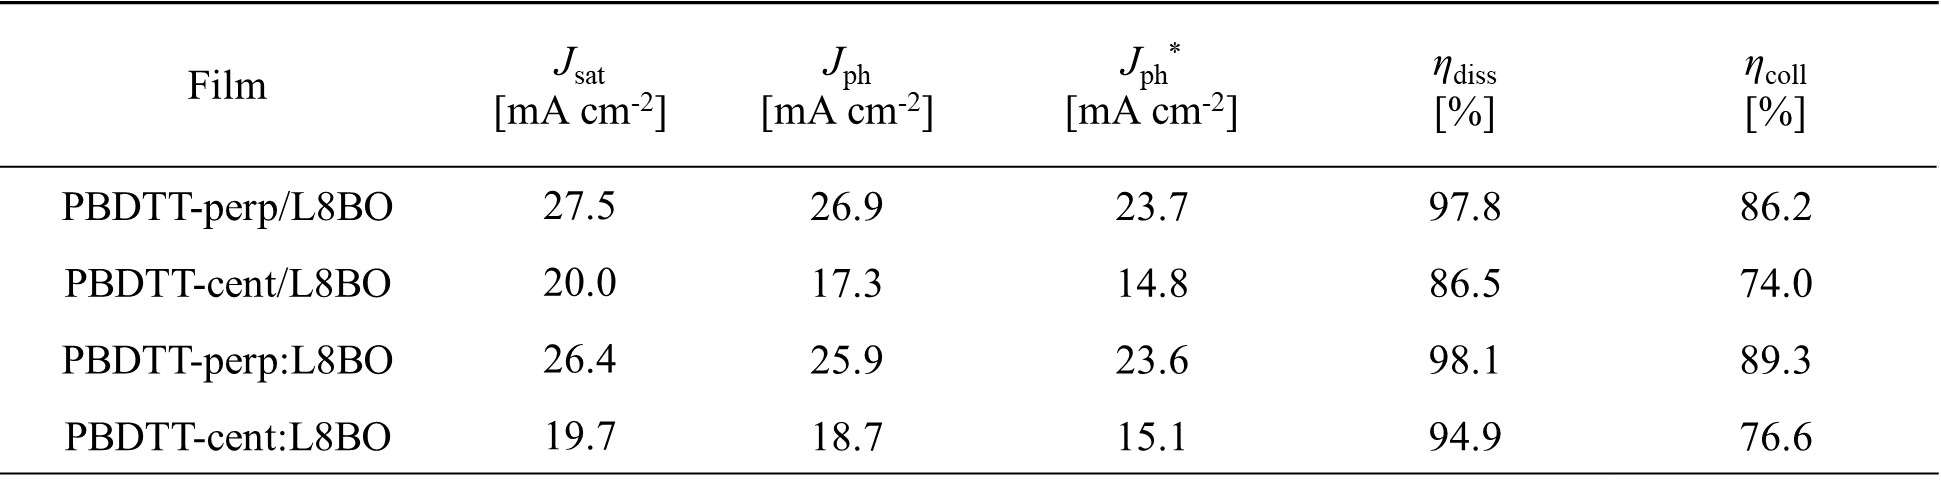


**13. Charge Carrier Mobility**


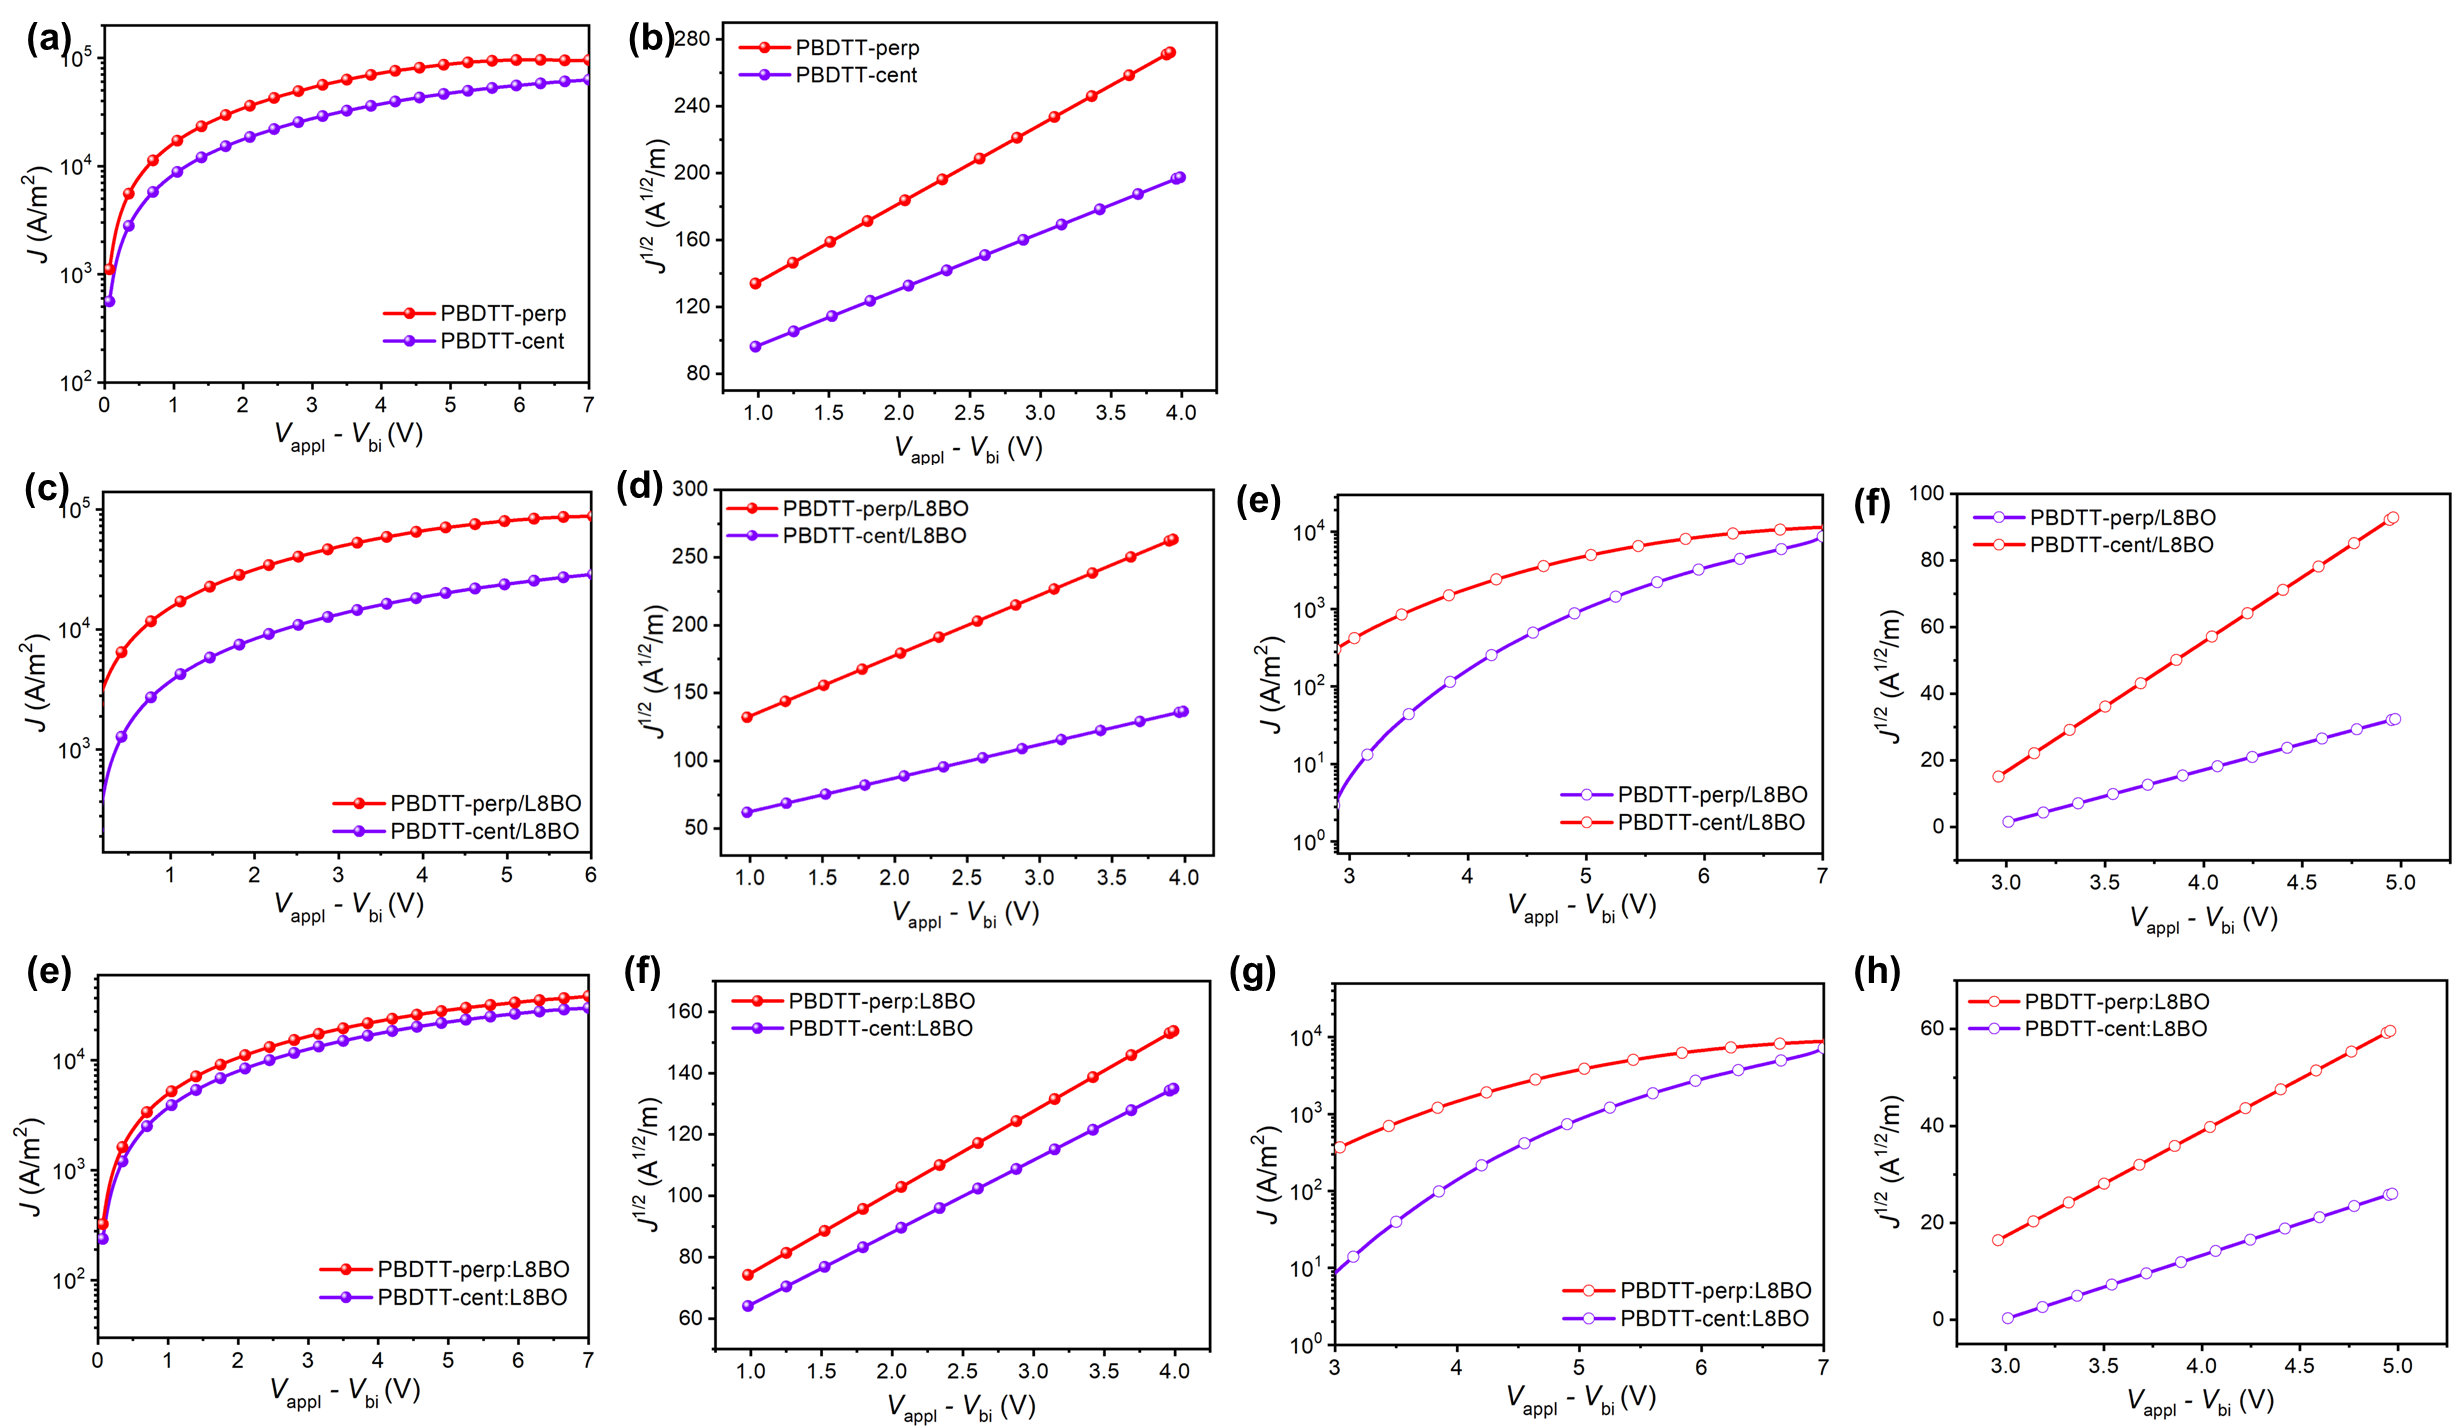


**Fig. S42** *J-V* curves (a) and corresponding *J*1/2*-V* plots (b) for the hole-only devices (in dark) of PBDTT-perp and PBDTT-cent pure films. *J-V* curves (c) and corresponding *J*1/2*-V* plots (d) for the hole-only devices (in dark) of PBDTT-perp/L8BO and PBDTT-cent/L8BO films. *J-V* curves (e) and corresponding *J*1/2*-V* plots (f) for the electron-only devices (in dark) of PBDTT-perp/L8BO and PBDTT-cent/L8BO films. *J-V* curves (e) and corresponding *J*1/2*-V* plots (f) for the hole-only devices (in dark) of PBDTT-perp:L8BO and PBDTT-cent:L8BO films. *J-V* curves (g) and corresponding *J*1/2*-V* plots (h) for the electron-only devices (in dark) of PBDTT-perp:L8BO and PBDTT-cent:L8BO films.

**Table S18** Hole mobility and electron mobility.


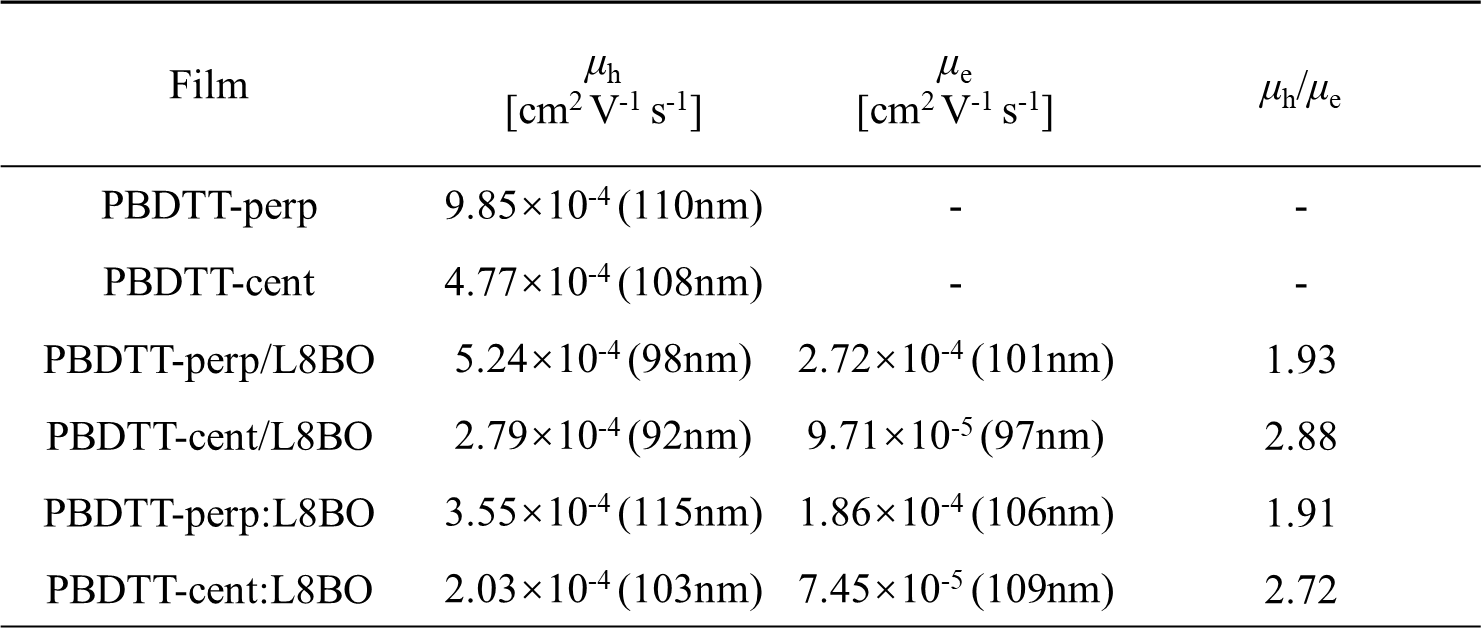


**14. TPC and TPV**


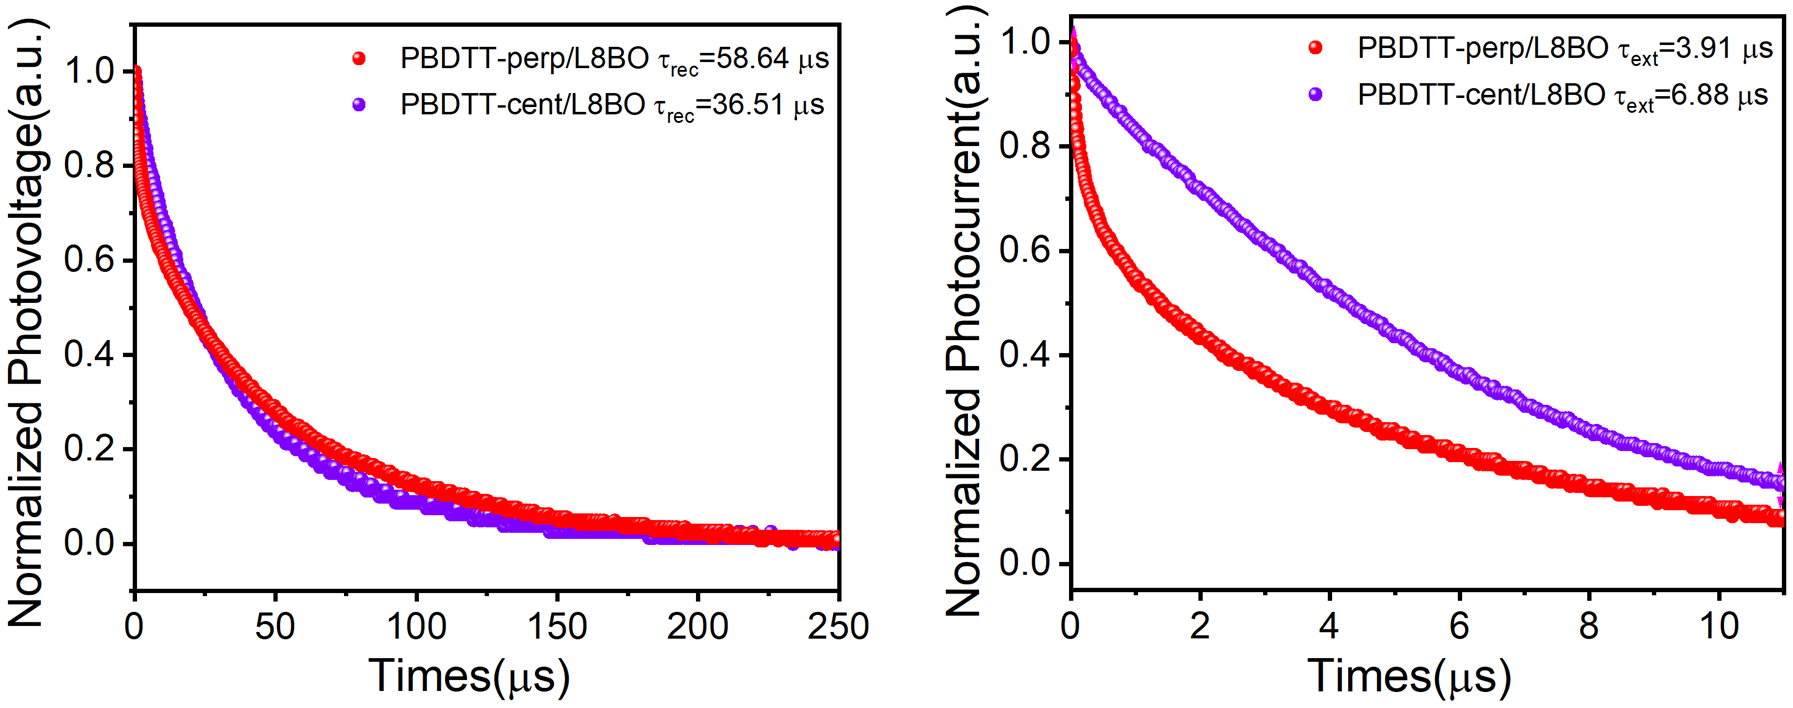


**Fig. S43** TPC and TPV measurements for PBDTT-perp/L8BO and PBDTT-cent/L8BO films.

**15.** **Grazing Incidence Wide Angle X-Ray Scattering Peak Fitting**

**
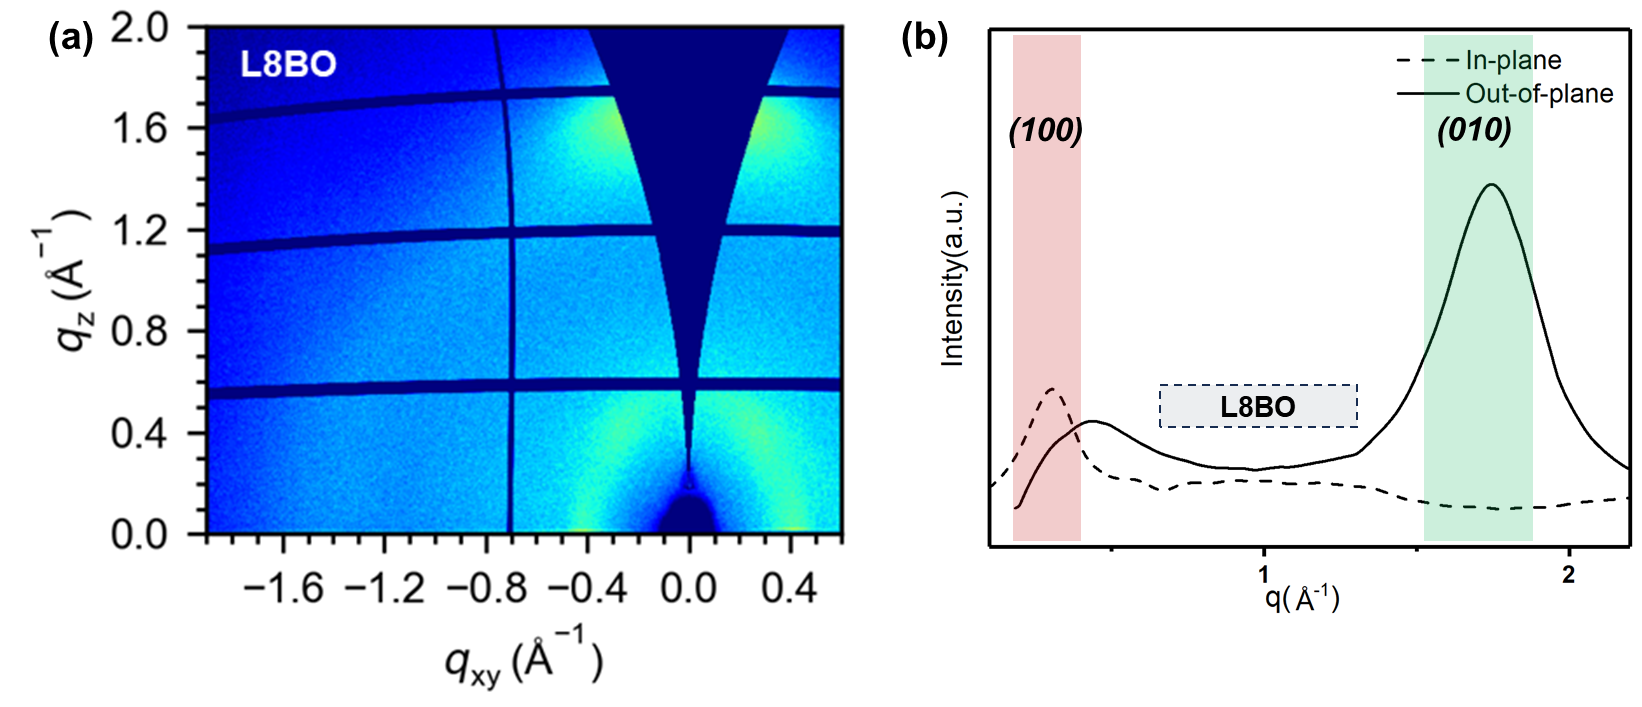
**

**Fig. S44** (a) GIWAXS patterns of L8BO pure films. (b) The corresponding in-plane and out-of-plane line-cuts.

**
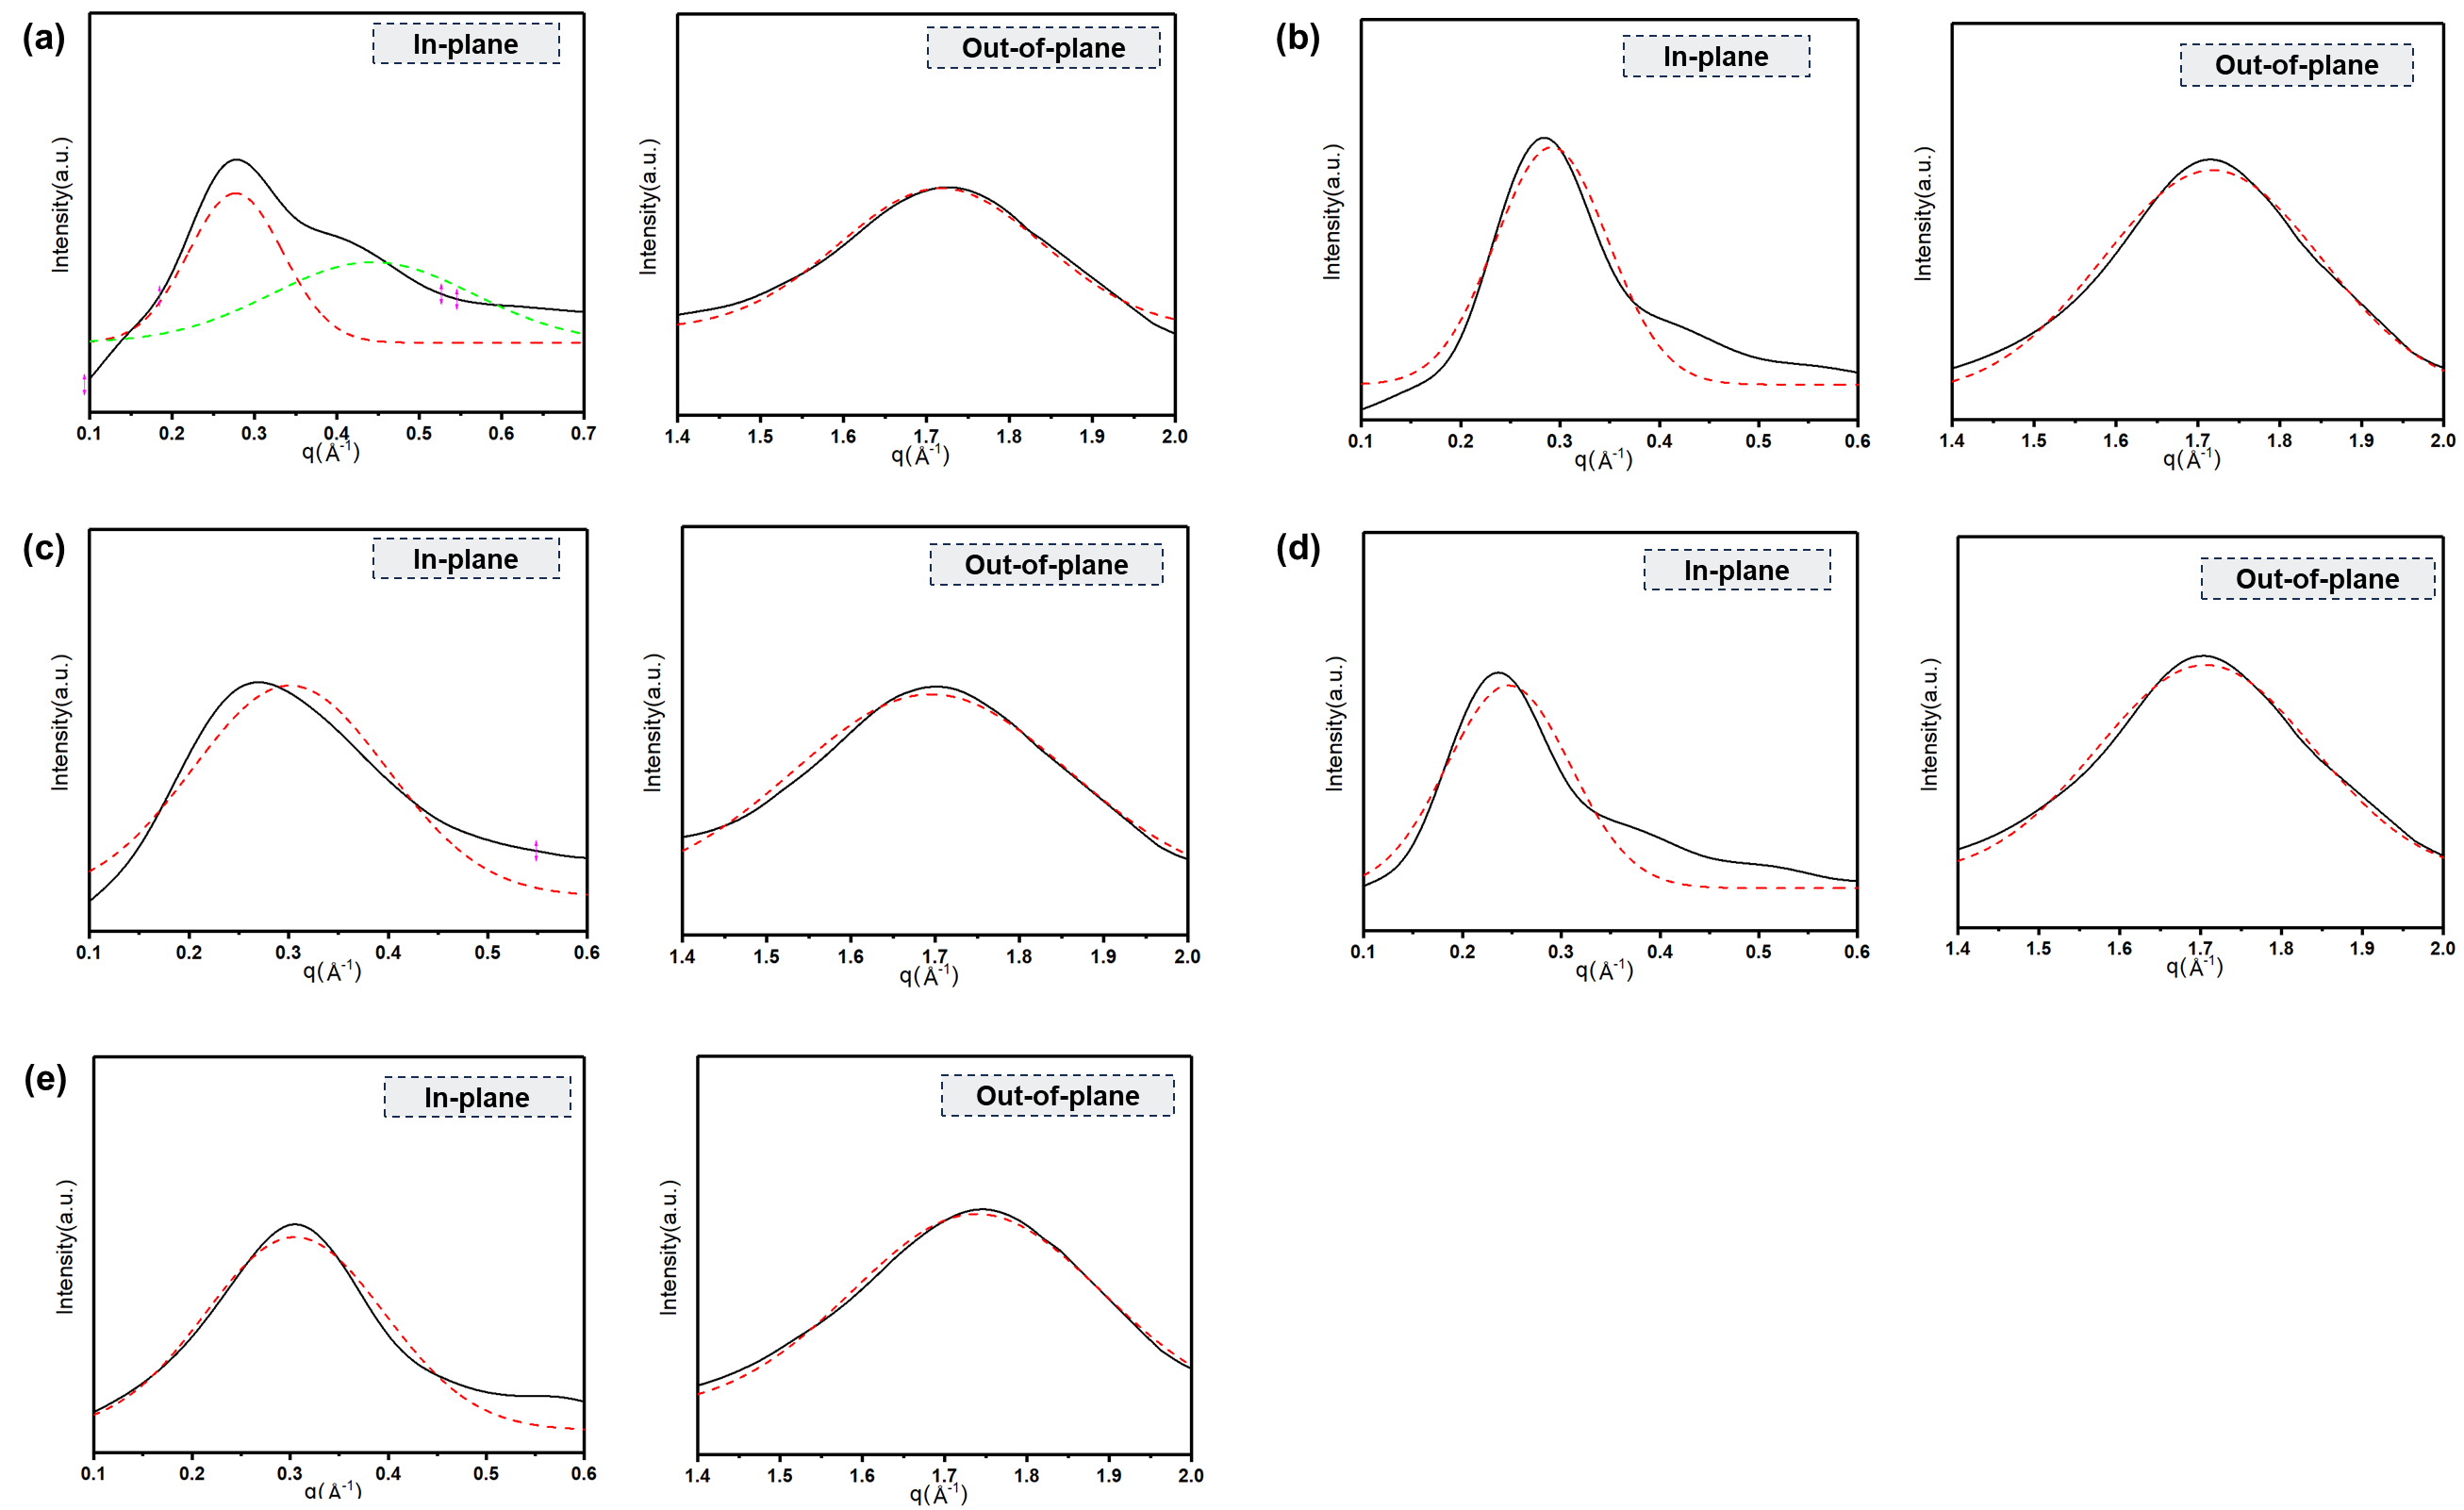
**

**Figure S45** GIWAXS peak fitting for (a) pure PBDTT-perp film, (c) pure PBDTT-cent film, (e) pure L8BO film, (b) PBDTT-cent/L8BO film and (d) PBDTT-cent/L8BO film. Left graph: fitted (100) peak; right graph: fitted (010) peak; black continuous line: original signal; red dash line: fitted substrate signal.

**Table S19** Summary of *d*-spacings and CCLs for PBDTT-perp, PBDTT-cent, L8BO pure films and PBDTT-perp/L8BO, PBDTT-cent/L8BO films.

| Films | *d*-spacing010  (OOP) [Å] | CCL010  (OOP) [Å] | *d*-spacing100  (IP) [Å] | CCL100  (IP) [Å] |
| --- | --- | --- | --- | --- |
| PBDTT-perp | 3.65 | 19.57 | 22.44 | 41.89 |
| PBDTT-cent | 3.72 | 14.73 | 23.27 | 24.69 |
| L8BO | 3.61 | 15.88 | 20.27 | 30.57 |
| PBDTT-perp/L8BO | 3.65 | 17.95 | 21.67 | 42.20 |
| PBDTT-cent/L8BO | 3.70 | 15.84 | 25.13 | 38.46 |

**Table S20** Summary of *q* and FWHMs for pure PBDTT-perp, PBDTT-cent, L8BO neat films and PBDTT-perp/L8BO, PBDTT-cent/L8BO films via gaussian fitting.

**
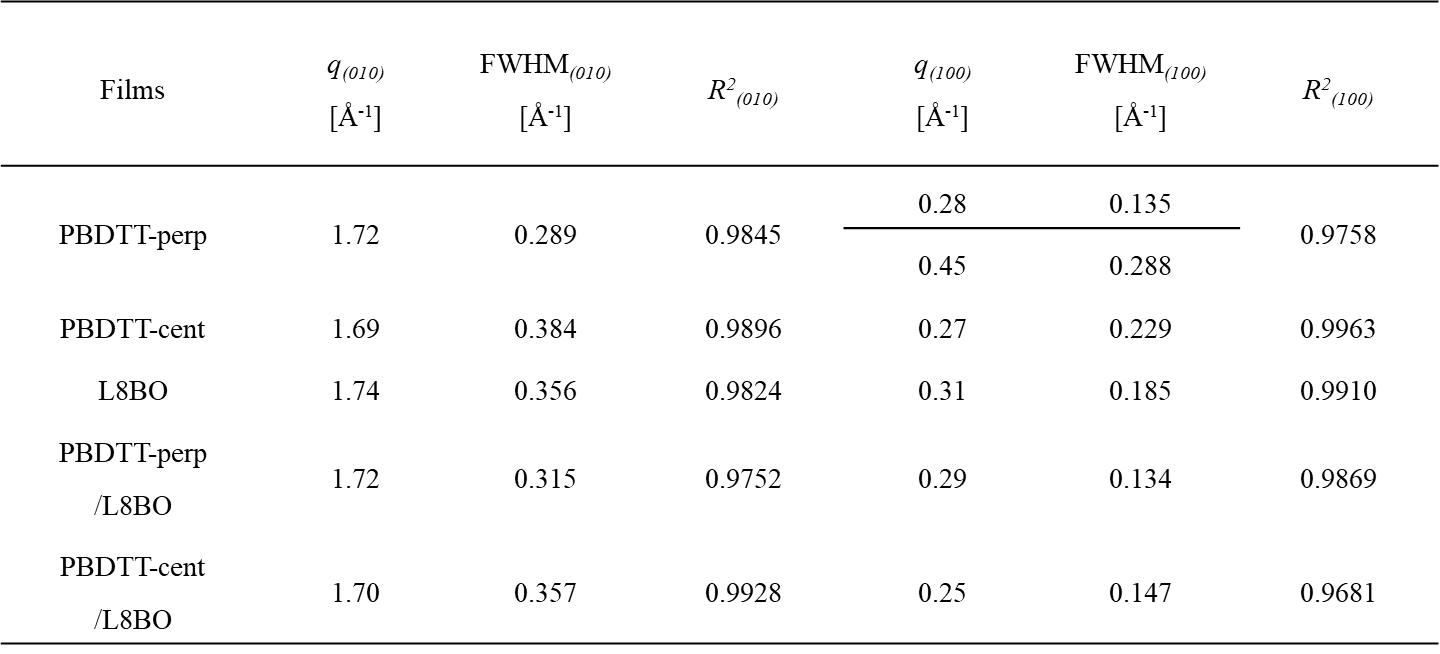
**

**16. Atomic Force Microscope and Transmission Electron Microscope**

**
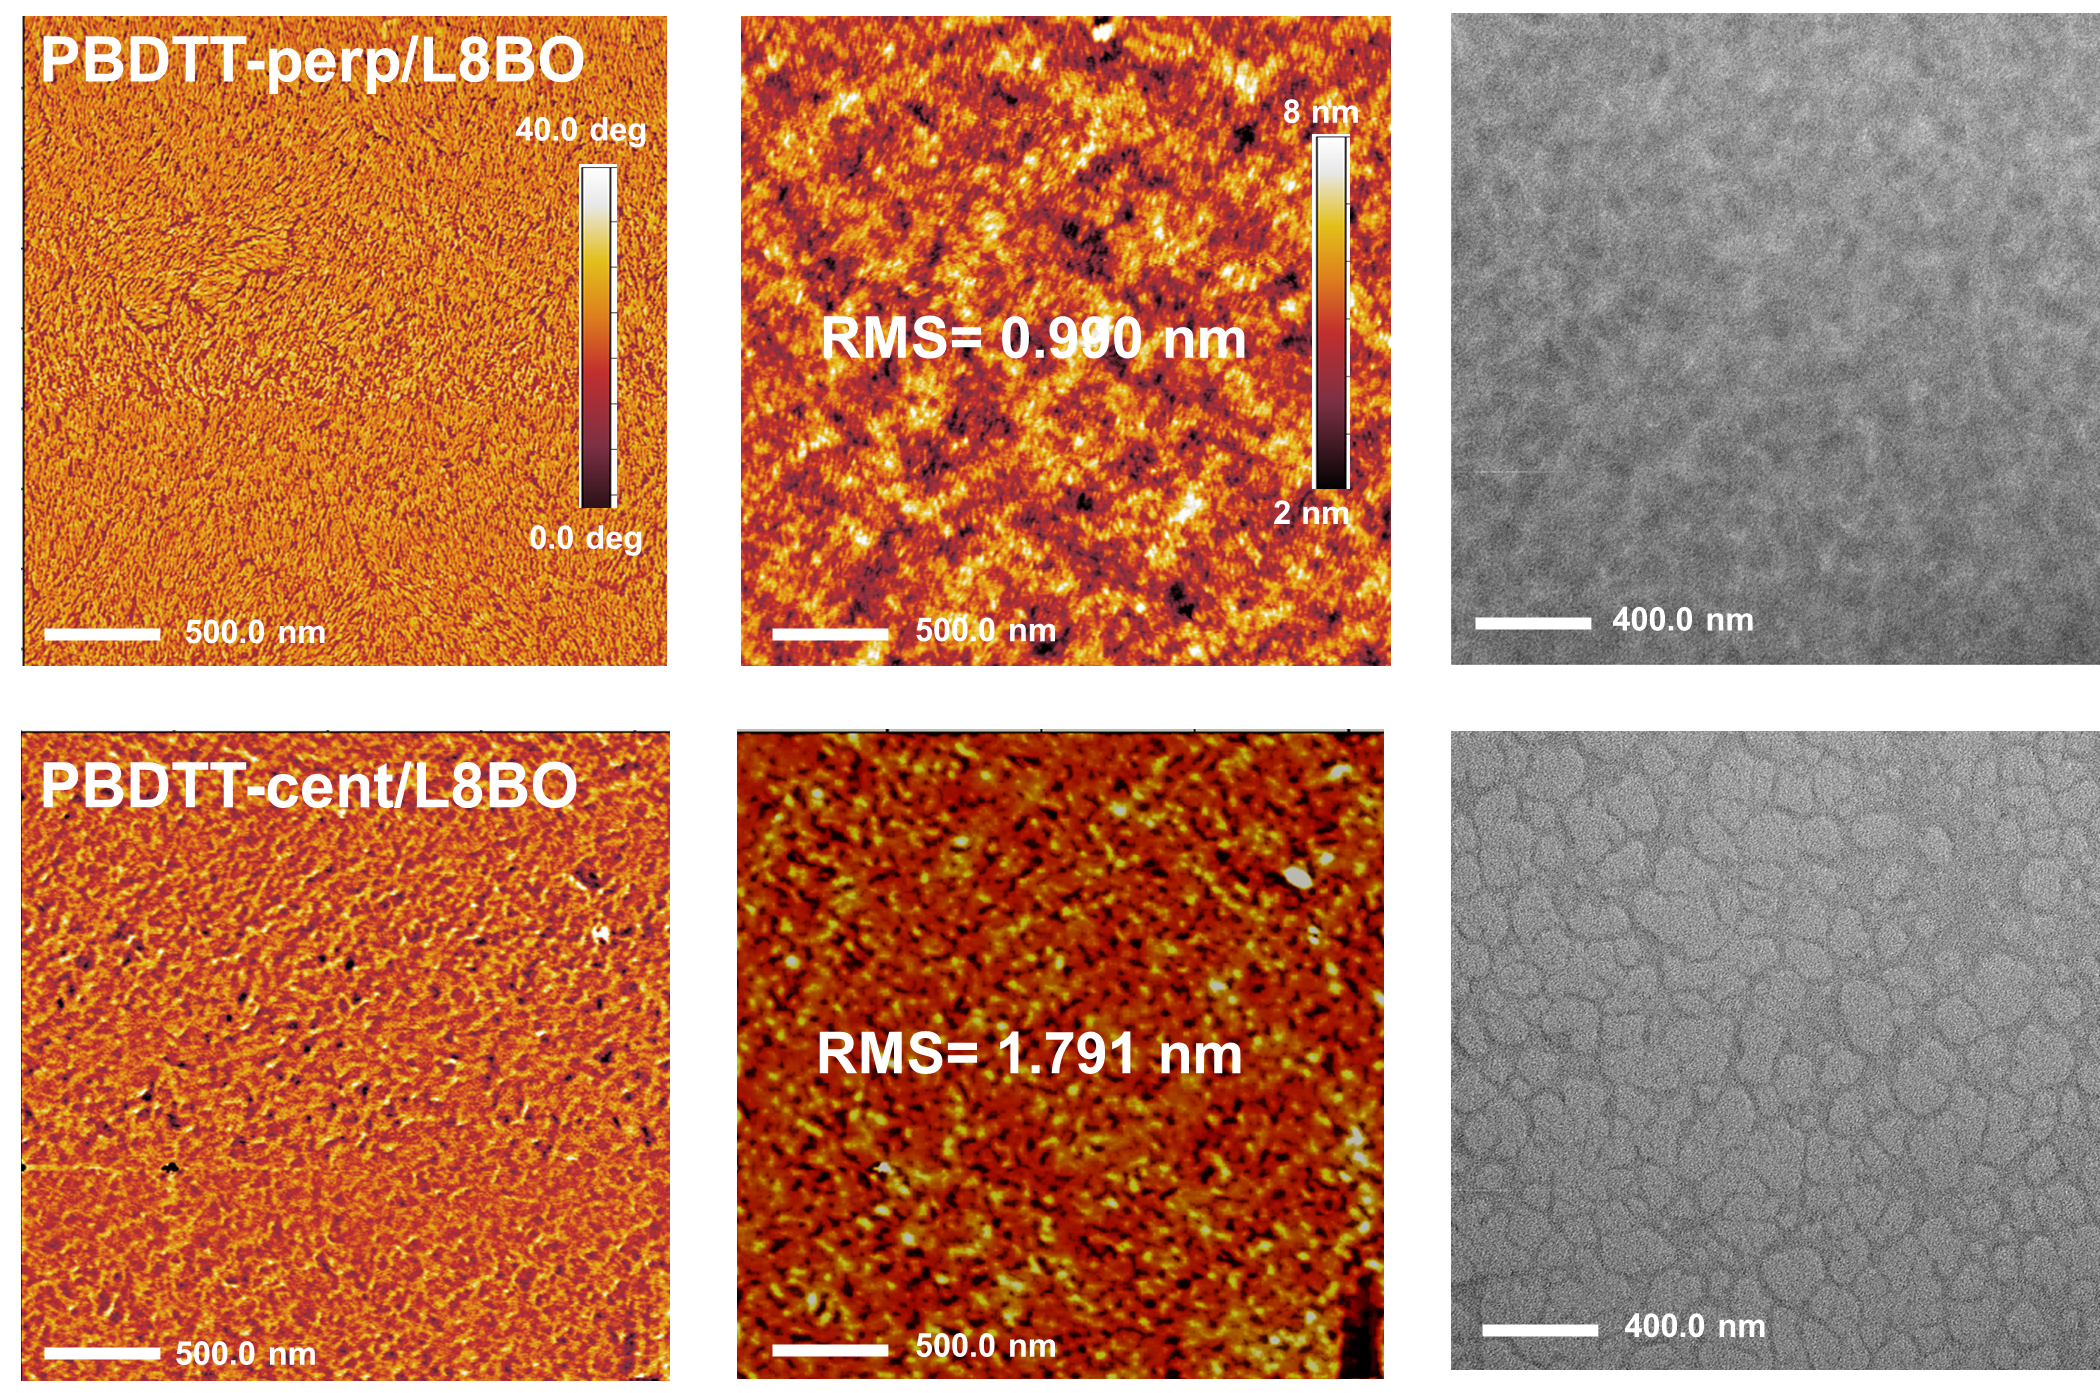
**

**Fig. S46** AMF height, phase image and TEM image for two blend films.

**17. Contact Angles**

**
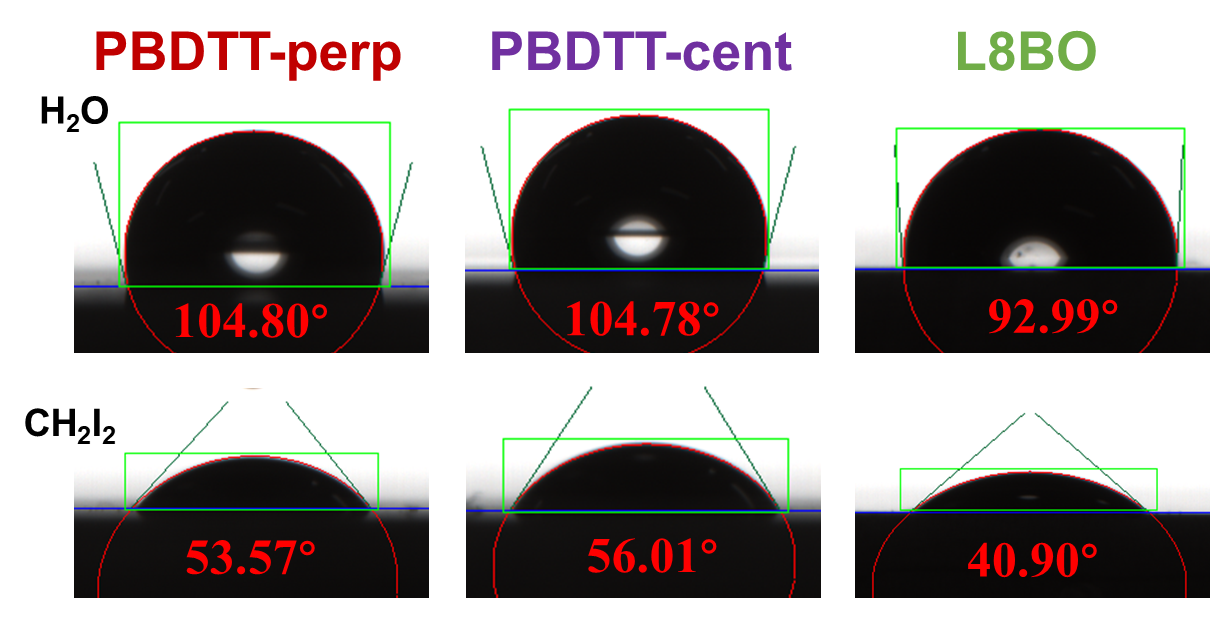
**

**Fig. S47** Contact angle measurements of water and diiodomethane droplets on neat PBDTT-perp, PBDTT-cent, and L8BO films.

**Table S21** Contact angle of two PDs and L8BO, and corresponding calculated surface energy, interaction parameter and interfacial energy with acceptor.


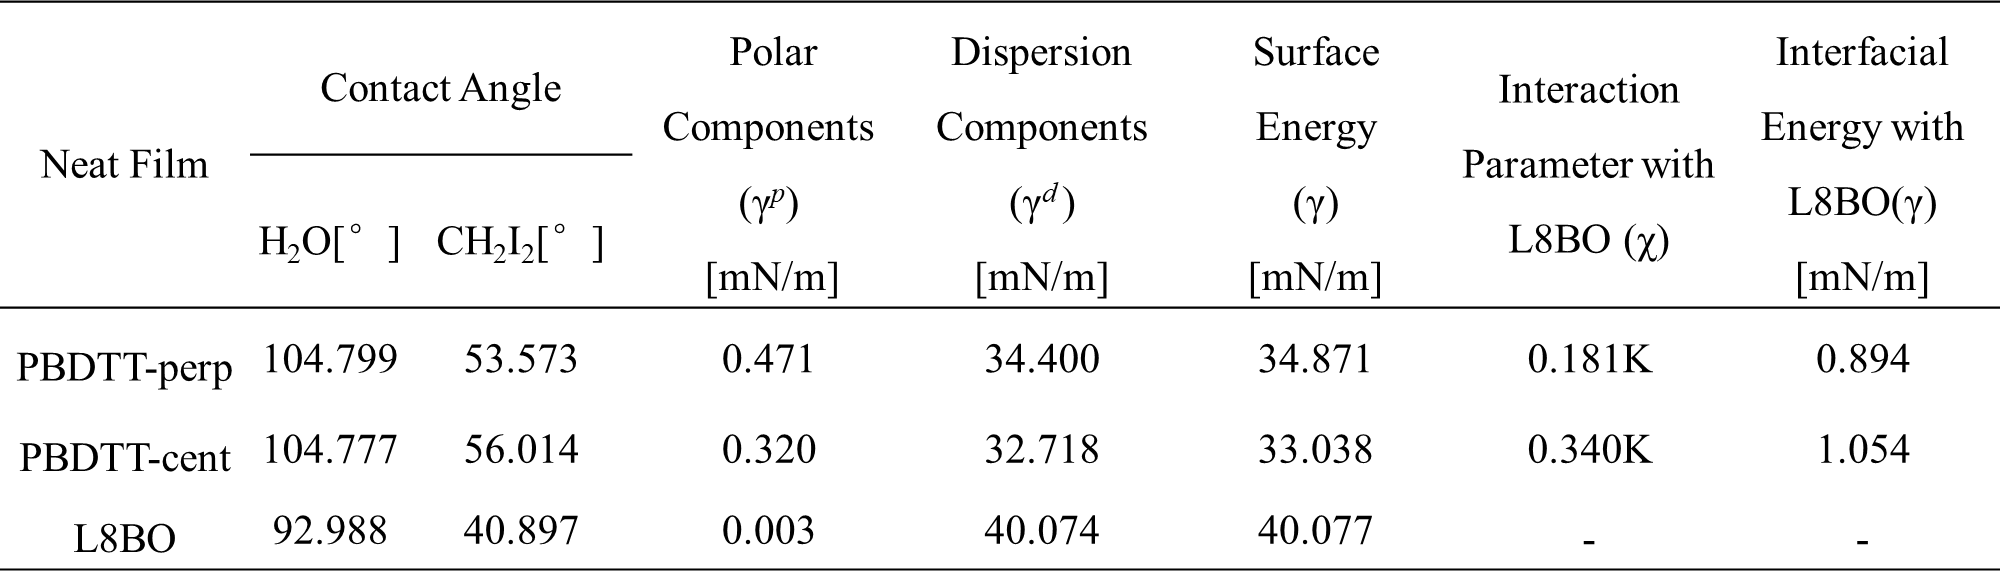


**18. D/D self-aggregation and D/A distribution**


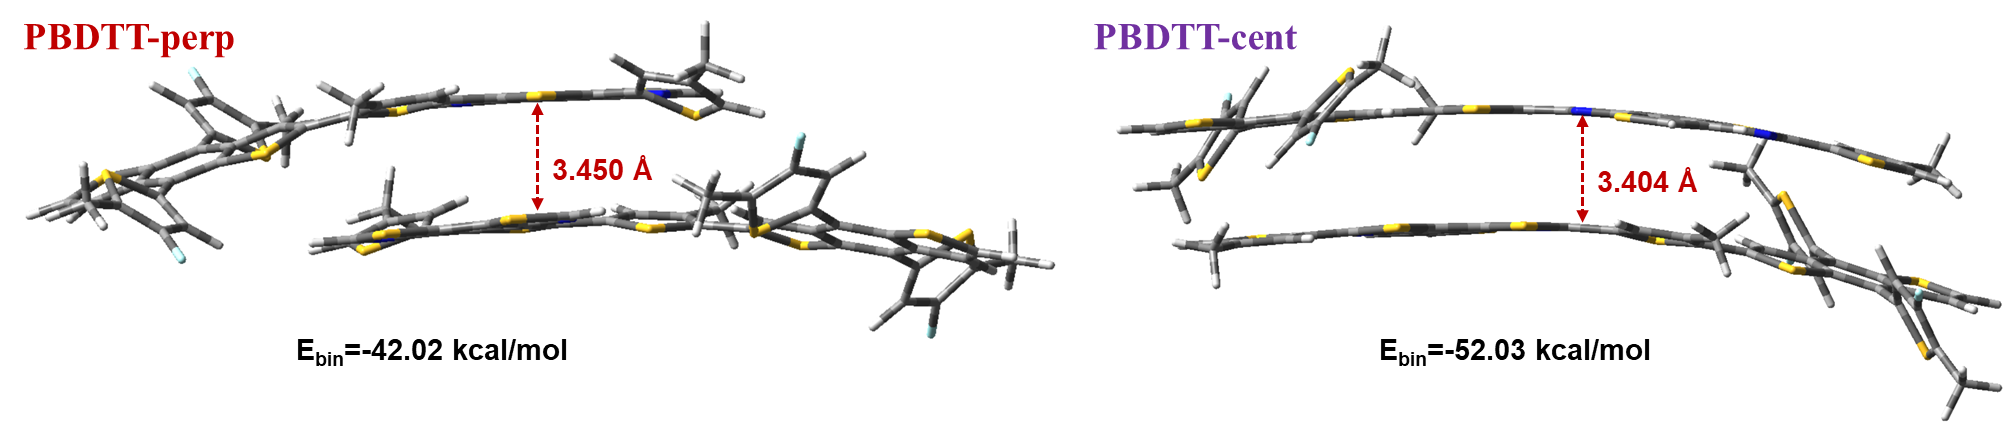


**Fig. S48** Optimized molecular geometries for D/D pairs.


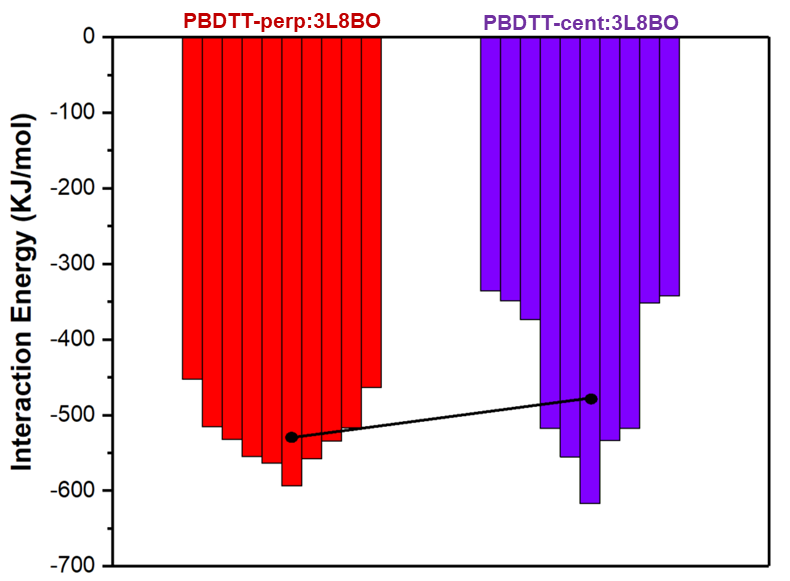


**Fig. S49** The interaction energy of ten conformations sets and average interaction energy by MD simulations for PBDTT-perp:L8BO and PBDTT-cent:L8BO with D:A=1:3 and polymer repeat unit n=3.

**19. Molecular structure**

**Fig. S50** Molecular structure of L8BO, Y6, eC9, PVDF-TrFE and PAEN.

**20. Optimization of Device Performance treated with PVDF-TrFE and PAEN**

**Table S22** Optimization of PVDF-TrFE solutions for PBDTT-perp/L8BO LBL conventional solar cells.*a*

| Solutions | *V*OC  [V] | *J*SC  [mA/cm2] | FF  [%] | PCE  [%] |
| --- | --- | --- | --- | --- |
| w/o | 0.907 | 26.78 | 79.22 | 19.25(19.03)*b* |
| CF | 0.905 | 26.42 | 77.62 | 18.56(17.89) |
| THF | 0.910 | 25.91 | 79.24 | 18.68(18.27) |
| NMP | 0.917 | 26.64 | 80.45 | 19.65(19.38) |

*a* Concentration and spin-coating condition: 5.4 mg/mL in CB for PBDTT-perp and 6mg/mL TCB, 3000 rpm for 30 s. PVDF-TrFE solutions were prepared at 0.7 mg/mL at 3000 rpm for 40 s. 8.6 mg/mL in CF for L8-BO and 3mg/mL TCB, 2500 rpm for 30 s. 90 oC for 5 min in L8BO layer annealing process.

*b*Data in parentheses are average for 10 cells.

**Table S23** Optimization of PVDF-TrFE layer for PBDTT-perp/L8BO LBL conventional solar cells.*a*

| Concentration  [mg/mL] | *V*OC  [V] | *J*SC  [mA/cm2] | FF  [%] | PCE  [%] |
| --- | --- | --- | --- | --- |
| 0.3 | 0.914 | 26.44 | 80.27 | 19.39(18.96)*b* |
| 0.7 | 0.917 | 26.64 | 80.45 | 19.65(19.38) |
| 1 | 0.921 | 25.57 | 79.08 | 18.62 (18.01) |
| 1.5 | 0.922 | 23.61 | 73.82 | 16.07 (14.93) |

*a* Concentration and spin-coating condition: 5.4 mg/mL in CB for PBDTT-perp and 6mg/mL TCB, 3000 rpm for 30 s. PVDF-TrFE solutions were prepared in NMP at 3000 rpm for 40 s. 8.6 mg/mL in CF for L8-BO and 3mg/mL TCB, 2500 rpm for 30 s. 90 oC for 5 min in L8BO layer annealing process.

*b*Data in parentheses are average for 10 cells.

**Table S24** Optimization of PAEN content and position for PBDTT-perp/L8BO LBL conventional solar cells.*a*

| Content | *V*OC  [V] | *J*SC  [mA/cm2] | FF  [%] | PCE  [%] |
| --- | --- | --- | --- | --- |
| PBDTT-perp: PAEN=1:0.01 | 0.920 | 26.92 | 79.76 | 19.39(18.96)*b* |
| PBDTT-perp: PAEN=1:0.02 | 0.922 | 27.20 | 80.21 | 20.13 (19.94) |
| PBDTT-perp: PAEN=1:0.05 | 0.921 | 26.27 | 78.83 | 18.62 (18.01) |
| PVDF-TrFE: PAEN=1:0.5 | 0.917 | 24.81 | 76.57 | 17.42 (17.07) |
| PVDF-TrFE: PAEN=1:1 | 0.915 | 23.26 | 71.16 | 15.14 (14.53) |
| PVDF-TrFE: PAEN=1:2 | 0.920 | 24.07 | 70.49 | 15.61 (15.19) |
| L8BO: PAEN=1:0.01 | 0.908 | 25.35 | 69.72 | 16.05 (15.68) |
| L8BO: PAEN=1:0.02 | 0.911 | 25.41 | 73.58 | 17.03(16.77) |
| L8BO: PAEN=1:0.05 | 0.913 | 24.28 | 70.44 | 15.61 (15.34) |

*a* Concentration and spin-coating condition: 5.4 mg/mL in CB for PBDTT-perp and 6mg/mL TCB, 3000 rpm for 30 s. PVDF-TrFE solutions were prepared at 0.7 mg/mL in NMP at 3000 rpm for 40 s. 8.6 mg/mL in CF for L8-BO and 3mg/mL TCB, 2500 rpm for 30 s. 90 oC for 5 min in L8BO layer annealing process.

*b*Data in parentheses are average for 10 cells.

**21. EQE curves of PBDTT-L8BO device treated with PVDF&PAEN**

**
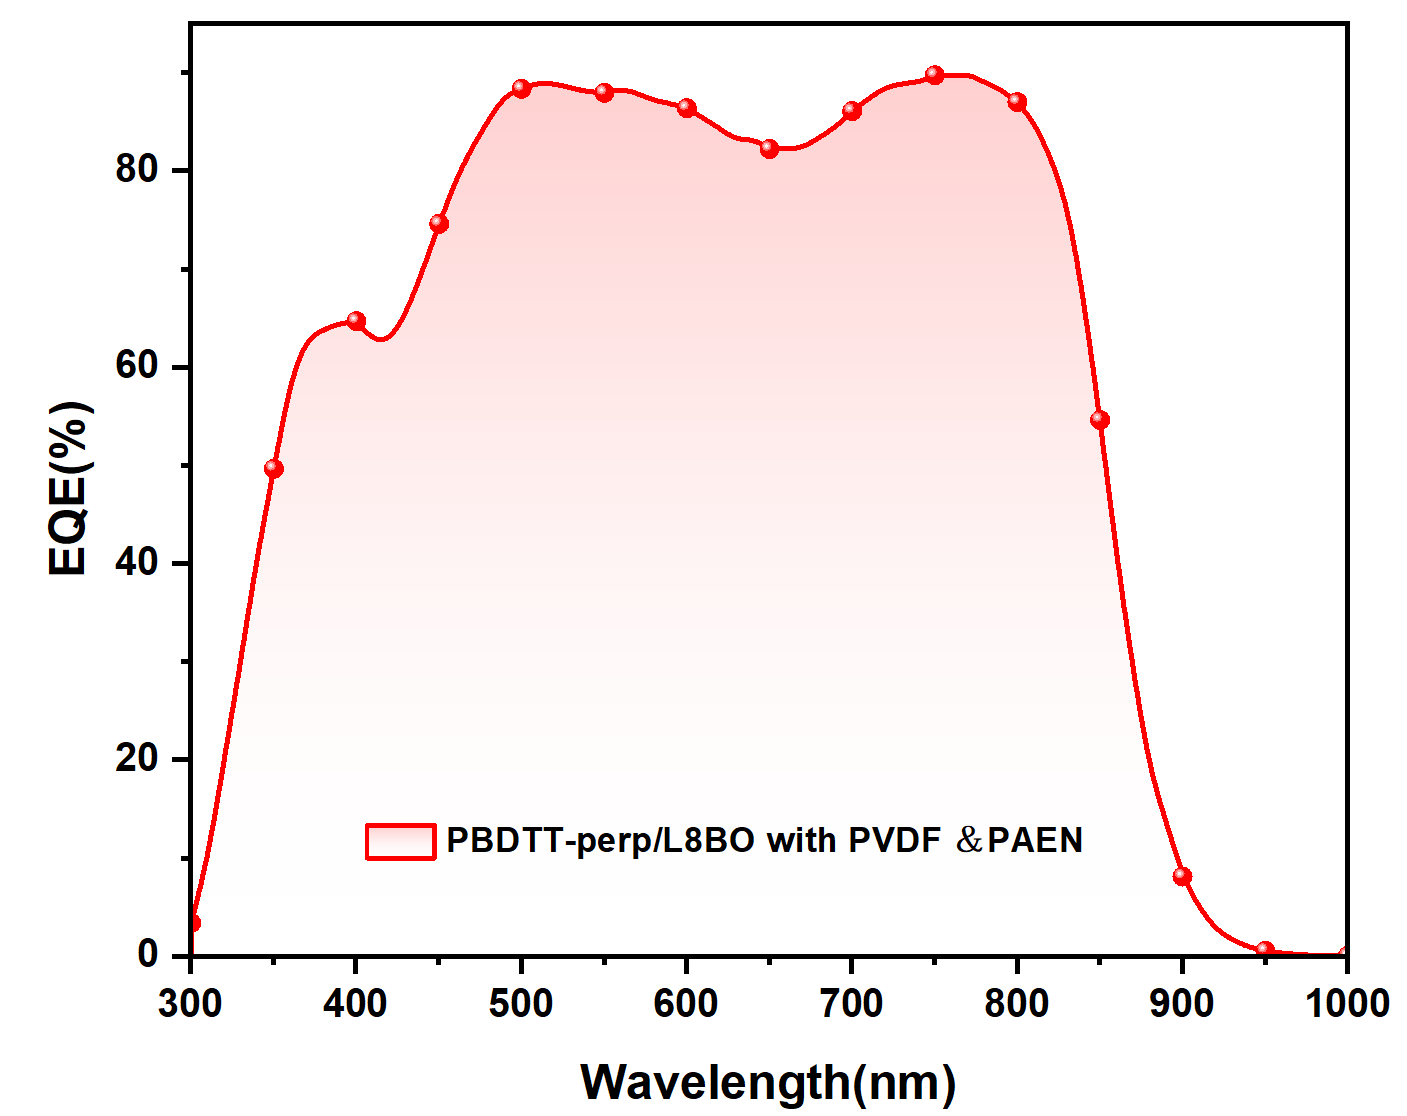
**

**Fig. S51** EQE curves of PBDTT-L8BO device treated with PVDF&PAEN

**22. The certification report**


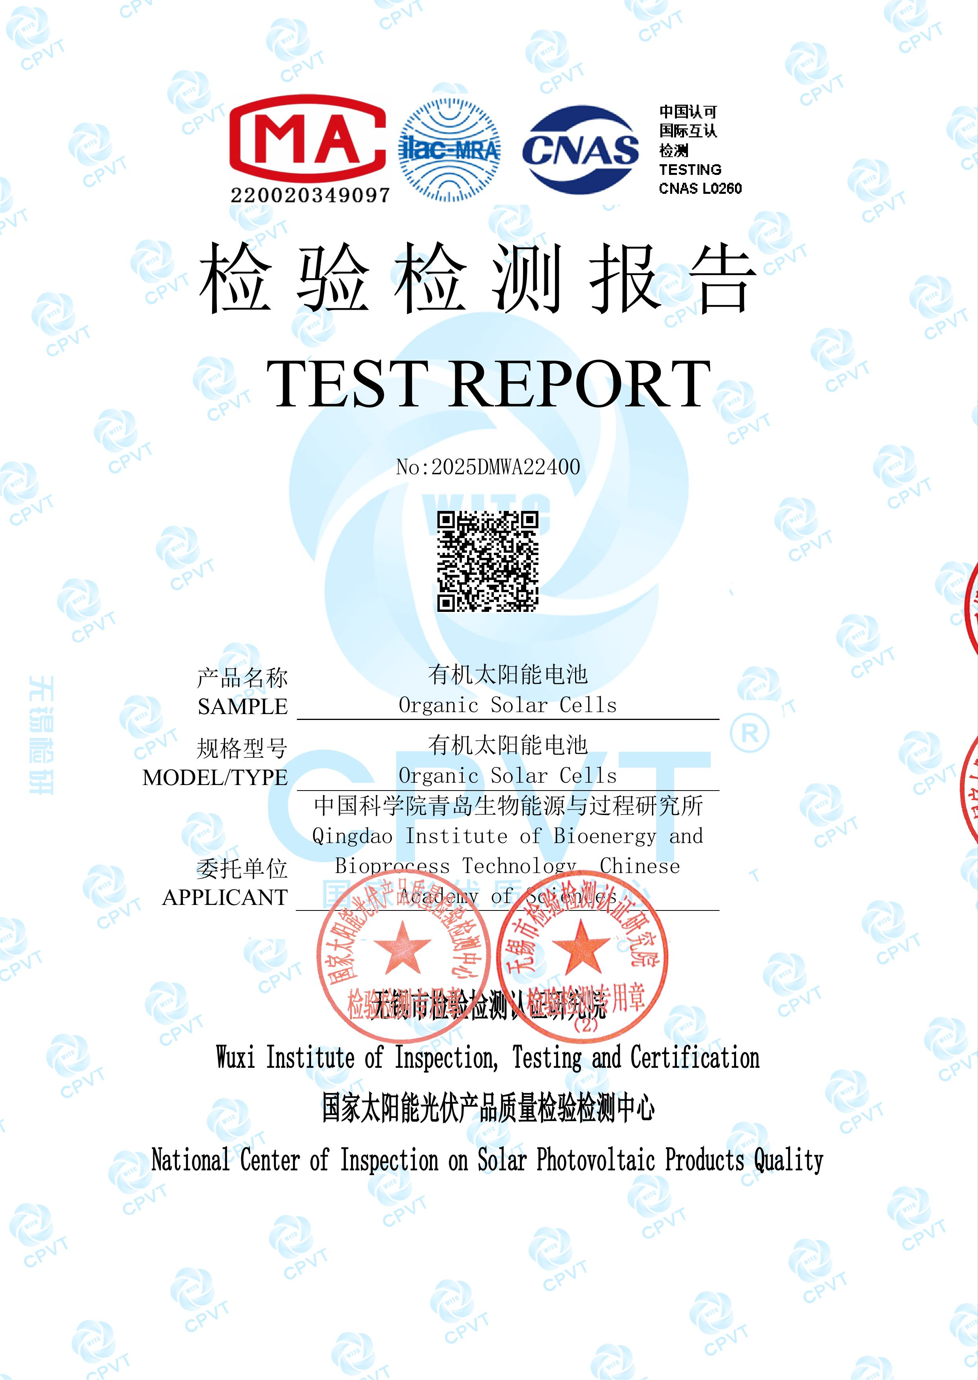

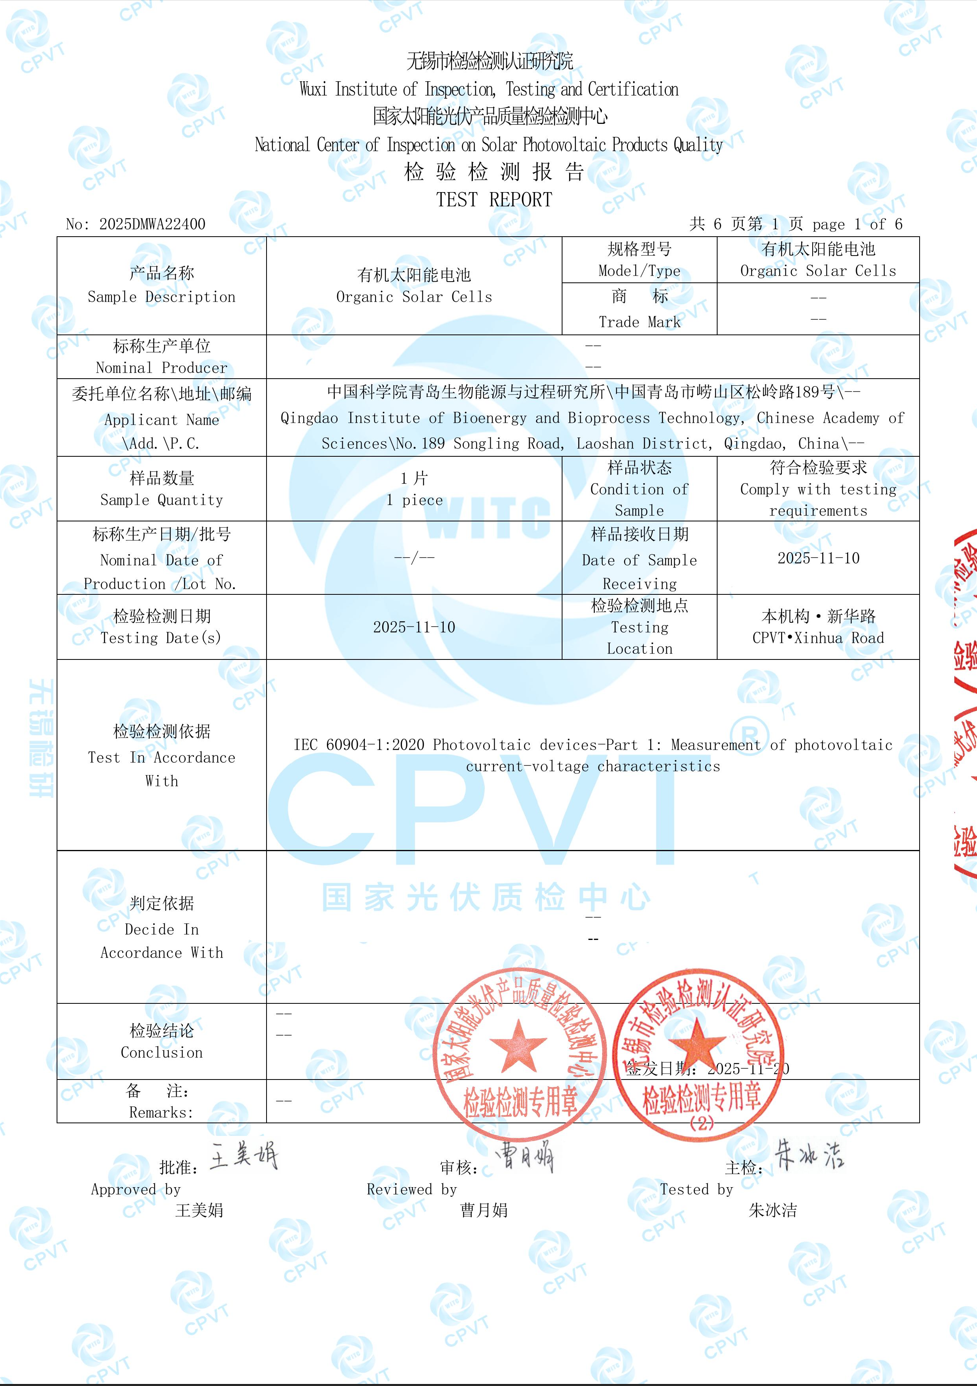

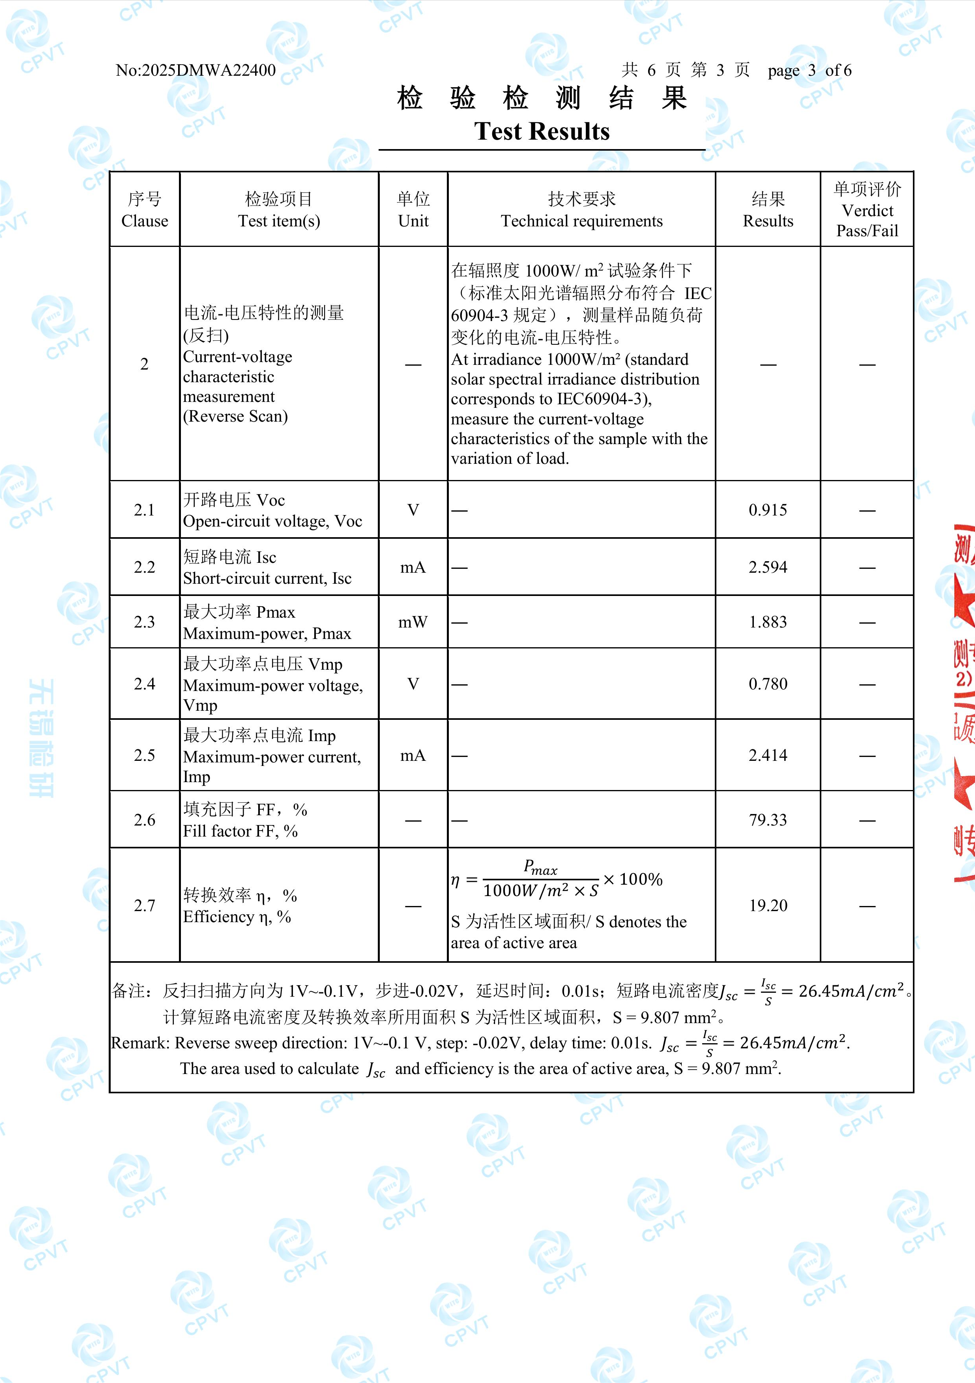

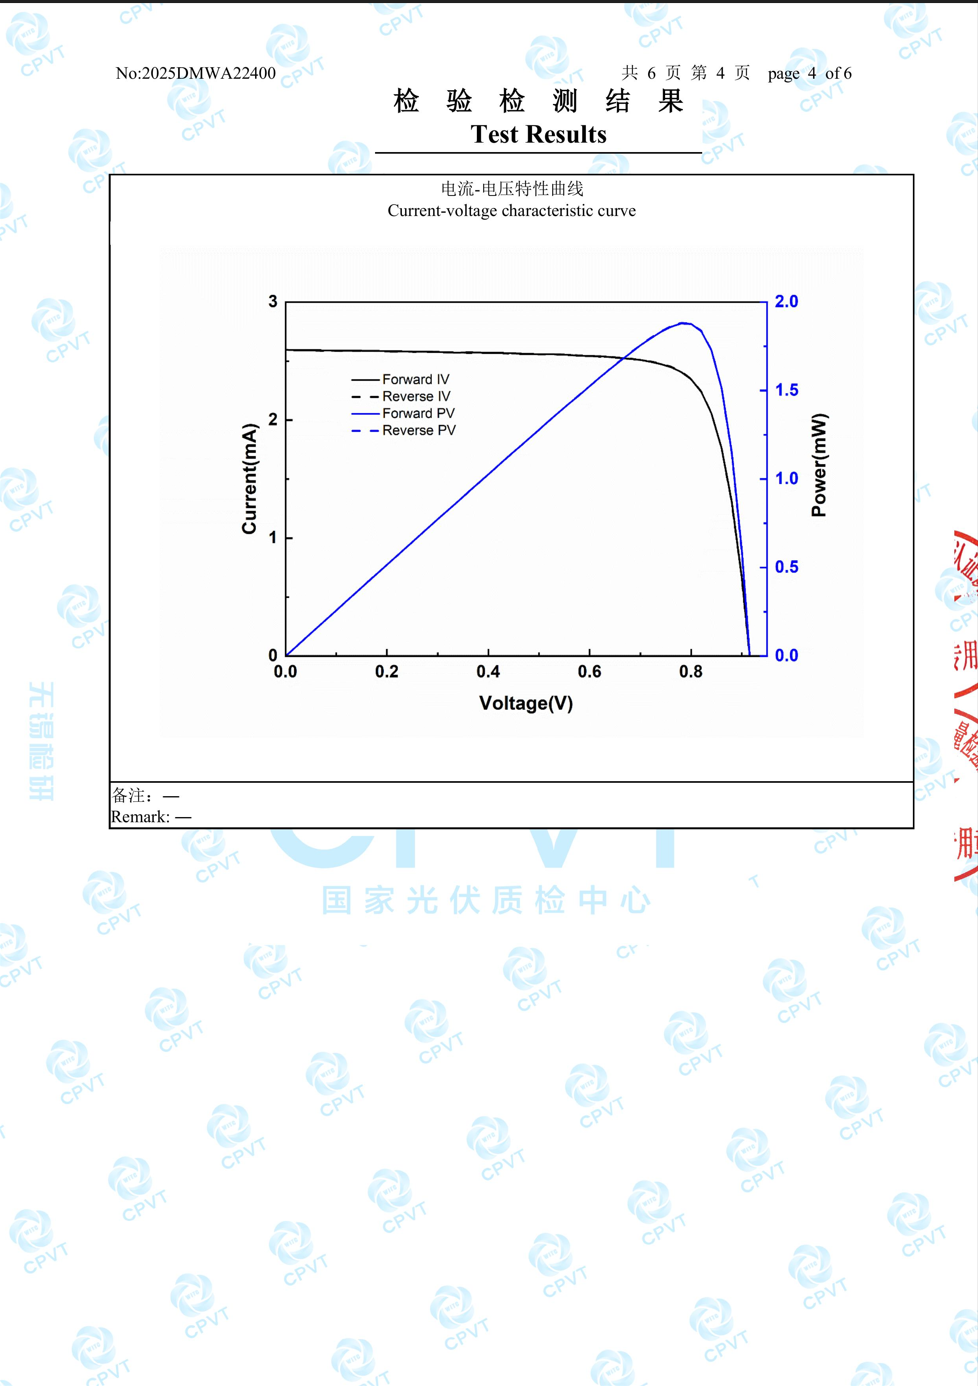


**Fig. S52** The certification report from CPVT, China, as for PBDTT-perp/L8BO device.

**23. Energy loss analysis**

The energy loss (Eloss) was analyzed according to the established energy-loss decomposition framework. The total Eloss, calculated as Eloss = Eg − q*VOC* (where Eg is the photovoltaic bandgap obtained from the intersection of absorption and photoluminescence spectra), consists of three components: radiative recombination loss above the bandgap (ΔE1), which calculated by Equation (S1), radiative recombination loss below the bandgap (ΔE2), and non-radiative recombination loss (ΔE3). In organic semiconductors, ΔE3 is typically dominant and closely associated with static energetic disorder arising from the microscopic inhomogeneity of donor and acceptor materials. The non-radiative loss ΔE3 was calculated by deriving form the Equation (S2).

≈……Equation (S1)

……Equation (S2)

**
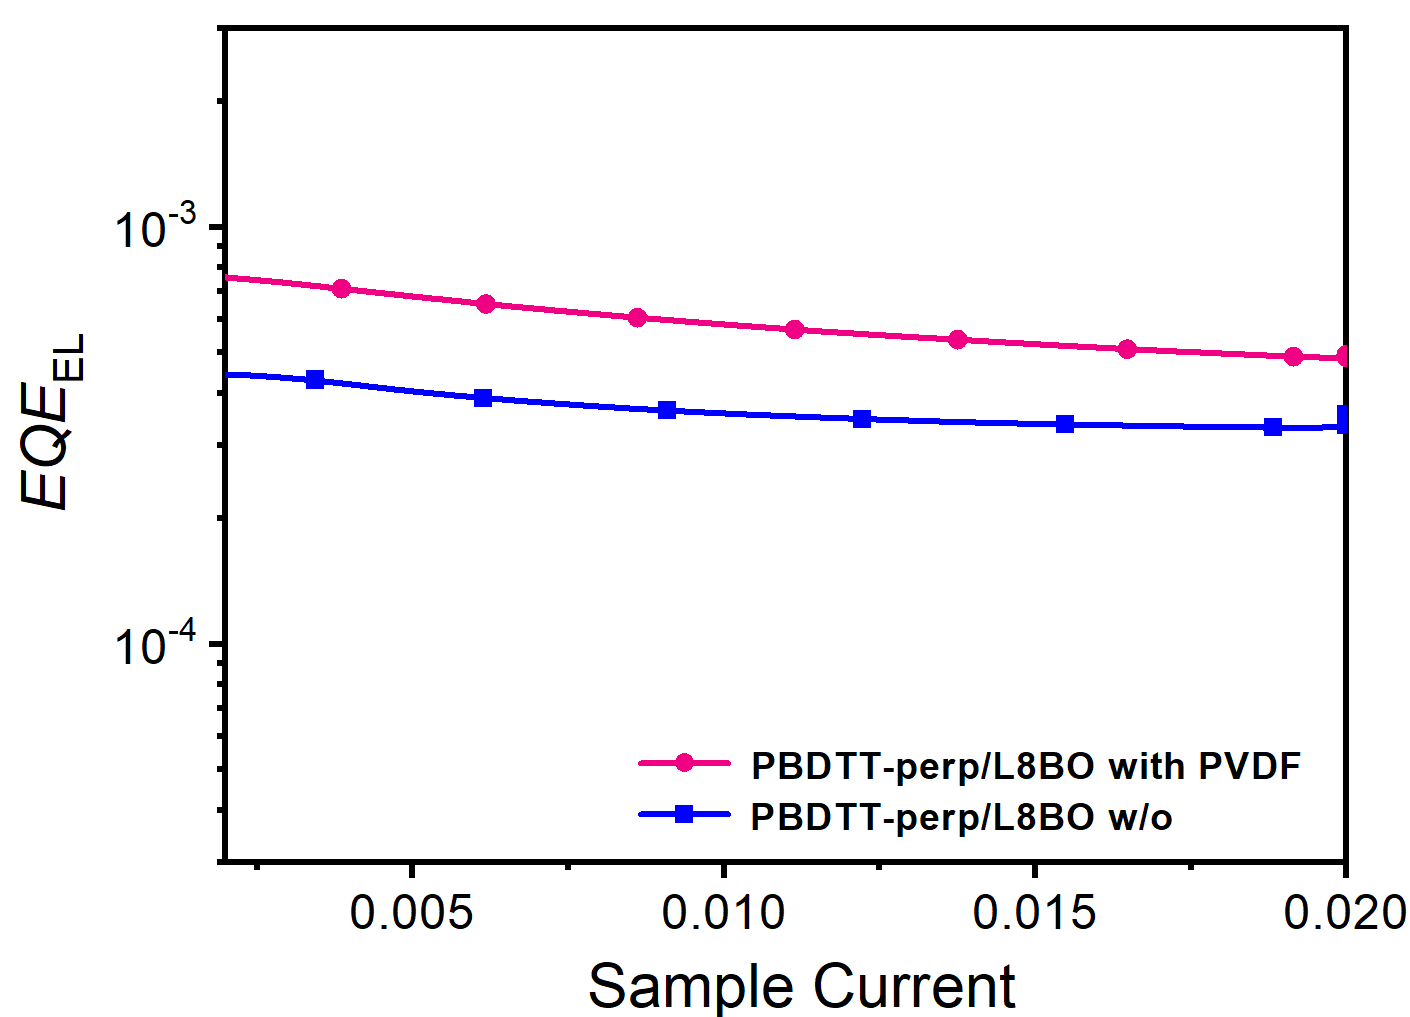
**

**Fig. S53** EQEEL spectra for PBDTT-perp/L8BO based devices treated with or without PVDF&PAEN.

**Table S25.** Energy loss data for PBDTT-perp/L8BO based devices.

| **Devices** | **Eg**  **[eV]** | ***VOC***  **[V]** | **Eloss**  **[eV]** | ***VOCSQ***  **(V)** | **ΔE1**  **[eV]** | **ΔE2**  **[eV]** | **ΔE3**  **[eV]** | **EQEEL**  **[×10-4]** |
| --- | --- | --- | --- | --- | --- | --- | --- | --- |
| **w/o** | 1.440 | 0.907 | 0.533 | 1.173 | 0.267 | 0.061 | 0.205 | 3.574 |
| **PVDF**&**PAEN** | 1.440 | 0.922 | 0.518 | 1.173 | 0.267 | 0.059 | 0.192 | 5.866 |

**24. Comparative evaluation of SEP principle in LBL and BHJ architecture**

**
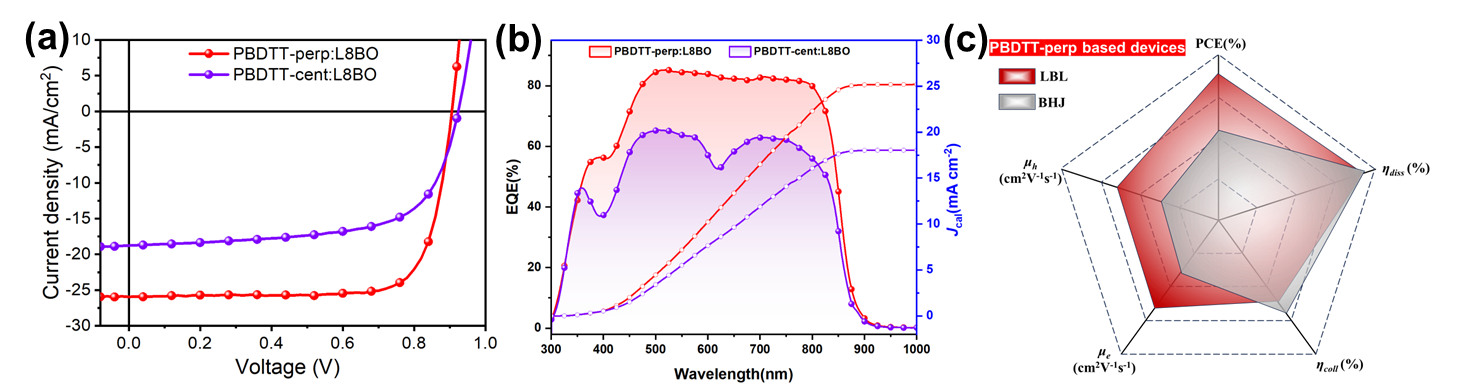
**

**Fig. S54** *J-V* plots (a) and EQE plots (b) of PBDTT-perp:L8BO and PBDTT-cent:L8BO BHJ devices. (c) Photovoltaic parameters of PBDTT-perp-based devices, PCEs, exciton dissociation/ collection efficiency, and charge carrier mobilities.

.
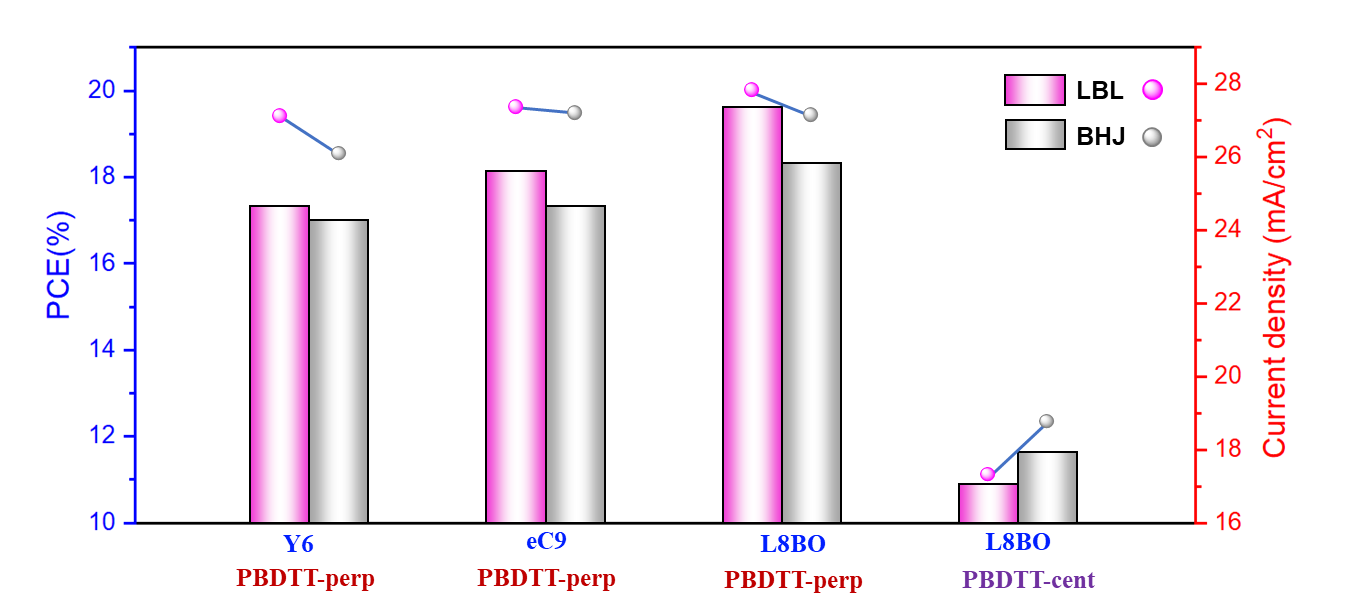


**Fig. S55** Comparison of PCEs and *J*SC for LBL/BHJ devices incorporating different acceptor systems.

**Table S26.**Performance data for BHJ devices.

|  | *V*OC  [V] | *J*SC  [mA cm-2] | *J*cal(a)  [mA cm-1] | FF  [%] | PCE(b)  [%] |
| --- | --- | --- | --- | --- | --- |
| PBDTT-perp:L8BO | 0.906 | 25.89 | 25.19 | 77.63 | 18.21 |
| PBDTT-cent:L8BO | 0.924 | 18.76 | 18.04 | 65.05 | 11.27 |

(a)The values were determined by integration of the EQE curves.

(b)The average values were calculated based on 20 individual devices.

**Table S27.**Performance data for Y6 and eC9 based devices.

|  | *V*OC  [V] | *J*SC  [mA cm-2] | FF  [%] | PCE(a)  [%] |
| --- | --- | --- | --- | --- |
| PBDTT-perp/Y6(b) | 0.854 | 27.16 | 74.46 | 17.27 |
| PBDTT-perp:Y6(c) | 0.855 | 27.12 | 73.26 | 16.99 |
| PBDTT-perp/eC9(b) | 0.846 | 27.74 | 77.27 | 18.13 |
| PBDTT-perp:eC9(c) | 0.846 | 26.89 | 75.89 | 17.27 |

(a)The average values were calculated based on 10 individual devices.

(b)The devices were based on LBL manufacturing method.

(c)The devices were based on BHJ manufacturing method.

**25. Summary of device performance.**

**Table S28.**Summary of binary device data for high-performance PDs designed with the SEP principle (except for D18 and PM6).

| Active layer(a) | *V*OC  [V] | *J*SC  [mA cm-2] | FF  [%] | PCE  [%] | Refs |
| --- | --- | --- | --- | --- | --- |
| PB2:BTP-Bme | 0.927 | 25.1 | 79.9 | 18.5 | *Angew. Chem. Int. Ed.* 2024, e202406153 |
| PTQ10:T2EH | 0.872 | 26.57 | 80.05 | 18.55 | *CCS Chem.* 2023, 841 |
| PBTz-F:L8BO | 0.896 | 26.71 | 77.59 | 18.57 | *Adv. Mater.* 2023, 2300631 |
| PTQ12-5:K2 | 0.873 | 27.91 | 77.02 | 18.77 | *Adv. Funct. Mater.* 2024, 2405168 |
| QQ1:PYIT | 0.904 | 26.49 | 78.57 | 18.81 | *Angew. Chem. Int. Ed.* 2024, e202319755 |
| PiBT:Y6 | 0.87 | 28.2 | 77.3 | 19.0 | *Adv. Mater.* 2024, 2312311 |
| P[4,8]BBO:  eC9-2Cl | 0.87 | 28.1 | 77.5 | 19.0 | *Adv. Mater.* 2025, 2503702 |
| PNB-3:L8BO | 0.907 | 26.59 | 78.86 | 19.02 | *Adv. Mater.* 2023, 2211871 |
| PM6-ClTz20:  BTP-eC9 | 0.846 | 27.96 | 80.50 | 19.04 | *Angew. Chem. Int. Ed.* 2025, e202515280 |
| PBZ-10:PY-IT | 0.962 | 25.93 | 76.43 | 19.06 | *Adv. Funct. Mater.* 2024, 2503009 |
| PF7:L8BO | 0.906 | 26.35 | 79.96 | 19.09 | *Adv. Mater.* 2024, 2404824 |
| PiNT:  BTP-eC9 | 0.88 | 27.8 | 77.6 | 19.1 | *Energy Environ. Sci.* 2024, 8593 |
| DL1:Y6 | 0.869 | 27.82 | 78.94 | 19.10 | *Adv. Mater.* 2024, 2308909 |
| DP3:L8BO | 0.891 | 26.94 | 79.66 | 19.12 | *Adv. Mater.* 2024, 2406329 |
| PBQx-TF:  eC9-2Cl | 0.879 | 27.2 | 80.4 | 19.2 | *Adv. Mater.* 2023, 2301583 |
| PBCE-2:  L8-BO | 0.91 | 26.49 | 79.70 | 19.2 | *Adv. Mater.* 2025, e16146 |
| PTQ10:DYBT | 0.882 | 27.22 | 81.34 | 19.53 | *Adv. Mater.* 2025, 2505735 |
| PTQ10:  m-BTP-PhC6 | 0.884 | 27.20 | 81.8 | 19.67 | *Energy Environ. Sci.* 2024, 3365 |
| PTQ18:K2 | 0.873 | 28.38 | 79.57 | 19.68 | *Adv. Mater.* 2025, 2503325 |
| PTQ11:TEH-F | 0.936 | 26.53 | 79.45 | 19.73 | *Energy Environ. Sci.* 2025, 386 |
| PBDCT:eC9 | 0.908 | 28.27 | 77.3 | 19.84 | *Angew. Chem.* 2025, e202416883 |
| PBDTT-perp:  L8BO | 0.922 | 27.20 | 80.21 | **20.13** | **This work** |

(a) Non-bold: terpolymers; **Bold: binary copolymers**.

**26. References**

[1] F. Bao, Y. Song, Q. Liu, C. Song, C. Liu, J. Wang, X. Jian, J. Xiao, Partial Bio-Based Poly(aryl ether ketone) Derived from 2,5-Furandicarboxylic Acid with Enhanced Processability. *Polym. Degrad. Stab.,* 2019, 161, 309-318.

[2] T. Lu, F. Chen, Multiwfn: A Multifunctional Wavefunction Analyzer, *J. Comput. Chem.*, 2012, 33, 580-592.

[3] T. Lu, Q. Chen, Independent gradient model based on Hirshfeld partition: A new method for visual study of interactions in chemical systems, *J. Comput. Chem.*, 2022, 43, 539 555.

[4] W. Humphrey, A. Dalke, K. Schulten. *J. Mol. Graphics*, 1996, 14, 33-38.

[5] T. Wang, J. Qin, Z. Xiao, X. Meng, C. Zuo, B. Yang, H. Tan, J. Yang, S. Yang, K. Sun, S. Xie, L. Ding, A 2.16 eV bandgap polymer donor gives 16% power conversion efficiency, *Sci. Bull.*, 2020, 65, 179-181.

[6] J. Wang, Y. Li, F. Bi, C. Yang, M. Vasilopoulou, J. Chu, X. Bao, Revealing Intrinsic Free Charge Generation: Promoting the Construction of Over 19% Efficient Planar p-n Heterojunction Organic Solar Cells. *Angew. Chem. Int. Ed.* 2025, 64, e202417143.
